# Supplementary material for: Loss of heterozygosity results in rapid but variable genome homogenization across yeast genetic backgrounds
Source: eLife. 2021 Jun 23;10:e70339. doi: 10.7554/eLife.70339 (PMC8245132; doi:10.7554/eLife.70339)
Supplement: Supplementary file 1. [file elife-70339-supp1.xlsx]

## Sheet: Sheet1
Supplementary file 1 - Haploid strains used to generate the nine hybrid diploids, standardized names as per Peter et al. 2018
Standardized name	Ploidy	Ecological origin	Geographical origin	Clade
ABS	n	Nature	NA	1. Wine/European
ABP	n	Fruit	Spain	1. Wine/European
BKL	n	Wine	Italy	1. Wine/European
BFQ	n	Cider	France	1. Wine/European
BAP	n	Soil	China	14. CHN III
BAN	n	Nature	China	20. CHN V
BTI	n	Tree	Canada	M3. Mosaic region 3
ABA	n	Human/Clinical	USA	M3. Mosaic region 3
ACD	n	Tree	USA	23.North american oak
AKQ	n	Insect	Ecuador	M3. Mosaic region 3
ACK	n	Palm wine	Ivory Coast	26. Asian fermentation
CMQ	n	Tree	USA	21. Ecuadorian
ACG	n	Fermentation	China	M1. Mosaic region 1
BAK	n	Tree	China	18. Far east asia
CGD	n	Fruit	USA	2. Alpechin
AKE	n	Palm wine	Nigeria	13. African palm wine
BAM	n	Nature	China	14. CHN III
CPG	n	Nature	Spain	2. Alpechin
