# Supplementary material for: Loss of heterozygosity results in rapid but variable genome homogenization across yeast genetic backgrounds
Source: eLife. 2021 Jun 23;10:e70339. doi: 10.7554/eLife.70339 (PMC8245132; doi:10.7554/eLife.70339)
Supplement: Supplementary file 2. — These estimates were used to determine the number of divisions at every bottleneck (see Materials and methods). [file elife-70339-supp2.xlsx]

## Sheet: Sheet1
Supplementary file 2 - Mean growth rate estimates at bottleneck 0 and at the end of the experiment for the nine genetic backgrounds. These estimates were used to determine the number of divisions at every bottleneck (See Methods, source data 4)
Hybrid	Mean initial growth rate (hr-1)	Mean end growth rate (hr-1)	Mean number of divisions/ bottlenecks
H1	0.5134	0.5057	24.5
H2	0.5147	0.5084	24.6
H3	0.5149	0.5162	24.7
H4	0.502	0.4827	23.6
H5	0.504	0.4821	23.7
H6	0.502	0.4933	23.9
H7	0.514	0.5087	24.5
H8	0.501	0.4815	23.6
H9	0.512	0.5032	24.4
