# Supplementary material for: Loss of heterozygosity results in rapid but variable genome homogenization across yeast genetic backgrounds
Source: eLife. 2021 Jun 23;10:e70339. doi: 10.7554/eLife.70339 (PMC8245132; doi:10.7554/eLife.70339)
Supplement: Supplementary file 3. — Tracts were merged if consecutive tracts were disrupted by less than two SNPs. LOH tracts in nearly homozygous lines highlighted in yellow. [file elife-70339-supp3.xlsx]

## Sheet: Sheet1
Supplementary file 3- LOH tracts across the 169 MA lines. Nearly homozygous lines in each of the backgrounds have been highlighted.
Chr	Start	Stop	Size	SNPs	Type	Line ID	Background	Fertility
1	139704	141212	1508	3	Interstitial	H1-02	H1	High
1	187323	187589	266	3	Interstitial	H1-02	H1	High
8	526829	527727	898	9	Interstitial	H1-02	H1	High
10	701964	703042	1078	2	Interstitial	H1-02	H1	High
16	837331	840363	3032	2	Interstitial	H1-02	H1	High
1	187323	187582	259	2	Interstitial	H1-03	H1	High
2	605521	609433	3912	2	Interstitial	H1-03	H1	High
4	981068	981081	13	3	Interstitial	H1-03	H1	High
13	873179	874282	1103	5	Interstitial	H1-03	H1	High
14	195245	202490	7245	6	Interstitial	H1-03	H1	High
1	187323	187508	185	2	Interstitial	H1-04	H1	High
6	30370	136124	105754	99	Interstitial	H1-04	H1	High
14	48826	52090	3264	2	Interstitial	H1-04	H1	High
15	29336	32374	3038	2	Interstitial	H1-04	H1	High
15	172968	179659	6691	11	Interstitial	H1-04	H1	High
16	161475	168659	7184	3	Interstitial	H1-04	H1	High
6	30370	136124	105754	99	Interstitial	H1-05	H1	High
7	891911	897457	5546	15	Interstitial	H1-05	H1	High
8	527367	527444	77	4	Interstitial	H1-05	H1	High
10	701964	703042	1078	2	Interstitial	H1-05	H1	High
13	486333	555686	69353	67	Interstitial	H1-05	H1	High
14	48826	52090	3264	2	Interstitial	H1-05	H1	High
15	219097	228991	9894	9	Interstitial	H1-05	H1	High
15	172968	179659	6691	11	Interstitial	H1-05	H1	High
1	139711	141212	1501	2	Interstitial	H1-06	H1	High
1	183580	183599	19	2	Interstitial	H1-06	H1	High
7	852268	859040	6772	10	Interstitial	H1-06	H1	High
13	873182	874282	1100	3	Interstitial	H1-06	H1	High
16	837331	840363	3032	2	Interstitial	H1-06	H1	High
1	183580	183599	19	2	Interstitial	H1-07	H1	High
4	373146	375887	2741	2	Interstitial	H1-07	H1	High
7	852268	859040	6772	10	Interstitial	H1-07	H1	High
10	139423	145161	5738	2	Interstitial	H1-07	H1	High
7	633155	638933	5778	2	Interstitial	H1-08	H1	High
10	132118	135086	2968	2	Interstitial	H1-08	H1	High
12	31364	42311	10947	6	Interstitial	H1-08	H1	High
16	96058	111976	15918	2	Interstitial	H1-08	H1	High
2	298803	301207	2404	2	Interstitial	H1-09	H1	High
7	852268	859040	6772	10	Interstitial	H1-09	H1	High
1	187323	187508	185	2	Interstitial	H1-1	H1	High
1	106646	109655	3009	3	Interstitial	H1-1	H1	High
5	105291	109296	4005	3	Interstitial	H1-1	H1	High
8	526829	527597	768	8	Interstitial	H1-1	H1	High
13	286747	288897	2150	3	Interstitial	H1-1	H1	High
1	187323	187508	185	2	Interstitial	H1-10	H1	High
7	852268	859040	6772	10	Interstitial	H1-10	H1	High
10	139423	145161	5738	2	Interstitial	H1-10	H1	High
10	263750	271759	8009	4	Interstitial	H1-10	H1	High
10	156511	260423	103912	60	Interstitial	H1-10	H1	High
16	380396	381750	1354	3	Interstitial	H1-10	H1	High
1	139711	141212	1501	2	Interstitial	H1-11	H1	High
1	187323	187589	266	3	Interstitial	H1-11	H1	High
7	65966	76336	10370	6	Interstitial	H1-11	H1	High
9	404346	408430	4084	2	Interstitial	H1-11	H1	High
10	540519	543166	2647	4	Interstitial	H1-11	H1	High
11	174989	183197	8208	29	Interstitial	H1-11	H1	High
12	621042	942689	321647	274	Interstitial	H1-11	H1	High
15	541019	543706	2687	2	Interstitial	H1-11	H1	High
16	837331	840363	3032	2	Interstitial	H1-11	H1	High
16	25321	548439	523118	372	Interstitial	H1-11	H1	High
1	139704	141212	1508	3	Interstitial	H1-12	H1	High
1	187323	187589	266	3	Interstitial	H1-12	H1	High
1	188307	188407	100	3	Interstitial	H1-12	H1	High
3	73831	76928	3097	3	Interstitial	H1-12	H1	High
6	89849	100079	10230	9	Interstitial	H1-12	H1	High
7	369294	372105	2811	3	Interstitial	H1-12	H1	High
8	117667	124201	6534	4	Interstitial	H1-12	H1	High
10	397093	401700	4607	8	Interstitial	H1-12	H1	High
14	752339	752621	282	2	Interstitial	H1-12	H1	High
14	489779	497391	7612	6	Interstitial	H1-12	H1	High
16	461780	465611	3831	4	Interstitial	H1-12	H1	High
1	139704	141212	1508	3	Interstitial	H1-13	H1	High
1	187323	187589	266	3	Interstitial	H1-13	H1	High
4	1382073	1383566	1493	2	Interstitial	H1-13	H1	High
6	30370	35394	5024	3	Interstitial	H1-13	H1	High
7	403998	404774	776	2	Interstitial	H1-13	H1	High
9	26073	222207	196134	161	Interstitial	H1-13	H1	High
12	127350	131926	4576	2	Interstitial	H1-13	H1	High
13	873179	874282	1103	5	Interstitial	H1-13	H1	High
15	190997	199405	8408	3	Interstitial	H1-13	H1	High
15	456867	462600	5733	30	Interstitial	H1-13	H1	High
1	139704	141212	1508	3	Interstitial	H1-14	H1	High
1	187323	187589	266	3	Interstitial	H1-14	H1	High
4	743067	758382	15315	5	Interstitial	H1-14	H1	High
10	25990	416267	390277	220	Interstitial	H1-14	H1	High
15	290654	299054	8400	4	Interstitial	H1-14	H1	High
1	139704	141212	1508	3	Interstitial	H1-15	H1	High
1	187323	187589	266	3	Interstitial	H1-15	H1	High
5	21808	22885	1077	2	Interstitial	H1-15	H1	High
11	26862	33373	6511	5	Interstitial	H1-15	H1	High
12	31364	35452	4088	2	Interstitial	H1-15	H1	High
12	192660	195279	2619	2	Interstitial	H1-15	H1	High
1	139704	141212	1508	3	Interstitial	H1-16	H1	High
1	187323	187589	266	3	Interstitial	H1-16	H1	High
2	564763	570997	6234	5	Interstitial	H1-16	H1	High
2	553288	562048	8760	9	Interstitial	H1-16	H1	High
7	1060217	1064214	3997	3	Interstitial	H1-16	H1	High
9	26073	43298	17225	12	Interstitial	H1-16	H1	High
15	703630	707115	3485	6	Interstitial	H1-16	H1	High
16	837331	840363	3032	2	Interstitial	H1-16	H1	High
1	139711	141212	1501	2	Interstitial	H1-17	H1	High
1	187323	187589	266	3	Interstitial	H1-17	H1	High
4	700452	704074	3622	2	Interstitial	H1-17	H1	High
5	23070	28943	5873	17	Interstitial	H1-17	H1	High
6	77841	93838	15997	11	Interstitial	H1-17	H1	High
8	526829	527483	654	7	Interstitial	H1-17	H1	High
16	557459	559577	2118	2	Interstitial	H1-17	H1	High
1	140104	141212	1108	2	Interstitial	H1-18	H1	High
1	187323	187589	266	3	Interstitial	H1-18	H1	High
4	657310	663411	6101	5	Interstitial	H1-18	H1	High
6	77841	93838	15997	11	Interstitial	H1-18	H1	High
8	526829	527436	607	4	Interstitial	H1-18	H1	High
10	701964	703042	1078	2	Interstitial	H1-18	H1	High
16	557459	559577	2118	2	Interstitial	H1-18	H1	High
16	25321	173714	148393	75	Interstitial	H1-18	H1	High
1	139711	141212	1501	2	Interstitial	H1-19	H1	High
1	183563	183725	162	2	Interstitial	H1-19	H1	High
1	187323	187508	185	2	Interstitial	H1-19	H1	High
2	427785	430279	2494	2	Interstitial	H1-19	H1	High
4	171436	173421	1985	5	Interstitial	H1-19	H1	High
4	1496753	1499747	2994	5	Interstitial	H1-19	H1	High
8	59384	62230	2846	2	Interstitial	H1-19	H1	High
8	202201	522176	319975	261	Interstitial	H1-19	H1	High
9	275424	281980	6556	8	Interstitial	H1-19	H1	High
10	701964	703042	1078	2	Interstitial	H1-19	H1	High
12	432801	436219	3418	2	Interstitial	H1-19	H1	High
12	550492	553046	2554	3	Interstitial	H1-19	H1	High
13	873179	874282	1103	5	Interstitial	H1-19	H1	High
16	25321	369994	344673	273	Interstitial	H1-19	H1	High
1	187323	187582	259	2	Interstitial	H1-20	H1	High
1	158737	169085	10348	4	Interstitial	H1-20	H1	High
2	427785	430279	2494	2	Interstitial	H1-20	H1	High
4	171436	173421	1985	5	Interstitial	H1-20	H1	High
4	1496753	1499747	2994	5	Interstitial	H1-20	H1	High
8	59384	62230	2846	2	Interstitial	H1-20	H1	High
8	526829	527445	616	6	Interstitial	H1-20	H1	High
8	202201	522176	319975	261	Interstitial	H1-20	H1	High
9	275424	281980	6556	8	Interstitial	H1-20	H1	High
9	391736	404346	12610	27	Interstitial	H1-20	H1	High
10	25990	46481	20491	11	Interstitial	H1-20	H1	High
12	338048	360069	22021	6	Interstitial	H1-20	H1	High
13	873179	874282	1103	5	Interstitial	H1-20	H1	High
15	703631	707114	3483	3	Interstitial	H1-20	H1	High
16	25321	369994	344673	273	Interstitial	H1-20	H1	High
14	7114	13353	6239	3	Terminal	H1-02	H1	High
15	1072334	1074866	2532	3	Terminal	H1-02	H1	High
2	801546	801636	90	3	Terminal	H1-03	H1	High
15	1072334	1074866	2532	3	Terminal	H1-03	H1	High
2	294500	801782	507282	418	Terminal	H1-04	H1	High
13	486333	915129	428796	378	Terminal	H1-04	H1	High
15	1072334	1074866	2532	3	Terminal	H1-04	H1	High
15	1072334	1074822	2488	2	Terminal	H1-05	H1	High
12	9813	22176	12363	17	Terminal	H1-06	H1	High
14	782200	783370	1170	2	Terminal	H1-06	H1	High
15	1072334	1074866	2532	3	Terminal	H1-06	H1	High
3	307434	310874	3440	2	Terminal	H1-07	H1	High
4	684384	1522862	838478	606	Terminal	H1-07	H1	High
11	3702	155211	151509	344	Terminal	H1-07	H1	High
15	1072334	1074822	2488	2	Terminal	H1-07	H1	High
2	473813	801782	327969	281	Terminal	H1-08	H1	High
3	307434	310874	3440	2	Terminal	H1-08	H1	High
4	570073	1522862	952789	705	Terminal	H1-08	H1	High
5	408995	565317	156322	94	Terminal	H1-08	H1	High
12	1030628	1058612	27984	14	Terminal	H1-08	H1	High
15	1072334	1074822	2488	2	Terminal	H1-08	H1	High
2	793237	797052	3815	5	Terminal	H1-09	H1	High
3	307434	310874	3440	2	Terminal	H1-09	H1	High
4	468533	1522862	1054329	757	Terminal	H1-09	H1	High
12	475611	1058612	583001	561	Terminal	H1-09	H1	High
6	172702	270091	97389	57	Terminal	H1-1	H1	High
10	448621	731001	282380	228	Terminal	H1-1	H1	High
11	530434	660824	130390	83	Terminal	H1-1	H1	High
3	307434	310874	3440	2	Terminal	H1-10	H1	High
11	3702	155211	151509	344	Terminal	H1-10	H1	High
15	1072334	1074822	2488	2	Terminal	H1-10	H1	High
2	801545	801627	82	2	Terminal	H1-11	H1	High
6	249773	270091	20318	18	Terminal	H1-11	H1	High
8	5446	11056	5610	2	Terminal	H1-11	H1	High
12	946204	1058612	112408	86	Terminal	H1-11	H1	High
15	1072334	1074896	2562	4	Terminal	H1-11	H1	High
13	8674	97444	88770	100	Terminal	H1-12	H1	High
14	7115	10224	3109	2	Terminal	H1-12	H1	High
14	778827	782200	3373	3	Terminal	H1-12	H1	High
15	1072334	1074846	2512	2	Terminal	H1-12	H1	High
2	644502	801782	157280	151	Terminal	H1-13	H1	High
3	10782	110079	99297	54	Terminal	H1-13	H1	High
12	562880	1058612	495732	408	Terminal	H1-13	H1	High
15	1072334	1074866	2532	3	Terminal	H1-13	H1	High
16	762759	942419	179660	219	Terminal	H1-13	H1	High
2	678139	801782	123643	136	Terminal	H1-14	H1	High
5	160922	565317	404395	286	Terminal	H1-14	H1	High
6	13586	30370	16784	14	Terminal	H1-14	H1	High
12	9813	16909	7096	12	Terminal	H1-14	H1	High
15	1072334	1074866	2532	3	Terminal	H1-14	H1	High
2	801441	801461	20	4	Terminal	H1-15	H1	High
15	1072334	1074822	2488	2	Terminal	H1-15	H1	High
4	898237	1522862	624625	458	Terminal	H1-16	H1	High
15	1072334	1074846	2512	2	Terminal	H1-16	H1	High
3	307434	310874	3440	2	Terminal	H1-17	H1	High
5	18200	20933	2733	2	Terminal	H1-17	H1	High
11	565583	660824	95241	70	Terminal	H1-17	H1	High
12	475611	1058612	583001	561	Terminal	H1-17	H1	High
15	341596	1074866	733270	608	Terminal	H1-17	H1	High
4	668078	1522862	854784	629	Terminal	H1-18	H1	High
5	18200	28943	10743	25	Terminal	H1-18	H1	High
5	249534	565317	315783	207	Terminal	H1-18	H1	High
11	565583	660824	95241	70	Terminal	H1-18	H1	High
15	341596	1074846	733250	607	Terminal	H1-18	H1	High
16	768298	942359	174061	213	Terminal	H1-18	H1	High
2	665886	801782	135896	138	Terminal	H1-19	H1	High
15	1072334	1074846	2512	2	Terminal	H1-19	H1	High
2	665886	801782	135896	138	Terminal	H1-20	H1	High
3	307434	310874	3440	2	Terminal	H1-20	H1	High
6	13586	30370	16784	14	Terminal	H1-20	H1	High
12	374108	1058612	684504	624	Terminal	H1-20	H1	High
15	1072334	1074822	2488	2	Terminal	H1-20	H1	High
1	186797	187499	702	2	Interstitial	H2-01	H2	High
1	184503	185634	1131	3	Interstitial	H2-01	H2	High
2	162262	167284	5022	2	Interstitial	H2-01	H2	High
2	284728	290028	5300	6	Interstitial	H2-01	H2	High
3	126467	126546	79	3	Interstitial	H2-01	H2	High
3	268554	280833	12279	4	Interstitial	H2-01	H2	High
4	86005	87556	1551	2	Interstitial	H2-01	H2	High
4	524452	526981	2529	2	Interstitial	H2-01	H2	High
4	637849	640983	3134	2	Interstitial	H2-01	H2	High
4	694353	694753	400	2	Interstitial	H2-01	H2	High
4	1280961	1289798	8837	2	Interstitial	H2-01	H2	High
4	1358362	1361250	2888	2	Interstitial	H2-01	H2	High
4	20398	21719	1321	3	Interstitial	H2-01	H2	High
4	114620	134783	20163	3	Interstitial	H2-01	H2	High
4	239920	242280	2360	4	Interstitial	H2-01	H2	High
5	24378	25697	1319	2	Interstitial	H2-01	H2	High
5	339205	341029	1824	2	Interstitial	H2-01	H2	High
5	222408	222580	172	3	Interstitial	H2-01	H2	High
5	287627	289794	2167	3	Interstitial	H2-01	H2	High
5	349767	363564	13797	4	Interstitial	H2-01	H2	High
6	94454	97598	3144	3	Interstitial	H2-01	H2	High
7	351151	371225	20074	4	Interstitial	H2-01	H2	High
7	238522	261616	23094	7	Interstitial	H2-01	H2	High
7	263135	285419	22284	8	Interstitial	H2-01	H2	High
7	430742	469959	39217	10	Interstitial	H2-01	H2	High
8	30245	33999	3754	2	Interstitial	H2-01	H2	High
8	58408	60027	1619	2	Interstitial	H2-01	H2	High
8	228393	233658	5265	2	Interstitial	H2-01	H2	High
8	330971	335746	4775	2	Interstitial	H2-01	H2	High
9	383468	384920	1452	2	Interstitial	H2-01	H2	High
9	399311	399578	267	6	Interstitial	H2-01	H2	High
10	323750	332795	9045	2	Interstitial	H2-01	H2	High
10	556117	564653	8536	2	Interstitial	H2-01	H2	High
10	649989	659463	9474	2	Interstitial	H2-01	H2	High
10	712357	717639	5282	2	Interstitial	H2-01	H2	High
11	134345	136605	2260	2	Interstitial	H2-01	H2	High
11	233168	233594	426	2	Interstitial	H2-01	H2	High
11	378144	378288	144	2	Interstitial	H2-01	H2	High
13	341361	344873	3512	2	Interstitial	H2-01	H2	High
13	573616	584688	11072	2	Interstitial	H2-01	H2	High
13	615439	618026	2587	2	Interstitial	H2-01	H2	High
14	203692	207522	3830	2	Interstitial	H2-01	H2	High
14	256138	256319	181	2	Interstitial	H2-01	H2	High
14	395060	399382	4322	2	Interstitial	H2-01	H2	High
14	411482	412326	844	2	Interstitial	H2-01	H2	High
14	419354	421191	1837	3	Interstitial	H2-01	H2	High
15	211828	218078	6250	2	Interstitial	H2-01	H2	High
15	272804	277085	4281	2	Interstitial	H2-01	H2	High
15	443842	447183	3341	2	Interstitial	H2-01	H2	High
15	580384	583089	2705	2	Interstitial	H2-01	H2	High
15	1020415	1027235	6820	2	Interstitial	H2-01	H2	High
15	1048842	1050116	1274	2	Interstitial	H2-01	H2	High
15	807305	811138	3833	3	Interstitial	H2-01	H2	High
15	60460	64392	3932	4	Interstitial	H2-01	H2	High
15	74680	80494	5814	14	Interstitial	H2-01	H2	High
15	586185	764636	178451	38	Interstitial	H2-01	H2	High
16	186567	191281	4714	2	Interstitial	H2-01	H2	High
16	300089	302654	2565	2	Interstitial	H2-01	H2	High
16	541133	547966	6833	2	Interstitial	H2-01	H2	High
16	82470	100739	18269	6	Interstitial	H2-01	H2	High
2	56970	65649	8679	2	Interstitial	H2-02	H2	High
2	79173	79922	749	2	Interstitial	H2-02	H2	High
2	80729	85790	5061	2	Interstitial	H2-02	H2	High
2	110582	112758	2176	2	Interstitial	H2-02	H2	High
2	283577	286992	3415	4	Interstitial	H2-02	H2	High
2	154970	167284	12314	5	Interstitial	H2-02	H2	High
2	650740	660442	9702	5	Interstitial	H2-02	H2	High
2	38759	45364	6605	8	Interstitial	H2-02	H2	High
2	708226	712818	4592	8	Interstitial	H2-02	H2	High
3	67192	73880	6688	3	Interstitial	H2-02	H2	High
3	205115	205867	752	4	Interstitial	H2-02	H2	High
4	176151	178045	1894	2	Interstitial	H2-02	H2	High
4	216370	219497	3127	2	Interstitial	H2-02	H2	High
4	671085	671668	583	2	Interstitial	H2-02	H2	High
4	1194324	1199649	5325	2	Interstitial	H2-02	H2	High
4	1480971	1484370	3399	2	Interstitial	H2-02	H2	High
4	477029	481490	4461	3	Interstitial	H2-02	H2	High
4	680149	684135	3986	3	Interstitial	H2-02	H2	High
4	350753	352391	1638	4	Interstitial	H2-02	H2	High
5	153014	156958	3944	2	Interstitial	H2-02	H2	High
5	339205	341029	1824	2	Interstitial	H2-02	H2	High
5	299220	312492	13272	7	Interstitial	H2-02	H2	High
5	402553	417834	15281	13	Interstitial	H2-02	H2	High
6	112001	115529	3528	5	Interstitial	H2-02	H2	High
7	296609	299078	2469	2	Interstitial	H2-02	H2	High
7	421005	422876	1871	3	Interstitial	H2-02	H2	High
7	668650	671707	3057	3	Interstitial	H2-02	H2	High
7	925522	928858	3336	3	Interstitial	H2-02	H2	High
7	263350	273449	10099	7	Interstitial	H2-02	H2	High
7	320539	334505	13966	42	Interstitial	H2-02	H2	High
8	297545	299307	1762	2	Interstitial	H2-02	H2	High
8	327687	333722	6035	2	Interstitial	H2-02	H2	High
8	121024	126061	5037	3	Interstitial	H2-02	H2	High
8	292040	296989	4949	4	Interstitial	H2-02	H2	High
8	30245	40336	10091	5	Interstitial	H2-02	H2	High
9	383468	384920	1452	2	Interstitial	H2-02	H2	High
9	398169	398843	674	6	Interstitial	H2-02	H2	High
10	251590	258112	6522	2	Interstitial	H2-02	H2	High
10	322100	323585	1485	2	Interstitial	H2-02	H2	High
10	346697	350378	3681	2	Interstitial	H2-02	H2	High
10	60790	72081	11291	7	Interstitial	H2-02	H2	High
11	161801	168223	6422	2	Interstitial	H2-02	H2	High
11	369331	369681	350	2	Interstitial	H2-02	H2	High
11	382169	385576	3407	2	Interstitial	H2-02	H2	High
11	387781	389831	2050	2	Interstitial	H2-02	H2	High
11	140940	141302	362	3	Interstitial	H2-02	H2	High
11	488771	491002	2231	3	Interstitial	H2-02	H2	High
11	185630	186729	1099	4	Interstitial	H2-02	H2	High
11	463646	471985	8339	6	Interstitial	H2-02	H2	High
12	808354	808538	184	2	Interstitial	H2-02	H2	High
12	582292	586485	4193	3	Interstitial	H2-02	H2	High
13	377872	387226	9354	2	Interstitial	H2-02	H2	High
13	306034	307507	1473	3	Interstitial	H2-02	H2	High
13	342525	357261	14736	5	Interstitial	H2-02	H2	High
14	256138	256319	181	2	Interstitial	H2-02	H2	High
14	268264	271676	3412	2	Interstitial	H2-02	H2	High
14	413108	416777	3669	2	Interstitial	H2-02	H2	High
14	444176	447074	2898	2	Interstitial	H2-02	H2	High
14	488327	494753	6426	2	Interstitial	H2-02	H2	High
14	376524	391169	14645	5	Interstitial	H2-02	H2	High
15	35202	35780	578	2	Interstitial	H2-02	H2	High
15	1033266	1034771	1505	2	Interstitial	H2-02	H2	High
15	62581	64876	2295	3	Interstitial	H2-02	H2	High
15	908446	916989	8543	3	Interstitial	H2-02	H2	High
15	793956	808413	14457	7	Interstitial	H2-02	H2	High
15	74178	81470	7292	9	Interstitial	H2-02	H2	High
16	37404	41600	4196	2	Interstitial	H2-02	H2	High
16	621047	623638	2591	2	Interstitial	H2-02	H2	High
16	774941	777395	2454	2	Interstitial	H2-02	H2	High
16	88259	92699	4440	4	Interstitial	H2-02	H2	High
16	317784	332973	15189	4	Interstitial	H2-02	H2	High
3	110194	110331	137	13	Interstitial	H2-03	H2	High
4	1003871	1006297	2426	4	Interstitial	H2-03	H2	High
7	831252	838401	7149	2	Interstitial	H2-03	H2	High
8	143273	526774	383501	49	Interstitial	H2-03	H2	High
9	385747	385994	247	2	Interstitial	H2-03	H2	High
11	161801	170422	8621	2	Interstitial	H2-03	H2	High
11	233168	234839	1671	2	Interstitial	H2-03	H2	High
11	348874	352366	3492	2	Interstitial	H2-03	H2	High
11	368763	369681	918	2	Interstitial	H2-03	H2	High
11	381565	385727	4162	2	Interstitial	H2-03	H2	High
11	469758	470833	1075	3	Interstitial	H2-03	H2	High
11	49845	55428	5583	7	Interstitial	H2-03	H2	High
12	440977	1050713	609736	80	Interstitial	H2-03	H2	High
13	220109	223347	3238	2	Interstitial	H2-03	H2	High
14	268264	271676	3412	2	Interstitial	H2-03	H2	High
14	423903	436141	12238	5	Interstitial	H2-03	H2	High
15	35237	36575	1338	2	Interstitial	H2-03	H2	High
15	154067	162115	8048	2	Interstitial	H2-03	H2	High
15	560940	565124	4184	2	Interstitial	H2-03	H2	High
15	995262	1002994	7732	2	Interstitial	H2-03	H2	High
15	788168	808413	20245	8	Interstitial	H2-03	H2	High
16	618380	619593	1213	2	Interstitial	H2-03	H2	High
16	55447	60219	4772	4	Interstitial	H2-03	H2	High
2	114134	116132	1998	2	Interstitial	H2-04	H2	High
2	140538	149210	8672	2	Interstitial	H2-04	H2	High
2	171027	174752	3725	2	Interstitial	H2-04	H2	High
2	288073	290502	2429	2	Interstitial	H2-04	H2	High
2	728327	730518	2191	2	Interstitial	H2-04	H2	High
2	743436	748794	5358	2	Interstitial	H2-04	H2	High
2	23266	45364	22098	10	Interstitial	H2-04	H2	High
3	105918	105974	56	2	Interstitial	H2-04	H2	High
3	204171	205704	1533	2	Interstitial	H2-04	H2	High
3	268687	269759	1072	5	Interstitial	H2-04	H2	High
4	1358362	1361250	2888	2	Interstitial	H2-04	H2	High
4	179312	179793	481	3	Interstitial	H2-04	H2	High
4	671231	673759	2528	3	Interstitial	H2-04	H2	High
4	846966	852294	5328	3	Interstitial	H2-04	H2	High
4	468814	472080	3266	9	Interstitial	H2-04	H2	High
4	955795	1082980	127185	20	Interstitial	H2-04	H2	High
4	1084842	1333103	248261	67	Interstitial	H2-04	H2	High
5	24378	25726	1348	2	Interstitial	H2-04	H2	High
5	280255	284530	4275	2	Interstitial	H2-04	H2	High
5	362841	368036	5195	2	Interstitial	H2-04	H2	High
5	298110	312492	14382	4	Interstitial	H2-04	H2	High
5	479322	488013	8691	5	Interstitial	H2-04	H2	High
6	104163	107098	2935	2	Interstitial	H2-04	H2	High
6	167931	172448	4517	2	Interstitial	H2-04	H2	High
7	347263	348279	1016	2	Interstitial	H2-04	H2	High
7	424437	424730	293	2	Interstitial	H2-04	H2	High
7	587309	589164	1855	2	Interstitial	H2-04	H2	High
7	774140	778289	4149	2	Interstitial	H2-04	H2	High
7	924555	928406	3851	2	Interstitial	H2-04	H2	High
7	219236	225949	6713	3	Interstitial	H2-04	H2	High
7	244859	248727	3868	3	Interstitial	H2-04	H2	High
7	253647	262016	8369	4	Interstitial	H2-04	H2	High
7	320539	333626	13087	35	Interstitial	H2-04	H2	High
8	310933	313174	2241	2	Interstitial	H2-04	H2	High
8	124690	126619	1929	3	Interstitial	H2-04	H2	High
8	525855	526774	919	3	Interstitial	H2-04	H2	High
8	30245	43926	13681	4	Interstitial	H2-04	H2	High
8	227647	245748	18101	6	Interstitial	H2-04	H2	High
9	387346	387460	114	3	Interstitial	H2-04	H2	High
9	26296	171346	145050	27	Interstitial	H2-04	H2	High
10	235240	243213	7973	2	Interstitial	H2-04	H2	High
10	249218	250226	1008	2	Interstitial	H2-04	H2	High
10	487102	489378	2276	2	Interstitial	H2-04	H2	High
10	691790	701842	10052	6	Interstitial	H2-04	H2	High
11	179128	179349	221	2	Interstitial	H2-04	H2	High
11	185122	186729	1607	2	Interstitial	H2-04	H2	High
11	233061	233764	703	2	Interstitial	H2-04	H2	High
11	142749	144958	2209	3	Interstitial	H2-04	H2	High
11	488959	491002	2043	3	Interstitial	H2-04	H2	High
12	509857	511939	2082	2	Interstitial	H2-04	H2	High
12	184054	187982	3928	3	Interstitial	H2-04	H2	High
12	26812	30847	4035	4	Interstitial	H2-04	H2	High
12	428295	475717	47422	42	Interstitial	H2-04	H2	High
13	298552	300427	1875	2	Interstitial	H2-04	H2	High
13	306034	307038	1004	2	Interstitial	H2-04	H2	High
13	322863	326009	3146	3	Interstitial	H2-04	H2	High
13	333034	335922	2888	3	Interstitial	H2-04	H2	High
13	610454	628129	17675	8	Interstitial	H2-04	H2	High
13	743838	761689	17851	10	Interstitial	H2-04	H2	High
14	203692	206208	2516	2	Interstitial	H2-04	H2	High
14	413108	418078	4970	2	Interstitial	H2-04	H2	High
14	615731	618392	2661	2	Interstitial	H2-04	H2	High
14	422283	434474	12191	6	Interstitial	H2-04	H2	High
15	61691	62700	1009	2	Interstitial	H2-04	H2	High
15	787581	790536	2955	3	Interstitial	H2-04	H2	High
15	83679	93144	9465	5	Interstitial	H2-04	H2	High
15	70152	72118	1966	6	Interstitial	H2-04	H2	High
15	1028966	1034771	5805	6	Interstitial	H2-04	H2	High
15	77359	81725	4366	8	Interstitial	H2-04	H2	High
1	179351	180156	805	2	Interstitial	H2-05	H2	High
1	180850	183548	2698	13	Interstitial	H2-05	H2	High
1	20512	81906	61394	32	Interstitial	H2-05	H2	High
1	183744	204734	20990	34	Interstitial	H2-05	H2	High
2	79173	79922	749	2	Interstitial	H2-05	H2	High
2	114134	116043	1909	2	Interstitial	H2-05	H2	High
2	345613	348209	2596	2	Interstitial	H2-05	H2	High
2	80729	85790	5061	3	Interstitial	H2-05	H2	High
2	154738	157049	2311	3	Interstitial	H2-05	H2	High
2	90687	92936	2249	4	Interstitial	H2-05	H2	High
2	103845	112837	8992	4	Interstitial	H2-05	H2	High
2	171027	175092	4065	4	Interstitial	H2-05	H2	High
2	282917	284440	1523	4	Interstitial	H2-05	H2	High
2	302089	306547	4458	4	Interstitial	H2-05	H2	High
2	160957	167284	6327	5	Interstitial	H2-05	H2	High
2	130040	149210	19170	6	Interstitial	H2-05	H2	High
2	22314	37826	15512	10	Interstitial	H2-05	H2	High
2	38759	64300	25541	16	Interstitial	H2-05	H2	High
2	480513	759720	279207	117	Interstitial	H2-05	H2	High
3	34723	38611	3888	2	Interstitial	H2-05	H2	High
3	67463	73880	6417	4	Interstitial	H2-05	H2	High
3	128345	128403	58	4	Interstitial	H2-05	H2	High
3	126361	126546	185	9	Interstitial	H2-05	H2	High
3	267532	269812	2280	10	Interstitial	H2-05	H2	High
3	204171	205867	1696	11	Interstitial	H2-05	H2	High
4	40162	41041	879	2	Interstitial	H2-05	H2	High
4	55682	58513	2831	2	Interstitial	H2-05	H2	High
4	216370	217108	738	2	Interstitial	H2-05	H2	High
4	1358362	1361250	2888	2	Interstitial	H2-05	H2	High
4	1418037	1419050	1013	2	Interstitial	H2-05	H2	High
4	22070	23288	1218	3	Interstitial	H2-05	H2	High
4	1259816	1266598	6782	5	Interstitial	H2-05	H2	High
4	1479066	1485236	6170	6	Interstitial	H2-05	H2	High
4	1277155	1280961	3806	8	Interstitial	H2-05	H2	High
4	471097	472778	1681	11	Interstitial	H2-05	H2	High
4	64384	204482	140098	73	Interstitial	H2-05	H2	High
4	312391	445158	132767	73	Interstitial	H2-05	H2	High
4	705585	1051972	346387	149	Interstitial	H2-05	H2	High
4	524452	696907	172455	174	Interstitial	H2-05	H2	High
5	69001	70336	1335	2	Interstitial	H2-05	H2	High
5	81425	86812	5387	2	Interstitial	H2-05	H2	High
5	99605	101814	2209	2	Interstitial	H2-05	H2	High
5	153014	156958	3944	2	Interstitial	H2-05	H2	High
5	222580	224439	1859	2	Interstitial	H2-05	H2	High
5	377760	378041	281	2	Interstitial	H2-05	H2	High
5	24378	25697	1319	3	Interstitial	H2-05	H2	High
5	467153	468536	1383	3	Interstitial	H2-05	H2	High
5	375243	377339	2096	5	Interstitial	H2-05	H2	High
5	402375	405920	3545	5	Interstitial	H2-05	H2	High
5	221010	222408	1398	6	Interstitial	H2-05	H2	High
5	346673	363564	16891	7	Interstitial	H2-05	H2	High
5	264097	341029	76932	54	Interstitial	H2-05	H2	High
6	102896	104953	2057	2	Interstitial	H2-05	H2	High
6	168263	172544	4281	3	Interstitial	H2-05	H2	High
6	214158	224724	10566	4	Interstitial	H2-05	H2	High
6	112001	115428	3427	7	Interstitial	H2-05	H2	High
7	54235	55735	1500	2	Interstitial	H2-05	H2	High
7	296609	299078	2469	2	Interstitial	H2-05	H2	High
7	351151	352161	1010	2	Interstitial	H2-05	H2	High
7	424437	424730	293	2	Interstitial	H2-05	H2	High
7	428374	431097	2723	2	Interstitial	H2-05	H2	High
7	587309	589164	1855	2	Interstitial	H2-05	H2	High
7	647263	650106	2843	2	Interstitial	H2-05	H2	High
7	316100	318164	2064	3	Interstitial	H2-05	H2	High
7	394384	397842	3458	3	Interstitial	H2-05	H2	High
7	1041786	1043827	2041	3	Interstitial	H2-05	H2	High
7	219236	226053	6817	4	Interstitial	H2-05	H2	High
7	244859	248934	4075	4	Interstitial	H2-05	H2	High
7	422042	422876	834	4	Interstitial	H2-05	H2	High
7	668650	671707	3057	4	Interstitial	H2-05	H2	High
7	697098	700950	3852	4	Interstitial	H2-05	H2	High
7	924555	928858	4303	4	Interstitial	H2-05	H2	High
7	230408	232509	2101	5	Interstitial	H2-05	H2	High
7	338641	341370	2729	5	Interstitial	H2-05	H2	High
7	1016613	1023550	6937	6	Interstitial	H2-05	H2	High
7	603589	620475	16886	10	Interstitial	H2-05	H2	High
7	479931	480402	471	11	Interstitial	H2-05	H2	High
7	319992	334505	14513	87	Interstitial	H2-05	H2	High
7	752163	900195	148032	124	Interstitial	H2-05	H2	High
8	58408	60027	1619	2	Interstitial	H2-05	H2	High
8	134745	143273	8528	2	Interstitial	H2-05	H2	High
8	311220	313174	1954	2	Interstitial	H2-05	H2	High
8	472595	475681	3086	2	Interstitial	H2-05	H2	High
8	318309	321009	2700	3	Interstitial	H2-05	H2	High
8	520869	521881	1012	3	Interstitial	H2-05	H2	High
8	35258	40336	5078	4	Interstitial	H2-05	H2	High
8	251852	263643	11791	4	Interstitial	H2-05	H2	High
8	123125	126619	3494	6	Interstitial	H2-05	H2	High
8	287504	289936	2432	7	Interstitial	H2-05	H2	High
8	324758	336127	11369	7	Interstitial	H2-05	H2	High
8	205119	212697	7578	8	Interstitial	H2-05	H2	High
8	227647	248648	21001	12	Interstitial	H2-05	H2	High
8	481656	518559	36903	32	Interstitial	H2-05	H2	High
9	385893	385994	101	2	Interstitial	H2-05	H2	High
9	409376	411901	2525	2	Interstitial	H2-05	H2	High
9	77253	100167	22914	5	Interstitial	H2-05	H2	High
9	398169	398720	551	6	Interstitial	H2-05	H2	High
9	399311	399578	267	6	Interstitial	H2-05	H2	High
9	149144	254077	104933	38	Interstitial	H2-05	H2	High
10	326122	332795	6673	2	Interstitial	H2-05	H2	High
10	348039	350378	2339	2	Interstitial	H2-05	H2	High
10	519784	522590	2806	2	Interstitial	H2-05	H2	High
10	553332	554362	1030	2	Interstitial	H2-05	H2	High
10	649594	652001	2407	2	Interstitial	H2-05	H2	High
10	249218	250340	1122	3	Interstitial	H2-05	H2	High
10	321083	321630	547	3	Interstitial	H2-05	H2	High
10	691082	693311	2229	4	Interstitial	H2-05	H2	High
10	555312	566747	11435	10	Interstitial	H2-05	H2	High
10	61168	99129	37961	22	Interstitial	H2-05	H2	High
11	66562	70610	4048	2	Interstitial	H2-05	H2	High
11	156132	156963	831	2	Interstitial	H2-05	H2	High
11	185630	185917	287	2	Interstitial	H2-05	H2	High
11	276588	278767	2179	2	Interstitial	H2-05	H2	High
11	371054	371702	648	2	Interstitial	H2-05	H2	High
11	387781	389831	2050	2	Interstitial	H2-05	H2	High
11	458951	459729	778	2	Interstitial	H2-05	H2	High
11	471212	472371	1159	2	Interstitial	H2-05	H2	High
11	111028	112151	1123	3	Interstitial	H2-05	H2	High
11	161801	168223	6422	3	Interstitial	H2-05	H2	High
11	233168	233764	596	3	Interstitial	H2-05	H2	High
11	348874	350261	1387	3	Interstitial	H2-05	H2	High
11	369302	369681	379	3	Interstitial	H2-05	H2	High
11	364499	366349	1850	4	Interstitial	H2-05	H2	High
11	488959	491298	2339	5	Interstitial	H2-05	H2	High
11	136169	137250	1081	6	Interstitial	H2-05	H2	High
11	140940	142293	1353	6	Interstitial	H2-05	H2	High
11	142749	144993	2244	6	Interstitial	H2-05	H2	High
11	179268	180310	1042	6	Interstitial	H2-05	H2	High
11	382120	385576	3456	7	Interstitial	H2-05	H2	High
11	524233	580829	56596	31	Interstitial	H2-05	H2	High
12	170084	172471	2387	2	Interstitial	H2-05	H2	High
12	389432	394208	4776	2	Interstitial	H2-05	H2	High
12	23210	56289	33079	21	Interstitial	H2-05	H2	High
12	521837	1050713	528876	321	Interstitial	H2-05	H2	High
13	63433	67331	3898	2	Interstitial	H2-05	H2	High
13	79272	82769	3497	2	Interstitial	H2-05	H2	High
13	188163	193292	5129	2	Interstitial	H2-05	H2	High
13	222269	223347	1078	2	Interstitial	H2-05	H2	High
13	557013	564949	7936	2	Interstitial	H2-05	H2	High
13	573616	584688	11072	2	Interstitial	H2-05	H2	High
13	332532	335494	2962	4	Interstitial	H2-05	H2	High
13	293433	299581	6148	5	Interstitial	H2-05	H2	High
13	349977	354465	4488	5	Interstitial	H2-05	H2	High
13	46253	59066	12813	6	Interstitial	H2-05	H2	High
13	304986	307507	2521	6	Interstitial	H2-05	H2	High
13	381540	392092	10552	6	Interstitial	H2-05	H2	High
13	616767	634317	17550	16	Interstitial	H2-05	H2	High
13	472624	532974	60350	20	Interstitial	H2-05	H2	High
14	84436	85360	924	2	Interstitial	H2-05	H2	High
14	128708	131047	2339	2	Interstitial	H2-05	H2	High
14	467289	476120	8831	2	Interstitial	H2-05	H2	High
14	123000	126107	3107	3	Interstitial	H2-05	H2	High
14	489039	494753	5714	3	Interstitial	H2-05	H2	High
14	605687	610266	4579	3	Interstitial	H2-05	H2	High
14	439199	451065	11866	11	Interstitial	H2-05	H2	High
14	142126	438392	296266	209	Interstitial	H2-05	H2	High
15	275553	276806	1253	2	Interstitial	H2-05	H2	High
15	35202	35780	578	3	Interstitial	H2-05	H2	High
15	342898	345560	2662	4	Interstitial	H2-05	H2	High
15	74062	82006	7944	5	Interstitial	H2-05	H2	High
15	154067	162115	8048	5	Interstitial	H2-05	H2	High
15	199763	217096	17333	8	Interstitial	H2-05	H2	High
15	83607	92349	8742	13	Interstitial	H2-05	H2	High
15	60460	65234	4774	14	Interstitial	H2-05	H2	High
15	68427	72118	3691	14	Interstitial	H2-05	H2	High
16	37404	39213	1809	2	Interstitial	H2-05	H2	High
16	176826	178508	1682	2	Interstitial	H2-05	H2	High
16	197654	198624	970	2	Interstitial	H2-05	H2	High
16	211981	213632	1651	2	Interstitial	H2-05	H2	High
16	455828	456130	302	2	Interstitial	H2-05	H2	High
16	542663	547966	5303	2	Interstitial	H2-05	H2	High
16	618380	618750	370	2	Interstitial	H2-05	H2	High
16	831457	833103	1646	2	Interstitial	H2-05	H2	High
16	97834	100739	2905	3	Interstitial	H2-05	H2	High
16	105832	107149	1317	3	Interstitial	H2-05	H2	High
16	621041	623754	2713	4	Interstitial	H2-05	H2	High
16	774941	784552	9611	4	Interstitial	H2-05	H2	High
16	136493	174712	38219	26	Interstitial	H2-05	H2	High
16	269980	438095	168115	104	Interstitial	H2-05	H2	High
2	345613	348209	2596	2	Interstitial	H2-06	H2	High
2	280607	284275	3668	3	Interstitial	H2-06	H2	High
4	22244	23954	1710	2	Interstitial	H2-06	H2	High
4	55682	60952	5270	2	Interstitial	H2-06	H2	High
4	1418037	1419084	1047	2	Interstitial	H2-06	H2	High
4	178997	179793	796	4	Interstitial	H2-06	H2	High
4	350969	352341	1372	6	Interstitial	H2-06	H2	High
7	230408	232274	1866	2	Interstitial	H2-06	H2	High
7	316100	318164	2064	2	Interstitial	H2-06	H2	High
7	846342	847673	1331	3	Interstitial	H2-06	H2	High
7	39666	40678	1012	4	Interstitial	H2-06	H2	High
7	319992	334548	14556	9	Interstitial	H2-06	H2	High
8	472595	475840	3245	2	Interstitial	H2-06	H2	High
8	297545	299307	1762	4	Interstitial	H2-06	H2	High
10	693703	704131	10428	3	Interstitial	H2-06	H2	High
10	352967	368275	15308	5	Interstitial	H2-06	H2	High
11	191162	201450	10288	2	Interstitial	H2-06	H2	High
11	460076	463134	3058	2	Interstitial	H2-06	H2	High
11	499036	502783	3747	2	Interstitial	H2-06	H2	High
11	540117	540937	820	3	Interstitial	H2-06	H2	High
12	599544	609097	9553	2	Interstitial	H2-06	H2	High
12	23210	76261	53051	5	Interstitial	H2-06	H2	High
14	128708	133196	4488	2	Interstitial	H2-06	H2	High
14	422052	423838	1786	2	Interstitial	H2-06	H2	High
14	437062	438392	1330	2	Interstitial	H2-06	H2	High
15	200761	217218	16457	2	Interstitial	H2-06	H2	High
15	883753	890840	7087	2	Interstitial	H2-06	H2	High
15	1028549	1029972	1423	2	Interstitial	H2-06	H2	High
15	1049808	1051161	1353	2	Interstitial	H2-06	H2	High
15	29336	29670	334	3	Interstitial	H2-06	H2	High
15	74889	78977	4088	7	Interstitial	H2-06	H2	High
16	53991	55997	2006	2	Interstitial	H2-06	H2	High
16	284533	286823	2290	2	Interstitial	H2-06	H2	High
16	618380	618750	370	2	Interstitial	H2-06	H2	High
1	179351	180156	805	2	Interstitial	H2-07	H2	High
1	185217	186093	876	10	Interstitial	H2-07	H2	High
2	56970	64300	7330	2	Interstitial	H2-07	H2	High
2	114134	116043	1909	2	Interstitial	H2-07	H2	High
2	154738	157049	2311	2	Interstitial	H2-07	H2	High
2	303218	306547	3329	2	Interstitial	H2-07	H2	High
2	345613	348209	2596	2	Interstitial	H2-07	H2	High
2	697572	702934	5362	2	Interstitial	H2-07	H2	High
2	650740	660442	9702	3	Interstitial	H2-07	H2	High
2	80729	86217	5488	4	Interstitial	H2-07	H2	High
2	90687	92936	2249	4	Interstitial	H2-07	H2	High
2	103845	112837	8992	4	Interstitial	H2-07	H2	High
2	282917	284440	1523	4	Interstitial	H2-07	H2	High
2	636539	640385	3846	4	Interstitial	H2-07	H2	High
2	728073	728775	702	4	Interstitial	H2-07	H2	High
2	22314	37826	15512	5	Interstitial	H2-07	H2	High
2	160957	167284	6327	5	Interstitial	H2-07	H2	High
2	717238	722053	4815	6	Interstitial	H2-07	H2	High
3	34723	38611	3888	2	Interstitial	H2-07	H2	High
3	126657	126822	165	2	Interstitial	H2-07	H2	High
3	128420	128467	47	2	Interstitial	H2-07	H2	High
3	204171	204708	537	2	Interstitial	H2-07	H2	High
3	108434	108527	93	3	Interstitial	H2-07	H2	High
3	67548	73880	6332	5	Interstitial	H2-07	H2	High
3	118576	118620	44	6	Interstitial	H2-07	H2	High
3	122224	122308	84	6	Interstitial	H2-07	H2	High
3	267532	269812	2280	10	Interstitial	H2-07	H2	High
4	40162	41041	879	2	Interstitial	H2-07	H2	High
4	59941	61431	1490	2	Interstitial	H2-07	H2	High
4	216370	217108	738	2	Interstitial	H2-07	H2	High
4	346448	346941	493	2	Interstitial	H2-07	H2	High
4	413484	413584	100	2	Interstitial	H2-07	H2	High
4	419564	422305	2741	2	Interstitial	H2-07	H2	High
4	679314	679678	364	2	Interstitial	H2-07	H2	High
4	681277	686645	5368	2	Interstitial	H2-07	H2	High
4	1259816	1262106	2290	2	Interstitial	H2-07	H2	High
4	1358362	1361250	2888	2	Interstitial	H2-07	H2	High
4	1418037	1419050	1013	2	Interstitial	H2-07	H2	High
4	22070	23288	1218	3	Interstitial	H2-07	H2	High
4	705585	717155	11570	3	Interstitial	H2-07	H2	High
4	832882	836590	3708	3	Interstitial	H2-07	H2	High
4	846966	852294	5328	3	Interstitial	H2-07	H2	High
4	1041799	1049011	7212	3	Interstitial	H2-07	H2	High
4	694353	696907	2554	4	Interstitial	H2-07	H2	High
4	1003871	1006297	2426	4	Interstitial	H2-07	H2	High
4	124777	134783	10006	5	Interstitial	H2-07	H2	High
4	352041	352391	350	5	Interstitial	H2-07	H2	High
4	661361	671889	10528	5	Interstitial	H2-07	H2	High
4	1479066	1485236	6170	5	Interstitial	H2-07	H2	High
4	239883	242280	2397	7	Interstitial	H2-07	H2	High
4	471097	472778	1681	12	Interstitial	H2-07	H2	High
5	69001	70336	1335	2	Interstitial	H2-07	H2	High
5	99605	101814	2209	2	Interstitial	H2-07	H2	High
5	153014	156958	3944	2	Interstitial	H2-07	H2	High
5	339205	341029	1824	2	Interstitial	H2-07	H2	High
5	377760	378041	281	2	Interstitial	H2-07	H2	High
5	280255	282715	2460	5	Interstitial	H2-07	H2	High
5	287589	290346	2757	5	Interstitial	H2-07	H2	High
5	375243	377339	2096	5	Interstitial	H2-07	H2	High
5	402375	405920	3545	5	Interstitial	H2-07	H2	High
5	346673	363564	16891	7	Interstitial	H2-07	H2	High
6	102896	104953	2057	2	Interstitial	H2-07	H2	High
6	112001	115529	3528	9	Interstitial	H2-07	H2	High
7	351151	352161	1010	2	Interstitial	H2-07	H2	High
7	394384	397711	3327	2	Interstitial	H2-07	H2	High
7	424437	424730	293	2	Interstitial	H2-07	H2	High
7	428374	431097	2723	2	Interstitial	H2-07	H2	High
7	479931	480388	457	2	Interstitial	H2-07	H2	High
7	775730	778289	2559	2	Interstitial	H2-07	H2	High
7	843693	844619	926	2	Interstitial	H2-07	H2	High
7	886970	892253	5283	2	Interstitial	H2-07	H2	High
7	1009876	1011027	1151	2	Interstitial	H2-07	H2	High
7	294861	299078	4217	3	Interstitial	H2-07	H2	High
7	316100	318164	2064	3	Interstitial	H2-07	H2	High
7	831252	834231	2979	3	Interstitial	H2-07	H2	High
7	219236	226053	6817	4	Interstitial	H2-07	H2	High
7	230408	232509	2101	4	Interstitial	H2-07	H2	High
7	244859	248934	4075	4	Interstitial	H2-07	H2	High
7	338722	341370	2648	4	Interstitial	H2-07	H2	High
7	422042	422876	834	4	Interstitial	H2-07	H2	High
7	647263	652386	5123	4	Interstitial	H2-07	H2	High
7	668650	671707	3057	4	Interstitial	H2-07	H2	High
7	697098	700950	3852	4	Interstitial	H2-07	H2	High
7	924555	928858	4303	4	Interstitial	H2-07	H2	High
7	1016613	1023550	6937	5	Interstitial	H2-07	H2	High
7	755937	767320	11383	6	Interstitial	H2-07	H2	High
8	205119	206959	1840	2	Interstitial	H2-07	H2	High
8	311220	313174	1954	2	Interstitial	H2-07	H2	High
8	324758	328490	3732	2	Interstitial	H2-07	H2	High
8	472595	475681	3086	2	Interstitial	H2-07	H2	High
8	504423	505788	1365	2	Interstitial	H2-07	H2	High
8	318309	321009	2700	3	Interstitial	H2-07	H2	High
8	35258	40336	5078	4	Interstitial	H2-07	H2	High
8	123125	126481	3356	4	Interstitial	H2-07	H2	High
8	506600	518559	11959	6	Interstitial	H2-07	H2	High
8	287504	289936	2432	7	Interstitial	H2-07	H2	High
8	227647	248648	21001	13	Interstitial	H2-07	H2	High
8	481656	491465	9809	13	Interstitial	H2-07	H2	High
9	385893	385994	101	2	Interstitial	H2-07	H2	High
9	383468	384920	1452	3	Interstitial	H2-07	H2	High
9	399311	399578	267	4	Interstitial	H2-07	H2	High
9	398169	398720	551	6	Interstitial	H2-07	H2	High
10	249508	250340	832	2	Interstitial	H2-07	H2	High
10	326122	332795	6673	2	Interstitial	H2-07	H2	High
10	348039	350378	2339	2	Interstitial	H2-07	H2	High
10	519784	522590	2806	2	Interstitial	H2-07	H2	High
10	553332	554362	1030	2	Interstitial	H2-07	H2	High
10	575264	577112	1848	2	Interstitial	H2-07	H2	High
10	649594	652001	2407	2	Interstitial	H2-07	H2	High
10	71342	71998	656	3	Interstitial	H2-07	H2	High
10	321083	321630	547	3	Interstitial	H2-07	H2	High
10	691082	693311	2229	4	Interstitial	H2-07	H2	High
10	555312	566747	11435	9	Interstitial	H2-07	H2	High
11	66562	70610	4048	2	Interstitial	H2-07	H2	High
11	161801	168223	6422	2	Interstitial	H2-07	H2	High
11	179795	180310	515	2	Interstitial	H2-07	H2	High
11	185630	185917	287	2	Interstitial	H2-07	H2	High
11	276588	278767	2179	2	Interstitial	H2-07	H2	High
11	371054	371702	648	2	Interstitial	H2-07	H2	High
11	387781	389831	2050	2	Interstitial	H2-07	H2	High
11	458951	459729	778	2	Interstitial	H2-07	H2	High
11	540117	540937	820	2	Interstitial	H2-07	H2	High
11	111028	112151	1123	3	Interstitial	H2-07	H2	High
11	348874	350261	1387	3	Interstitial	H2-07	H2	High
11	369302	369681	379	3	Interstitial	H2-07	H2	High
11	488959	491298	2339	4	Interstitial	H2-07	H2	High
11	136169	137226	1057	5	Interstitial	H2-07	H2	High
11	469758	472371	2613	5	Interstitial	H2-07	H2	High
11	140940	142308	1368	6	Interstitial	H2-07	H2	High
11	382120	385576	3456	7	Interstitial	H2-07	H2	High
12	803221	803628	407	2	Interstitial	H2-07	H2	High
12	803769	806166	2397	3	Interstitial	H2-07	H2	High
12	751289	767219	15930	13	Interstitial	H2-07	H2	High
12	771809	798418	26609	18	Interstitial	H2-07	H2	High
12	241139	747168	506029	199	Interstitial	H2-07	H2	High
13	63433	67331	3898	2	Interstitial	H2-07	H2	High
13	79272	82769	3497	2	Interstitial	H2-07	H2	High
13	188163	193292	5129	2	Interstitial	H2-07	H2	High
13	222269	223347	1078	2	Interstitial	H2-07	H2	High
13	298552	299581	1029	2	Interstitial	H2-07	H2	High
13	332532	335494	2962	4	Interstitial	H2-07	H2	High
13	304986	307507	2521	6	Interstitial	H2-07	H2	High
13	381540	392092	10552	6	Interstitial	H2-07	H2	High
13	46253	59066	12813	7	Interstitial	H2-07	H2	High
13	616767	634317	17550	17	Interstitial	H2-07	H2	High
14	244006	245189	1183	2	Interstitial	H2-07	H2	High
14	256138	256319	181	2	Interstitial	H2-07	H2	High
14	395060	399382	4322	2	Interstitial	H2-07	H2	High
14	411404	412111	707	2	Interstitial	H2-07	H2	High
14	437537	438392	855	2	Interstitial	H2-07	H2	High
14	605889	610266	4377	2	Interstitial	H2-07	H2	High
14	615731	616863	1132	2	Interstitial	H2-07	H2	High
14	694728	695079	351	2	Interstitial	H2-07	H2	High
14	84304	85360	1056	3	Interstitial	H2-07	H2	High
14	123000	126107	3107	3	Interstitial	H2-07	H2	High
14	231295	233063	1768	3	Interstitial	H2-07	H2	High
14	419354	421191	1837	3	Interstitial	H2-07	H2	High
14	489039	494753	5714	3	Interstitial	H2-07	H2	High
14	745665	749841	4176	3	Interstitial	H2-07	H2	High
14	225882	228993	3111	4	Interstitial	H2-07	H2	High
14	439199	451065	11866	11	Interstitial	H2-07	H2	High
14	422283	436141	13858	17	Interstitial	H2-07	H2	High
15	275553	276806	1253	2	Interstitial	H2-07	H2	High
15	1051129	1051212	83	2	Interstitial	H2-07	H2	High
15	80601	82006	1405	3	Interstitial	H2-07	H2	High
15	447525	448137	612	3	Interstitial	H2-07	H2	High
15	464413	466147	1734	3	Interstitial	H2-07	H2	High
15	83154	84430	1276	4	Interstitial	H2-07	H2	High
15	822163	823080	917	4	Interstitial	H2-07	H2	High
15	908446	916989	8543	4	Interstitial	H2-07	H2	High
15	88105	92349	4244	5	Interstitial	H2-07	H2	High
15	154067	162115	8048	5	Interstitial	H2-07	H2	High
15	749219	751779	2560	5	Interstitial	H2-07	H2	High
15	777411	780426	3015	5	Interstitial	H2-07	H2	High
15	68427	69980	1553	7	Interstitial	H2-07	H2	High
15	62126	65234	3108	10	Interstitial	H2-07	H2	High
15	29373	35780	6407	11	Interstitial	H2-07	H2	High
15	792074	809266	17192	16	Interstitial	H2-07	H2	High
16	176826	178508	1682	2	Interstitial	H2-07	H2	High
16	197654	198624	970	2	Interstitial	H2-07	H2	High
16	286504	286908	404	2	Interstitial	H2-07	H2	High
16	306888	308133	1245	2	Interstitial	H2-07	H2	High
16	343339	344834	1495	2	Interstitial	H2-07	H2	High
16	455828	456130	302	2	Interstitial	H2-07	H2	High
16	542663	547966	5303	2	Interstitial	H2-07	H2	High
16	618380	618750	370	2	Interstitial	H2-07	H2	High
16	831457	833103	1646	2	Interstitial	H2-07	H2	High
16	412095	416541	4446	3	Interstitial	H2-07	H2	High
16	621047	623754	2707	4	Interstitial	H2-07	H2	High
16	774941	784552	9611	4	Interstitial	H2-07	H2	High
16	300089	304598	4509	5	Interstitial	H2-07	H2	High
16	399020	406676	7656	5	Interstitial	H2-07	H2	High
16	84073	87867	3794	6	Interstitial	H2-07	H2	High
1	21730	186418	164688	32	Interstitial	H2-08	H2	High
3	118313	292264	173951	159	Interstitial	H2-08	H2	High
8	198463	526791	328328	85	Interstitial	H2-08	H2	High
14	25569	255751	230182	29	Interstitial	H2-08	H2	High
15	29411	1064600	1035189	277	Interstitial	H2-08	H2	High
2	90687	94080	3393	2	Interstitial	H2-09	H2	High
2	302913	306547	3634	2	Interstitial	H2-09	H2	High
2	654307	661757	7450	2	Interstitial	H2-09	H2	High
2	717238	722246	5008	2	Interstitial	H2-09	H2	High
2	170648	175051	4403	3	Interstitial	H2-09	H2	High
4	346448	346941	493	2	Interstitial	H2-09	H2	High
4	695248	696907	1659	2	Interstitial	H2-09	H2	High
4	1041799	1051972	10173	2	Interstitial	H2-09	H2	High
4	178596	179700	1104	3	Interstitial	H2-09	H2	High
4	471726	472350	624	3	Interstitial	H2-09	H2	High
4	972164	978103	5939	3	Interstitial	H2-09	H2	High
4	980247	1001095	20848	5	Interstitial	H2-09	H2	High
4	350753	353560	2807	6	Interstitial	H2-09	H2	High
5	346673	349065	2392	2	Interstitial	H2-09	H2	High
5	288334	312062	23728	8	Interstitial	H2-09	H2	High
7	219795	226053	6258	2	Interstitial	H2-09	H2	High
7	391229	393753	2524	2	Interstitial	H2-09	H2	High
7	647263	650106	2843	2	Interstitial	H2-09	H2	High
7	697239	700950	3711	2	Interstitial	H2-09	H2	High
7	761644	767023	5379	2	Interstitial	H2-09	H2	High
7	1020246	1023550	3304	2	Interstitial	H2-09	H2	High
8	21595	22517	922	2	Interstitial	H2-09	H2	High
8	134745	143273	8528	2	Interstitial	H2-09	H2	High
8	205119	206959	1840	2	Interstitial	H2-09	H2	High
8	373998	374510	512	2	Interstitial	H2-09	H2	High
8	481656	484988	3332	2	Interstitial	H2-09	H2	High
8	526912	534139	7227	3	Interstitial	H2-09	H2	High
8	330465	338876	8411	5	Interstitial	H2-09	H2	High
10	321131	321630	499	2	Interstitial	H2-09	H2	High
10	553332	554538	1206	2	Interstitial	H2-09	H2	High
10	693703	701842	8139	4	Interstitial	H2-09	H2	High
11	111293	112151	858	2	Interstitial	H2-09	H2	High
11	387183	387768	585	2	Interstitial	H2-09	H2	High
11	471212	474127	2915	2	Interstitial	H2-09	H2	High
11	136834	138653	1819	3	Interstitial	H2-09	H2	High
11	143546	145516	1970	3	Interstitial	H2-09	H2	High
11	140236	142301	2065	4	Interstitial	H2-09	H2	High
12	795914	798418	2504	2	Interstitial	H2-09	H2	High
14	244006	245189	1183	2	Interstitial	H2-09	H2	High
14	605687	609867	4180	2	Interstitial	H2-09	H2	High
14	615731	616863	1132	2	Interstitial	H2-09	H2	High
14	745665	750321	4656	2	Interstitial	H2-09	H2	High
15	446157	448078	1921	2	Interstitial	H2-09	H2	High
15	584398	586215	1817	2	Interstitial	H2-09	H2	High
15	787263	790633	3370	3	Interstitial	H2-09	H2	High
15	792138	804329	12191	3	Interstitial	H2-09	H2	High
15	875175	1053430	178255	45	Interstitial	H2-09	H2	High
16	286504	293536	7032	2	Interstitial	H2-09	H2	High
16	397043	407638	10595	2	Interstitial	H2-09	H2	High
16	774941	784552	9611	4	Interstitial	H2-09	H2	High
2	56970	64300	7330	2	Interstitial	H2-10	H2	High
2	654657	661757	7100	2	Interstitial	H2-10	H2	High
2	282917	286992	4075	3	Interstitial	H2-10	H2	High
3	118162	118193	31	2	Interstitial	H2-10	H2	High
3	205244	206769	1525	2	Interstitial	H2-10	H2	High
4	352486	354082	1596	2	Interstitial	H2-10	H2	High
4	1267627	1269862	2235	2	Interstitial	H2-10	H2	High
4	178273	179723	1450	4	Interstitial	H2-10	H2	High
4	980247	1000658	20411	4	Interstitial	H2-10	H2	High
5	290884	295716	4832	2	Interstitial	H2-10	H2	High
5	405772	415269	9497	3	Interstitial	H2-10	H2	High
7	316360	318164	1804	2	Interstitial	H2-10	H2	High
7	328455	334505	6050	2	Interstitial	H2-10	H2	High
7	257154	262748	5594	3	Interstitial	H2-10	H2	High
7	351151	361793	10642	3	Interstitial	H2-10	H2	High
7	1049749	1051486	1737	3	Interstitial	H2-10	H2	High
8	21907	24036	2129	2	Interstitial	H2-10	H2	High
8	318309	321009	2700	2	Interstitial	H2-10	H2	High
8	335810	337610	1800	2	Interstitial	H2-10	H2	High
8	477476	480084	2608	2	Interstitial	H2-10	H2	High
8	493372	502276	8904	2	Interstitial	H2-10	H2	High
8	297401	299045	1644	4	Interstitial	H2-10	H2	High
11	143007	145311	2304	2	Interstitial	H2-10	H2	High
11	463539	470833	7294	4	Interstitial	H2-10	H2	High
12	197295	440499	243204	31	Interstitial	H2-10	H2	High
12	443452	1042661	599209	87	Interstitial	H2-10	H2	High
13	53790	60089	6299	3	Interstitial	H2-10	H2	High
13	347384	353791	6407	4	Interstitial	H2-10	H2	High
14	223691	229043	5352	2	Interstitial	H2-10	H2	High
14	237451	241704	4253	2	Interstitial	H2-10	H2	High
14	439199	443905	4706	3	Interstitial	H2-10	H2	High
14	78069	85360	7291	5	Interstitial	H2-10	H2	High
15	70152	72046	1894	3	Interstitial	H2-10	H2	High
15	83607	84400	793	3	Interstitial	H2-10	H2	High
15	1021656	1027235	5579	3	Interstitial	H2-10	H2	High
15	1051147	1052924	1777	5	Interstitial	H2-10	H2	High
16	310189	315237	5048	5	Interstitial	H2-10	H2	High
1	184405	185682	1277	6	Interstitial	H2-11	H2	High
2	80729	85227	4498	2	Interstitial	H2-11	H2	High
2	112419	112837	418	2	Interstitial	H2-11	H2	High
2	114134	116132	1998	2	Interstitial	H2-11	H2	High
2	130175	138184	8009	2	Interstitial	H2-11	H2	High
2	171935	175092	3157	2	Interstitial	H2-11	H2	High
2	636539	638868	2329	2	Interstitial	H2-11	H2	High
2	650098	658528	8430	2	Interstitial	H2-11	H2	High
2	728083	728775	692	2	Interstitial	H2-11	H2	High
2	784457	788464	4007	2	Interstitial	H2-11	H2	High
3	269906	276750	6844	2	Interstitial	H2-11	H2	High
3	104551	104608	57	3	Interstitial	H2-11	H2	High
3	119536	119675	139	3	Interstitial	H2-11	H2	High
3	122215	122258	43	3	Interstitial	H2-11	H2	High
3	123777	126052	2275	3	Interstitial	H2-11	H2	High
3	129330	129461	131	3	Interstitial	H2-11	H2	High
3	115634	117565	1931	9	Interstitial	H2-11	H2	High
4	21027	21719	692	2	Interstitial	H2-11	H2	High
4	47281	54390	7109	2	Interstitial	H2-11	H2	High
4	127731	134783	7052	2	Interstitial	H2-11	H2	High
4	671085	674367	3282	2	Interstitial	H2-11	H2	High
4	681277	686645	5368	2	Interstitial	H2-11	H2	High
4	954360	958642	4282	2	Interstitial	H2-11	H2	High
4	1041799	1048968	7169	2	Interstitial	H2-11	H2	High
4	1480971	1485658	4687	2	Interstitial	H2-11	H2	High
4	987574	1000658	13084	4	Interstitial	H2-11	H2	High
4	471134	472350	1216	6	Interstitial	H2-11	H2	High
4	1264988	1270028	5040	7	Interstitial	H2-11	H2	High
5	159884	163996	4112	2	Interstitial	H2-11	H2	High
5	222580	224439	1859	2	Interstitial	H2-11	H2	High
5	66567	70336	3769	3	Interstitial	H2-11	H2	High
5	375243	377339	2096	4	Interstitial	H2-11	H2	High
7	131359	139627	8268	2	Interstitial	H2-11	H2	High
7	394384	399030	4646	2	Interstitial	H2-11	H2	High
7	715326	718248	2922	2	Interstitial	H2-11	H2	High
7	761644	767023	5379	2	Interstitial	H2-11	H2	High
7	831423	834231	2808	2	Interstitial	H2-11	H2	High
7	843693	844619	926	2	Interstitial	H2-11	H2	High
7	924555	928858	4303	3	Interstitial	H2-11	H2	High
7	254567	273449	18882	13	Interstitial	H2-11	H2	High
7	941121	1066837	125716	16	Interstitial	H2-11	H2	High
8	134745	143273	8528	2	Interstitial	H2-11	H2	High
8	525855	526791	936	4	Interstitial	H2-11	H2	High
10	249218	250340	1122	2	Interstitial	H2-11	H2	High
10	328600	335144	6544	2	Interstitial	H2-11	H2	High
10	519784	522590	2806	2	Interstitial	H2-11	H2	High
10	553332	554362	1030	2	Interstitial	H2-11	H2	High
10	712354	716758	4404	2	Interstitial	H2-11	H2	High
10	556117	564653	8536	3	Interstitial	H2-11	H2	High
10	691082	693311	2229	3	Interstitial	H2-11	H2	High
11	111293	112151	858	2	Interstitial	H2-11	H2	High
11	156321	158868	2547	2	Interstitial	H2-11	H2	High
11	379174	379409	235	2	Interstitial	H2-11	H2	High
11	459166	460519	1353	2	Interstitial	H2-11	H2	High
11	540117	540937	820	2	Interstitial	H2-11	H2	High
11	381322	385139	3817	3	Interstitial	H2-11	H2	High
11	136169	137250	1081	4	Interstitial	H2-11	H2	High
11	432700	449564	16864	4	Interstitial	H2-11	H2	High
12	633215	645087	11872	2	Interstitial	H2-11	H2	High
12	882617	888968	6351	2	Interstitial	H2-11	H2	High
12	937719	946143	8424	2	Interstitial	H2-11	H2	High
12	978377	986758	8381	2	Interstitial	H2-11	H2	High
12	589296	606001	16705	9	Interstitial	H2-11	H2	High
13	43911	49612	5701	2	Interstitial	H2-11	H2	High
13	78961	86078	7117	2	Interstitial	H2-11	H2	High
13	188163	193372	5209	2	Interstitial	H2-11	H2	High
13	573616	584688	11072	2	Interstitial	H2-11	H2	High
14	467289	476120	8831	2	Interstitial	H2-11	H2	High
14	745665	749841	4176	3	Interstitial	H2-11	H2	High
14	75794	83002	7208	4	Interstitial	H2-11	H2	High
14	446177	451065	4888	5	Interstitial	H2-11	H2	High
15	313549	320937	7388	2	Interstitial	H2-11	H2	High
15	29614	34811	5197	3	Interstitial	H2-11	H2	High
15	74326	78376	4050	3	Interstitial	H2-11	H2	High
15	446052	448006	1954	3	Interstitial	H2-11	H2	High
15	560940	564454	3514	3	Interstitial	H2-11	H2	High
15	84506	92178	7672	4	Interstitial	H2-11	H2	High
16	542177	547966	5789	2	Interstitial	H2-11	H2	High
16	826455	828612	2157	2	Interstitial	H2-11	H2	High
1	188443	189728	1285	2	Interstitial	H2-12	H2	High
1	184405	185620	1215	5	Interstitial	H2-12	H2	High
2	660791	661757	966	2	Interstitial	H2-12	H2	High
2	171027	175092	4065	3	Interstitial	H2-12	H2	High
2	664753	722053	57300	17	Interstitial	H2-12	H2	High
2	250343	495519	245176	100	Interstitial	H2-12	H2	High
3	34723	38611	3888	2	Interstitial	H2-12	H2	High
3	107976	108056	80	4	Interstitial	H2-12	H2	High
3	67192	73880	6688	5	Interstitial	H2-12	H2	High
3	204171	205867	1696	7	Interstitial	H2-12	H2	High
4	55682	58513	2831	2	Interstitial	H2-12	H2	High
4	59941	61431	1490	2	Interstitial	H2-12	H2	High
4	346448	346941	493	2	Interstitial	H2-12	H2	High
4	413484	413584	100	2	Interstitial	H2-12	H2	High
4	679314	679678	364	2	Interstitial	H2-12	H2	High
4	681277	686645	5368	2	Interstitial	H2-12	H2	High
4	694353	694753	400	2	Interstitial	H2-12	H2	High
4	832882	835767	2885	2	Interstitial	H2-12	H2	High
4	930213	934227	4014	2	Interstitial	H2-12	H2	High
4	1259816	1262106	2290	2	Interstitial	H2-12	H2	High
4	1358362	1361250	2888	2	Interstitial	H2-12	H2	High
4	1418037	1419050	1013	2	Interstitial	H2-12	H2	High
4	1429422	1430023	601	2	Interstitial	H2-12	H2	High
4	1479066	1480010	944	2	Interstitial	H2-12	H2	High
4	22070	23288	1218	3	Interstitial	H2-12	H2	High
4	40162	41736	1574	3	Interstitial	H2-12	H2	High
4	385949	386420	471	3	Interstitial	H2-12	H2	High
4	705585	717155	11570	3	Interstitial	H2-12	H2	High
4	846562	852294	5732	3	Interstitial	H2-12	H2	High
4	972164	978103	5939	4	Interstitial	H2-12	H2	High
4	996953	1001095	4142	4	Interstitial	H2-12	H2	High
4	1003871	1006297	2426	4	Interstitial	H2-12	H2	High
4	661361	671889	10528	5	Interstitial	H2-12	H2	High
4	885676	891780	6104	5	Interstitial	H2-12	H2	High
4	239883	242280	2397	6	Interstitial	H2-12	H2	High
4	471097	471580	483	7	Interstitial	H2-12	H2	High
4	538685	595501	56816	23	Interstitial	H2-12	H2	High
4	1061513	1195933	134420	64	Interstitial	H2-12	H2	High
5	81425	86812	5387	2	Interstitial	H2-12	H2	High
5	153014	156958	3944	2	Interstitial	H2-12	H2	High
5	222580	224439	1859	2	Interstitial	H2-12	H2	High
5	346673	349065	2392	2	Interstitial	H2-12	H2	High
5	355749	362646	6897	2	Interstitial	H2-12	H2	High
5	375243	375911	668	2	Interstitial	H2-12	H2	High
5	24378	25697	1319	3	Interstitial	H2-12	H2	High
5	400415	405728	5313	3	Interstitial	H2-12	H2	High
5	221010	222408	1398	4	Interstitial	H2-12	H2	High
5	280255	282715	2460	4	Interstitial	H2-12	H2	High
5	287589	290346	2757	7	Interstitial	H2-12	H2	High
5	38674	66567	27893	11	Interstitial	H2-12	H2	High
6	102896	104953	2057	2	Interstitial	H2-12	H2	High
6	167931	172448	4517	2	Interstitial	H2-12	H2	High
6	112001	115529	3528	7	Interstitial	H2-12	H2	High
7	60474	64468	3994	2	Interstitial	H2-12	H2	High
7	428374	431357	2983	2	Interstitial	H2-12	H2	High
7	479931	480388	457	2	Interstitial	H2-12	H2	High
7	587309	589164	1855	2	Interstitial	H2-12	H2	High
7	775730	778289	2559	2	Interstitial	H2-12	H2	High
7	797628	798074	446	2	Interstitial	H2-12	H2	High
7	843693	844619	926	2	Interstitial	H2-12	H2	High
7	993491	997366	3875	2	Interstitial	H2-12	H2	High
7	394384	397842	3458	3	Interstitial	H2-12	H2	High
7	424437	424993	556	3	Interstitial	H2-12	H2	High
7	831252	834231	2979	3	Interstitial	H2-12	H2	High
7	924555	928858	4303	3	Interstitial	H2-12	H2	High
7	219236	226053	6817	4	Interstitial	H2-12	H2	High
7	846342	853113	6771	5	Interstitial	H2-12	H2	High
7	1016613	1023550	6937	5	Interstitial	H2-12	H2	High
7	647299	752163	104864	37	Interstitial	H2-12	H2	High
7	230408	378227	147819	103	Interstitial	H2-12	H2	High
8	134745	143273	8528	2	Interstitial	H2-12	H2	High
8	205119	206959	1840	2	Interstitial	H2-12	H2	High
8	324758	328490	3732	2	Interstitial	H2-12	H2	High
8	472595	475681	3086	2	Interstitial	H2-12	H2	High
8	318309	321009	2700	3	Interstitial	H2-12	H2	High
8	520869	521881	1012	3	Interstitial	H2-12	H2	High
8	485816	491465	5649	5	Interstitial	H2-12	H2	High
8	506600	518559	11959	5	Interstitial	H2-12	H2	High
8	121403	126619	5216	6	Interstitial	H2-12	H2	High
8	227647	248648	21001	10	Interstitial	H2-12	H2	High
8	259205	317412	58207	42	Interstitial	H2-12	H2	High
9	383468	384920	1452	2	Interstitial	H2-12	H2	High
9	385893	385994	101	2	Interstitial	H2-12	H2	High
9	77253	94396	17143	4	Interstitial	H2-12	H2	High
9	399311	399578	267	6	Interstitial	H2-12	H2	High
10	249508	250340	832	2	Interstitial	H2-12	H2	High
10	321131	321630	499	2	Interstitial	H2-12	H2	High
10	326122	332795	6673	2	Interstitial	H2-12	H2	High
10	348039	350378	2339	2	Interstitial	H2-12	H2	High
10	519784	522590	2806	2	Interstitial	H2-12	H2	High
10	71335	72081	746	6	Interstitial	H2-12	H2	High
11	66562	70610	4048	2	Interstitial	H2-12	H2	High
11	348874	350076	1202	2	Interstitial	H2-12	H2	High
11	458951	459729	778	2	Interstitial	H2-12	H2	High
11	491113	491298	185	2	Interstitial	H2-12	H2	High
11	517997	524233	6236	2	Interstitial	H2-12	H2	High
11	540117	540827	710	2	Interstitial	H2-12	H2	High
11	233168	233764	596	3	Interstitial	H2-12	H2	High
11	469758	470833	1075	3	Interstitial	H2-12	H2	High
11	100826	205123	104297	105	Interstitial	H2-12	H2	High
11	369302	430141	60839	107	Interstitial	H2-12	H2	High
12	796489	798418	1929	2	Interstitial	H2-12	H2	High
12	808354	808538	184	2	Interstitial	H2-12	H2	High
12	166279	170084	3805	3	Interstitial	H2-12	H2	High
12	490720	638040	147320	50	Interstitial	H2-12	H2	High
12	824038	1047957	223919	99	Interstitial	H2-12	H2	High
13	222269	223347	1078	2	Interstitial	H2-12	H2	High
13	298552	299581	1029	2	Interstitial	H2-12	H2	High
13	350098	354465	4367	3	Interstitial	H2-12	H2	High
13	332532	335494	2962	4	Interstitial	H2-12	H2	High
13	304986	307507	2521	6	Interstitial	H2-12	H2	High
13	381540	392092	10552	6	Interstitial	H2-12	H2	High
13	540177	613478	73301	30	Interstitial	H2-12	H2	High
13	30555	146892	116337	60	Interstitial	H2-12	H2	High
13	697766	833657	135891	99	Interstitial	H2-12	H2	High
14	123000	126107	3107	2	Interstitial	H2-12	H2	High
14	171744	174660	2916	2	Interstitial	H2-12	H2	High
14	203692	206208	2516	2	Interstitial	H2-12	H2	High
14	231787	233063	1276	2	Interstitial	H2-12	H2	High
14	237960	241704	3744	2	Interstitial	H2-12	H2	High
14	248516	251734	3218	2	Interstitial	H2-12	H2	High
14	256138	256319	181	2	Interstitial	H2-12	H2	High
14	395081	399382	4301	2	Interstitial	H2-12	H2	High
14	411404	412111	707	2	Interstitial	H2-12	H2	High
14	413081	415691	2610	2	Interstitial	H2-12	H2	High
14	437537	438392	855	2	Interstitial	H2-12	H2	High
14	84304	85360	1056	3	Interstitial	H2-12	H2	High
14	419354	421191	1837	3	Interstitial	H2-12	H2	High
14	489039	494753	5714	3	Interstitial	H2-12	H2	High
14	333573	347066	13493	4	Interstitial	H2-12	H2	High
14	225882	229052	3170	5	Interstitial	H2-12	H2	High
14	745665	751606	5941	5	Interstitial	H2-12	H2	High
14	444176	451065	6889	7	Interstitial	H2-12	H2	High
14	20477	48437	27960	8	Interstitial	H2-12	H2	High
14	638826	706776	67950	19	Interstitial	H2-12	H2	High
15	759047	762476	3429	3	Interstitial	H2-12	H2	High
15	777411	779578	2167	3	Interstitial	H2-12	H2	High
15	74062	82006	7944	4	Interstitial	H2-12	H2	High
15	822163	828932	6769	4	Interstitial	H2-12	H2	High
15	749219	751779	2560	5	Interstitial	H2-12	H2	High
15	29397	35780	6383	6	Interstitial	H2-12	H2	High
15	83154	88563	5409	8	Interstitial	H2-12	H2	High
15	62068	65234	3166	12	Interstitial	H2-12	H2	High
15	68427	72118	3691	13	Interstitial	H2-12	H2	High
15	792074	809266	17192	15	Interstitial	H2-12	H2	High
15	148052	287805	139753	89	Interstitial	H2-12	H2	High
15	900219	1057312	157093	97	Interstitial	H2-12	H2	High
15	446033	662137	216104	108	Interstitial	H2-12	H2	High
16	455828	456130	302	2	Interstitial	H2-12	H2	High
16	542663	547966	5303	2	Interstitial	H2-12	H2	High
16	412095	416541	4446	3	Interstitial	H2-12	H2	High
16	399020	406676	7656	4	Interstitial	H2-12	H2	High
16	621047	623754	2707	4	Interstitial	H2-12	H2	High
16	774941	784552	9611	4	Interstitial	H2-12	H2	High
16	84073	87905	3832	6	Interstitial	H2-12	H2	High
16	800309	925051	124742	52	Interstitial	H2-12	H2	High
16	133099	331246	198147	189	Interstitial	H2-12	H2	High
4	14786	17198	2412	2	Terminal	H2-01	H2	High
8	6448	6481	33	5	Terminal	H2-01	H2	High
13	915802	916321	519	3	Terminal	H2-01	H2	High
3	16200	17491	1291	2	Terminal	H2-02	H2	High
3	315688	315697	9	2	Terminal	H2-02	H2	High
7	14357	19355	4998	2	Terminal	H2-02	H2	High
8	18298	21219	2921	4	Terminal	H2-02	H2	High
8	6448	6486	38	6	Terminal	H2-02	H2	High
2	11078	146242	135164	15	Terminal	H2-03	H2	High
3	315688	315697	9	2	Terminal	H2-03	H2	High
4	1481908	1521582	39674	4	Terminal	H2-03	H2	High
6	236004	260667	24663	8	Terminal	H2-03	H2	High
8	6995	9013	2018	2	Terminal	H2-03	H2	High
13	462676	918468	455792	66	Terminal	H2-03	H2	High
4	7094	118066	110972	43	Terminal	H2-04	H2	High
5	508742	565986	57244	134	Terminal	H2-04	H2	High
8	13763	15204	1441	4	Terminal	H2-04	H2	High
10	729821	744234	14413	4	Terminal	H2-04	H2	High
13	830731	918880	88149	29	Terminal	H2-04	H2	High
16	17549	375354	357805	194	Terminal	H2-04	H2	High
3	6127	6445	318	2	Terminal	H2-05	H2	High
3	16200	17491	1291	2	Terminal	H2-05	H2	High
6	15390	17611	2221	2	Terminal	H2-05	H2	High
7	7547	49862	42315	51	Terminal	H2-05	H2	High
8	6448	6461	13	4	Terminal	H2-05	H2	High
8	9013	15204	6191	7	Terminal	H2-05	H2	High
10	744240	744251	11	2	Terminal	H2-05	H2	High
13	904449	905546	1097	2	Terminal	H2-05	H2	High
13	14302	23161	8859	4	Terminal	H2-05	H2	High
13	916370	916849	479	6	Terminal	H2-05	H2	High
15	419191	1079353	660162	420	Terminal	H2-05	H2	High
16	16071	21190	5119	6	Terminal	H2-05	H2	High
2	11078	21624	10546	3	Terminal	H2-06	H2	High
3	315688	315697	9	2	Terminal	H2-06	H2	High
3	4925	5369	444	3	Terminal	H2-06	H2	High
4	19128	19544	416	2	Terminal	H2-07	H2	High
6	15390	17611	2221	2	Terminal	H2-07	H2	High
12	807294	1059292	251998	111	Terminal	H2-07	H2	High
13	914603	914751	148	4	Terminal	H2-07	H2	High
16	15520	16800	1280	3	Terminal	H2-07	H2	High
2	9932	802008	792076	145	Terminal	H2-08	H2	High
3	5464	117971	112507	115	Terminal	H2-08	H2	High
4	15044	600107	585063	148	Terminal	H2-08	H2	High
4	600555	1522717	922162	194	Terminal	H2-08	H2	High
5	15422	566388	550966	207	Terminal	H2-08	H2	High
6	32818	260667	227849	41	Terminal	H2-08	H2	High
7	2534	1073624	1071090	306	Terminal	H2-08	H2	High
8	7403	187224	179821	44	Terminal	H2-08	H2	High
9	34441	422867	388426	92	Terminal	H2-08	H2	High
10	29837	744241	714404	193	Terminal	H2-08	H2	High
11	14929	644505	629576	174	Terminal	H2-08	H2	High
12	26398	1059292	1032894	202	Terminal	H2-08	H2	High
13	19186	916622	897436	189	Terminal	H2-08	H2	High
14	260955	781551	520596	95	Terminal	H2-08	H2	High
16	338003	935799	597796	122	Terminal	H2-08	H2	High
16	12633	327000	314367	138	Terminal	H2-08	H2	High
6	19400	23616	4216	3	Terminal	H2-09	H2	High
8	7489	9538	2049	4	Terminal	H2-09	H2	High
13	914649	914751	102	2	Terminal	H2-09	H2	High
16	16120	21430	5310	3	Terminal	H2-09	H2	High
2	9932	16682	6750	2	Terminal	H2-10	H2	High
3	4925	5369	444	3	Terminal	H2-10	H2	High
13	579606	918346	338740	50	Terminal	H2-10	H2	High
16	12625	12678	53	5	Terminal	H2-10	H2	High
16	674467	928570	254103	20	Terminal	H2-10	H2	High
2	9932	33617	23685	10	Terminal	H2-11	H2	High
3	315688	315697	9	2	Terminal	H2-11	H2	High
3	4925	5722	797	3	Terminal	H2-11	H2	High
8	13926	15204	1278	3	Terminal	H2-11	H2	High
10	744240	744251	11	2	Terminal	H2-11	H2	High
13	915561	915749	188	2	Terminal	H2-11	H2	High
16	12625	495335	482710	197	Terminal	H2-11	H2	High
2	786641	801771	15130	14	Terminal	H2-12	H2	High
2	18526	160957	142431	66	Terminal	H2-12	H2	High
3	5258	6445	1187	5	Terminal	H2-12	H2	High
3	8452	17491	9039	9	Terminal	H2-12	H2	High
3	234859	315697	80838	34	Terminal	H2-12	H2	High
6	15390	17611	2221	2	Terminal	H2-12	H2	High
6	257354	269316	11962	6	Terminal	H2-12	H2	High
7	3026	49862	46836	46	Terminal	H2-12	H2	High
8	13763	15204	1441	4	Terminal	H2-12	H2	High
8	6448	6486	38	6	Terminal	H2-12	H2	High
9	409376	422960	13584	5	Terminal	H2-12	H2	High
10	744240	744251	11	2	Terminal	H2-12	H2	High
10	546169	727873	181704	114	Terminal	H2-12	H2	High
11	14929	44761	29832	33	Terminal	H2-12	H2	High
13	916370	916849	479	6	Terminal	H2-12	H2	High
16	16120	21190	5070	3	Terminal	H2-12	H2	High
3	205501	209277	3776	4	Interstitial	H3-01	H3	High
9	27530	27661	131	3	Interstitial	H3-01	H3	High
9	149272	149434	162	3	Interstitial	H3-01	H3	High
14	724735	724988	253	2	Interstitial	H3-01	H3	High
4	579424	580086	662	2	Interstitial	H3-02	H3	High
4	786234	786391	157	2	Interstitial	H3-02	H3	High
4	886748	889866	3118	2	Interstitial	H3-02	H3	High
4	1267849	1268187	338	2	Interstitial	H3-02	H3	High
4	681949	682762	813	3	Interstitial	H3-02	H3	High
4	1509977	1510068	91	3	Interstitial	H3-02	H3	High
5	25833	25927	94	2	Interstitial	H3-02	H3	High
9	260217	260349	132	2	Interstitial	H3-02	H3	High
9	148924	149240	316	6	Interstitial	H3-02	H3	High
13	50731	51073	342	6	Interstitial	H3-02	H3	High
14	738368	738713	345	2	Interstitial	H3-02	H3	High
1	186994	191420	4426	9	Interstitial	H3-03	H3	High
1	60675	111996	51321	46	Interstitial	H3-03	H3	High
2	775039	791383	16344	4	Interstitial	H3-03	H3	High
2	294391	484676	190285	91	Interstitial	H3-03	H3	High
2	489304	667544	178240	136	Interstitial	H3-03	H3	High
4	1474769	1478972	4203	2	Interstitial	H3-03	H3	High
4	1089621	1293603	203982	177	Interstitial	H3-03	H3	High
5	404229	411293	7064	2	Interstitial	H3-03	H3	High
5	287137	292496	5359	3	Interstitial	H3-03	H3	High
5	246765	249690	2925	7	Interstitial	H3-03	H3	High
5	27406	122594	95188	72	Interstitial	H3-03	H3	High
6	63792	68342	4550	13	Interstitial	H3-03	H3	High
7	51393	93971	42578	33	Interstitial	H3-03	H3	High
7	914224	995503	81279	57	Interstitial	H3-03	H3	High
7	681051	800187	119136	101	Interstitial	H3-03	H3	High
8	229348	451386	222038	222	Interstitial	H3-03	H3	High
9	32456	34059	1603	3	Interstitial	H3-03	H3	High
9	40966	91107	50141	14	Interstitial	H3-03	H3	High
10	676068	714028	37960	62	Interstitial	H3-03	H3	High
12	65522	66857	1335	2	Interstitial	H3-03	H3	High
12	807562	808407	845	2	Interstitial	H3-03	H3	High
12	999487	1002293	2806	4	Interstitial	H3-03	H3	High
12	519276	603693	84417	79	Interstitial	H3-03	H3	High
12	253852	425752	171900	178	Interstitial	H3-03	H3	High
13	418380	423104	4724	12	Interstitial	H3-03	H3	High
13	557540	718850	161310	69	Interstitial	H3-03	H3	High
14	737416	741306	3890	10	Interstitial	H3-03	H3	High
14	85420	489888	404468	300	Interstitial	H3-03	H3	High
15	22964	140048	117084	80	Interstitial	H3-03	H3	High
15	764877	1066633	301756	311	Interstitial	H3-03	H3	High
16	887497	890290	2793	2	Interstitial	H3-03	H3	High
16	897193	900702	3509	7	Interstitial	H3-03	H3	High
16	394879	526705	131826	64	Interstitial	H3-03	H3	High
16	22486	382780	360294	272	Interstitial	H3-03	H3	High
1	194137	203071	8934	4	Interstitial	H3-04	H3	High
4	1053487	1054085	598	3	Interstitial	H3-04	H3	High
4	1288962	1408941	119979	65	Interstitial	H3-04	H3	High
5	375455	521276	145821	10	Interstitial	H3-04	H3	High
7	675204	959285	284081	104	Interstitial	H3-04	H3	High
10	328488	338645	10157	4	Interstitial	H3-04	H3	High
11	80226	82427	2201	2	Interstitial	H3-04	H3	High
11	210622	215996	5374	2	Interstitial	H3-04	H3	High
12	177890	179088	1198	2	Interstitial	H3-04	H3	High
12	288229	288482	253	2	Interstitial	H3-04	H3	High
12	856182	875916	19734	21	Interstitial	H3-04	H3	High
12	779472	854929	75457	54	Interstitial	H3-04	H3	High
12	609036	776022	166986	79	Interstitial	H3-04	H3	High
12	878834	1003060	124226	89	Interstitial	H3-04	H3	High
13	23615	25898	2283	3	Interstitial	H3-04	H3	High
14	647077	650950	3873	2	Interstitial	H3-04	H3	High
15	142291	144519	2228	3	Interstitial	H3-04	H3	High
15	215774	216618	844	3	Interstitial	H3-04	H3	High
15	749649	880601	130952	97	Interstitial	H3-04	H3	High
5	61439	67035	5596	7	Interstitial	H3-05	H3	High
6	92628	103275	10647	16	Interstitial	H3-05	H3	High
7	99299	100204	905	2	Interstitial	H3-05	H3	High
7	539480	547733	8253	2	Interstitial	H3-05	H3	High
7	811099	811214	115	2	Interstitial	H3-05	H3	High
9	27709	27793	84	2	Interstitial	H3-05	H3	High
9	386863	386983	120	2	Interstitial	H3-05	H3	High
9	316322	316642	320	6	Interstitial	H3-05	H3	High
10	32744	360327	327583	64	Interstitial	H3-05	H3	High
13	308419	311742	3323	10	Interstitial	H3-05	H3	High
14	347669	351229	3560	2	Interstitial	H3-05	H3	High
14	571212	572828	1616	2	Interstitial	H3-05	H3	High
14	711827	714769	2942	2	Interstitial	H3-05	H3	High
16	22128	379399	357271	252	Interstitial	H3-05	H3	High
2	408726	412278	3552	2	Interstitial	H3-06	H3	High
3	182982	183072	90	3	Interstitial	H3-06	H3	High
4	271069	285090	14021	14	Interstitial	H3-06	H3	High
4	52442	62114	9672	15	Interstitial	H3-06	H3	High
6	92229	94963	2734	2	Interstitial	H3-06	H3	High
7	405489	453717	48228	23	Interstitial	H3-06	H3	High
9	183578	311458	127880	131	Interstitial	H3-06	H3	High
9	26422	183443	157021	165	Interstitial	H3-06	H3	High
11	33918	34068	150	2	Interstitial	H3-06	H3	High
11	295178	296159	981	3	Interstitial	H3-06	H3	High
12	266516	269327	2811	2	Interstitial	H3-06	H3	High
12	331551	332587	1036	3	Interstitial	H3-06	H3	High
12	722457	722649	192	3	Interstitial	H3-06	H3	High
14	42704	44149	1445	2	Interstitial	H3-06	H3	High
15	31125	313942	282817	142	Interstitial	H3-06	H3	High
2	746302	746498	196	2	Interstitial	H3-07	H3	High
2	768260	770073	1813	2	Interstitial	H3-07	H3	High
3	183109	183440	331	3	Interstitial	H3-07	H3	High
4	618477	621602	3125	2	Interstitial	H3-07	H3	High
8	399042	399108	66	5	Interstitial	H3-07	H3	High
9	174606	174723	117	2	Interstitial	H3-07	H3	High
9	388241	388312	71	2	Interstitial	H3-07	H3	High
11	178800	179244	444	2	Interstitial	H3-07	H3	High
12	563194	563249	55	2	Interstitial	H3-07	H3	High
12	657349	658315	966	2	Interstitial	H3-07	H3	High
12	760625	762511	1886	2	Interstitial	H3-07	H3	High
12	794975	796210	1235	2	Interstitial	H3-07	H3	High
12	881760	883741	1981	2	Interstitial	H3-07	H3	High
12	796774	797667	893	3	Interstitial	H3-07	H3	High
12	888990	890870	1880	3	Interstitial	H3-07	H3	High
12	893672	894818	1146	3	Interstitial	H3-07	H3	High
12	924862	927685	2823	3	Interstitial	H3-07	H3	High
12	930785	932162	1377	3	Interstitial	H3-07	H3	High
12	949008	949205	197	3	Interstitial	H3-07	H3	High
12	1041298	1050101	8803	3	Interstitial	H3-07	H3	High
12	855334	855745	411	4	Interstitial	H3-07	H3	High
12	874139	879512	5373	4	Interstitial	H3-07	H3	High
12	966950	967810	860	4	Interstitial	H3-07	H3	High
12	829245	839854	10609	5	Interstitial	H3-07	H3	High
12	868900	872428	3528	5	Interstitial	H3-07	H3	High
12	886205	888523	2318	5	Interstitial	H3-07	H3	High
12	932736	933465	729	5	Interstitial	H3-07	H3	High
12	799831	805320	5489	6	Interstitial	H3-07	H3	High
12	896290	912299	16009	6	Interstitial	H3-07	H3	High
12	964535	966208	1673	6	Interstitial	H3-07	H3	High
12	856332	859864	3532	7	Interstitial	H3-07	H3	High
12	968503	974874	6371	7	Interstitial	H3-07	H3	High
12	913757	921024	7267	9	Interstitial	H3-07	H3	High
12	809037	812396	3359	10	Interstitial	H3-07	H3	High
12	935114	947586	12472	10	Interstitial	H3-07	H3	High
12	978923	984288	5365	11	Interstitial	H3-07	H3	High
12	1006235	1030800	24565	11	Interstitial	H3-07	H3	High
12	788645	793248	4603	12	Interstitial	H3-07	H3	High
12	849514	855122	5608	12	Interstitial	H3-07	H3	High
12	955188	962352	7164	13	Interstitial	H3-07	H3	High
12	784108	788387	4279	14	Interstitial	H3-07	H3	High
12	987073	995407	8334	14	Interstitial	H3-07	H3	High
12	763711	783440	19729	28	Interstitial	H3-07	H3	High
12	660077	744942	84865	53	Interstitial	H3-07	H3	High
13	31356	34707	3351	3	Interstitial	H3-07	H3	High
13	47041	48926	1885	5	Interstitial	H3-07	H3	High
15	733758	735600	1842	2	Interstitial	H3-07	H3	High
1	36605	197789	161184	84	Interstitial	H3-08	H3	High
2	628640	734491	105851	48	Interstitial	H3-08	H3	High
2	513128	624585	111457	52	Interstitial	H3-08	H3	High
4	1272371	1406829	134458	79	Interstitial	H3-08	H3	High
4	21119	1267382	1246263	792	Interstitial	H3-08	H3	High
8	36833	82284	45451	20	Interstitial	H3-08	H3	High
8	498920	539159	40239	36	Interstitial	H3-08	H3	High
8	83999	497012	413013	261	Interstitial	H3-08	H3	High
9	131285	135898	4613	2	Interstitial	H3-08	H3	High
9	302713	302785	72	2	Interstitial	H3-08	H3	High
12	687944	887747	199803	166	Interstitial	H3-08	H3	High
14	755612	758461	2849	6	Interstitial	H3-08	H3	High
14	365518	754487	388969	251	Interstitial	H3-08	H3	High
15	60981	673574	612593	276	Interstitial	H3-08	H3	High
15	673902	1066053	392151	279	Interstitial	H3-08	H3	High
4	21906	290002	268096	104	Interstitial	H3-09	H3	High
7	850718	851003	285	2	Interstitial	H3-09	H3	High
7	248106	249636	1530	3	Interstitial	H3-09	H3	High
7	469746	473207	3461	6	Interstitial	H3-09	H3	High
8	489532	492457	2925	2	Interstitial	H3-09	H3	High
8	319475	321985	2510	5	Interstitial	H3-09	H3	High
9	27623	27766	143	2	Interstitial	H3-09	H3	High
9	297353	297604	251	2	Interstitial	H3-09	H3	High
9	336798	337246	448	2	Interstitial	H3-09	H3	High
9	27941	27992	51	3	Interstitial	H3-09	H3	High
9	302897	306430	3533	3	Interstitial	H3-09	H3	High
9	48691	252884	204193	138	Interstitial	H3-09	H3	High
10	662662	665022	2360	2	Interstitial	H3-09	H3	High
11	561628	573762	12134	9	Interstitial	H3-09	H3	High
13	22323	24399	2076	2	Interstitial	H3-09	H3	High
13	245316	245584	268	2	Interstitial	H3-09	H3	High
13	491413	496774	5361	2	Interstitial	H3-09	H3	High
13	78874	99362	20488	6	Interstitial	H3-09	H3	High
14	380458	382547	2089	2	Interstitial	H3-09	H3	High
15	103044	105571	2527	2	Interstitial	H3-09	H3	High
15	281715	281840	125	2	Interstitial	H3-09	H3	High
1	190587	208588	18001	7	Interstitial	H3-10	H3	High
2	650273	651496	1223	2	Interstitial	H3-10	H3	High
3	72395	79432	7037	6	Interstitial	H3-10	H3	High
5	261803	262444	641	3	Interstitial	H3-10	H3	High
6	93985	99968	5983	17	Interstitial	H3-10	H3	High
7	772554	775584	3030	5	Interstitial	H3-10	H3	High
7	785672	798773	13101	23	Interstitial	H3-10	H3	High
9	260093	260186	93	2	Interstitial	H3-10	H3	High
9	262985	263132	147	2	Interstitial	H3-10	H3	High
9	310739	310946	207	2	Interstitial	H3-10	H3	High
9	389121	389678	557	4	Interstitial	H3-10	H3	High
11	80248	81110	862	5	Interstitial	H3-10	H3	High
11	193680	197350	3670	5	Interstitial	H3-10	H3	High
13	32250	34930	2680	2	Interstitial	H3-10	H3	High
13	227207	232290	5083	7	Interstitial	H3-10	H3	High
14	465477	466994	1517	2	Interstitial	H3-10	H3	High
15	22760	117622	94862	60	Interstitial	H3-10	H3	High
1	168318	170041	1723	2	Interstitial	H3-11	H3	High
1	175754	177486	1732	3	Interstitial	H3-11	H3	High
2	623677	623899	222	3	Interstitial	H3-11	H3	High
4	773911	774253	342	2	Interstitial	H3-11	H3	High
4	1510022	1510145	123	3	Interstitial	H3-11	H3	High
5	46081	46245	164	2	Interstitial	H3-11	H3	High
6	112963	113190	227	2	Interstitial	H3-11	H3	High
8	292237	292669	432	2	Interstitial	H3-11	H3	High
8	501499	501842	343	2	Interstitial	H3-11	H3	High
12	35070	35402	332	2	Interstitial	H3-11	H3	High
12	435668	435748	80	2	Interstitial	H3-11	H3	High
12	694900	695305	405	2	Interstitial	H3-11	H3	High
13	54209	54666	457	2	Interstitial	H3-11	H3	High
1	80470	88099	7629	7	Interstitial	H3-12	H3	High
2	322779	364824	42045	30	Interstitial	H3-12	H3	High
2	527649	658203	130554	218	Interstitial	H3-12	H3	High
4	634581	636159	1578	3	Interstitial	H3-12	H3	High
4	277637	278974	1337	6	Interstitial	H3-12	H3	High
4	355660	398518	42858	36	Interstitial	H3-12	H3	High
4	90857	173506	82649	94	Interstitial	H3-12	H3	High
4	867206	936380	69174	132	Interstitial	H3-12	H3	High
4	1275909	1421007	145098	220	Interstitial	H3-12	H3	High
5	323163	376765	53602	68	Interstitial	H3-12	H3	High
5	43600	67953	24353	70	Interstitial	H3-12	H3	High
6	182067	183683	1616	2	Interstitial	H3-12	H3	High
7	360885	415522	54637	43	Interstitial	H3-12	H3	High
7	72337	99908	27571	70	Interstitial	H3-12	H3	High
7	100102	291066	190964	248	Interstitial	H3-12	H3	High
7	540724	955434	414710	544	Interstitial	H3-12	H3	High
8	469152	469444	292	2	Interstitial	H3-12	H3	High
8	361344	461832	100488	147	Interstitial	H3-12	H3	High
8	218244	360976	142732	288	Interstitial	H3-12	H3	High
9	35716	35836	120	2	Interstitial	H3-12	H3	High
9	314012	314380	368	2	Interstitial	H3-12	H3	High
9	316310	316400	90	2	Interstitial	H3-12	H3	High
10	235723	311677	75954	24	Interstitial	H3-12	H3	High
11	74588	220156	145568	138	Interstitial	H3-12	H3	High
12	129568	129675	107	2	Interstitial	H3-12	H3	High
12	52923	55655	2732	4	Interstitial	H3-12	H3	High
12	343258	455483	112225	189	Interstitial	H3-12	H3	High
12	475502	720474	244972	362	Interstitial	H3-12	H3	High
13	309678	309843	165	2	Interstitial	H3-12	H3	High
13	778620	780368	1748	2	Interstitial	H3-12	H3	High
13	700215	702160	1945	3	Interstitial	H3-12	H3	High
13	42648	259964	217316	421	Interstitial	H3-12	H3	High
14	418713	418771	58	3	Interstitial	H3-12	H3	High
14	64982	183975	118993	71	Interstitial	H3-12	H3	High
15	297982	298340	358	2	Interstitial	H3-12	H3	High
15	54908	63386	8478	33	Interstitial	H3-12	H3	High
15	681941	704903	22962	36	Interstitial	H3-12	H3	High
15	171370	227581	56211	61	Interstitial	H3-12	H3	High
15	67071	105488	38417	71	Interstitial	H3-12	H3	High
15	520913	586398	65485	103	Interstitial	H3-12	H3	High
15	764877	984031	219154	474	Interstitial	H3-12	H3	High
16	380285	382923	2638	5	Interstitial	H3-12	H3	High
16	898427	900875	2448	8	Interstitial	H3-12	H3	High
16	85422	89563	4141	9	Interstitial	H3-12	H3	High
1	34711	197419	162708	85	Interstitial	H3-13	H3	High
10	37988	365944	327956	73	Interstitial	H3-13	H3	High
12	610855	788983	178128	148	Interstitial	H3-13	H3	High
12	20070	610743	590673	484	Interstitial	H3-13	H3	High
15	22964	100047	77083	50	Interstitial	H3-13	H3	High
2	757329	757778	449	3	Interstitial	H3-14	H3	High
2	623677	626345	2668	11	Interstitial	H3-14	H3	High
4	1112787	1122316	9529	9	Interstitial	H3-14	H3	High
4	355710	359753	4043	10	Interstitial	H3-14	H3	High
5	25833	25927	94	2	Interstitial	H3-14	H3	High
7	1063447	1063566	119	2	Interstitial	H3-14	H3	High
9	369010	369108	98	2	Interstitial	H3-14	H3	High
14	21835	22753	918	2	Interstitial	H3-14	H3	High
14	433219	433326	107	2	Interstitial	H3-14	H3	High
3	204369	205534	1165	5	Interstitial	H3-15	H3	High
4	100696	101814	1118	2	Interstitial	H3-15	H3	High
4	104899	106169	1270	2	Interstitial	H3-15	H3	High
4	158715	159751	1036	2	Interstitial	H3-15	H3	High
4	230936	235720	4784	2	Interstitial	H3-15	H3	High
4	270895	271690	795	2	Interstitial	H3-15	H3	High
4	274740	275605	865	2	Interstitial	H3-15	H3	High
4	294619	299928	5309	2	Interstitial	H3-15	H3	High
4	359753	360668	915	2	Interstitial	H3-15	H3	High
4	576196	576317	121	2	Interstitial	H3-15	H3	High
4	785387	785672	285	2	Interstitial	H3-15	H3	High
4	1424592	1424702	110	2	Interstitial	H3-15	H3	High
4	21233	21792	559	3	Interstitial	H3-15	H3	High
4	107757	126678	18921	3	Interstitial	H3-15	H3	High
4	59137	67315	8178	4	Interstitial	H3-15	H3	High
4	92619	96830	4211	4	Interstitial	H3-15	H3	High
4	163885	164347	462	4	Interstitial	H3-15	H3	High
4	49342	50260	918	5	Interstitial	H3-15	H3	High
4	276789	283737	6948	12	Interstitial	H3-15	H3	High
5	138187	138642	455	2	Interstitial	H3-15	H3	High
5	245051	245942	891	2	Interstitial	H3-15	H3	High
5	59459	59582	123	3	Interstitial	H3-15	H3	High
5	242243	243151	908	4	Interstitial	H3-15	H3	High
7	432698	433023	325	2	Interstitial	H3-15	H3	High
7	1047185	1047498	313	2	Interstitial	H3-15	H3	High
8	100438	101140	702	2	Interstitial	H3-15	H3	High
8	361733	361994	261	2	Interstitial	H3-15	H3	High
8	179175	179348	173	3	Interstitial	H3-15	H3	High
8	365836	365972	136	3	Interstitial	H3-15	H3	High
8	500995	501607	612	3	Interstitial	H3-15	H3	High
8	514891	515324	433	3	Interstitial	H3-15	H3	High
8	505600	507175	1575	4	Interstitial	H3-15	H3	High
8	516993	519845	2852	4	Interstitial	H3-15	H3	High
8	495299	496450	1151	5	Interstitial	H3-15	H3	High
8	502536	504677	2141	5	Interstitial	H3-15	H3	High
8	496692	500500	3808	7	Interstitial	H3-15	H3	High
8	468879	473167	4288	9	Interstitial	H3-15	H3	High
8	424676	459423	34747	11	Interstitial	H3-15	H3	High
8	510844	514484	3640	11	Interstitial	H3-15	H3	High
8	476753	491335	14582	19	Interstitial	H3-15	H3	High
9	148479	148896	417	2	Interstitial	H3-15	H3	High
9	263652	263813	161	2	Interstitial	H3-15	H3	High
9	319421	321067	1646	2	Interstitial	H3-15	H3	High
9	357673	358324	651	2	Interstitial	H3-15	H3	High
9	28937	29056	119	3	Interstitial	H3-15	H3	High
9	364175	364931	756	3	Interstitial	H3-15	H3	High
9	27530	27709	179	4	Interstitial	H3-15	H3	High
10	572091	572293	202	2	Interstitial	H3-15	H3	High
11	470159	471140	981	4	Interstitial	H3-15	H3	High
11	465531	469336	3805	6	Interstitial	H3-15	H3	High
11	475443	500762	25319	7	Interstitial	H3-15	H3	High
12	562924	563255	331	2	Interstitial	H3-15	H3	High
13	326636	326793	157	2	Interstitial	H3-15	H3	High
14	20356	20879	523	2	Interstitial	H3-15	H3	High
14	73440	73573	133	2	Interstitial	H3-15	H3	High
14	277689	278040	351	2	Interstitial	H3-15	H3	High
14	49005	49584	579	3	Interstitial	H3-15	H3	High
14	307662	318432	10770	3	Interstitial	H3-15	H3	High
14	51189	51946	757	4	Interstitial	H3-15	H3	High
14	55920	64034	8114	4	Interstitial	H3-15	H3	High
14	103530	105328	1798	4	Interstitial	H3-15	H3	High
14	194622	195160	538	4	Interstitial	H3-15	H3	High
14	279217	280187	970	4	Interstitial	H3-15	H3	High
14	343299	355478	12179	4	Interstitial	H3-15	H3	High
14	37434	42036	4602	5	Interstitial	H3-15	H3	High
14	196061	205803	9742	5	Interstitial	H3-15	H3	High
14	226319	231357	5038	5	Interstitial	H3-15	H3	High
14	21490	34300	12810	6	Interstitial	H3-15	H3	High
14	335100	336834	1734	6	Interstitial	H3-15	H3	High
14	287439	289171	1732	8	Interstitial	H3-15	H3	High
14	45331	48411	3080	18	Interstitial	H3-15	H3	High
15	1041067	1043442	2375	2	Interstitial	H3-15	H3	High
15	1044872	1048322	3450	3	Interstitial	H3-15	H3	High
16	73118	73881	763	2	Interstitial	H3-15	H3	High
16	74822	75349	527	2	Interstitial	H3-15	H3	High
16	111000	111657	657	2	Interstitial	H3-15	H3	High
16	112364	114025	1661	2	Interstitial	H3-15	H3	High
16	142177	142865	688	2	Interstitial	H3-15	H3	High
16	144594	145343	749	2	Interstitial	H3-15	H3	High
16	375991	376374	383	2	Interstitial	H3-15	H3	High
16	496764	497117	353	2	Interstitial	H3-15	H3	High
16	80011	81576	1565	3	Interstitial	H3-15	H3	High
16	88777	89589	812	3	Interstitial	H3-15	H3	High
16	138769	141925	3156	3	Interstitial	H3-15	H3	High
16	178961	180056	1095	3	Interstitial	H3-15	H3	High
16	190645	191640	995	3	Interstitial	H3-15	H3	High
16	330131	358360	28229	3	Interstitial	H3-15	H3	High
16	52533	53186	653	4	Interstitial	H3-15	H3	High
16	67959	68803	844	4	Interstitial	H3-15	H3	High
16	194648	196364	1716	4	Interstitial	H3-15	H3	High
16	216864	228097	11233	5	Interstitial	H3-15	H3	High
16	22128	50925	28797	6	Interstitial	H3-15	H3	High
16	180278	181772	1494	6	Interstitial	H3-15	H3	High
16	155578	162970	7392	8	Interstitial	H3-15	H3	High
16	63482	64773	1291	17	Interstitial	H3-15	H3	High
2	291057	292931	1874	2	Interstitial	H3-16	H3	High
2	296885	384777	87892	45	Interstitial	H3-16	H3	High
2	384944	640546	255602	231	Interstitial	H3-16	H3	High
3	147610	147965	355	2	Interstitial	H3-16	H3	High
4	786706	786964	258	2	Interstitial	H3-16	H3	High
4	1052311	1056221	3910	12	Interstitial	H3-16	H3	High
4	1495949	1505323	9374	32	Interstitial	H3-16	H3	High
7	989405	989785	380	3	Interstitial	H3-16	H3	High
7	652413	678928	26515	28	Interstitial	H3-16	H3	High
9	255293	257156	1863	2	Interstitial	H3-16	H3	High
9	386783	386854	71	2	Interstitial	H3-16	H3	High
9	406699	406852	153	2	Interstitial	H3-16	H3	High
9	151549	151793	244	3	Interstitial	H3-16	H3	High
9	173803	173924	121	3	Interstitial	H3-16	H3	High
11	617702	618069	367	2	Interstitial	H3-16	H3	High
12	538191	538377	186	2	Interstitial	H3-16	H3	High
12	764508	764594	86	2	Interstitial	H3-16	H3	High
12	849018	849295	277	2	Interstitial	H3-16	H3	High
12	855334	855606	272	2	Interstitial	H3-16	H3	High
12	859236	860035	799	2	Interstitial	H3-16	H3	High
12	968194	968405	211	2	Interstitial	H3-16	H3	High
12	971476	971811	335	3	Interstitial	H3-16	H3	High
12	1031799	1035592	3793	3	Interstitial	H3-16	H3	High
12	947846	948291	445	4	Interstitial	H3-16	H3	High
13	331980	332318	338	3	Interstitial	H3-16	H3	High
14	473192	473277	85	2	Interstitial	H3-16	H3	High
15	1044767	1067238	22471	7	Interstitial	H3-16	H3	High
15	487165	550438	63273	41	Interstitial	H3-16	H3	High
15	1001466	1044008	42542	56	Interstitial	H3-16	H3	High
15	551362	751096	199734	129	Interstitial	H3-16	H3	High
15	753446	1000652	247206	349	Interstitial	H3-16	H3	High
16	33864	433759	399895	406	Interstitial	H3-16	H3	High
1	58850	61739	2889	3	Interstitial	H3-17	H3	High
1	190407	203071	12664	12	Interstitial	H3-17	H3	High
2	181468	181675	207	2	Interstitial	H3-17	H3	High
2	332993	333104	111	2	Interstitial	H3-17	H3	High
2	160691	169749	9058	3	Interstitial	H3-17	H3	High
2	451500	456718	5218	4	Interstitial	H3-17	H3	High
2	716408	719186	2778	4	Interstitial	H3-17	H3	High
2	650195	652533	2338	7	Interstitial	H3-17	H3	High
4	703981	707805	3824	3	Interstitial	H3-17	H3	High
4	1140690	1140915	225	3	Interstitial	H3-17	H3	High
4	559152	564920	5768	4	Interstitial	H3-17	H3	High
4	1340592	1400962	60370	71	Interstitial	H3-17	H3	High
5	159149	163892	4743	9	Interstitial	H3-17	H3	High
5	27678	141864	114186	118	Interstitial	H3-17	H3	High
6	32084	76967	44883	44	Interstitial	H3-17	H3	High
7	621585	621688	103	2	Interstitial	H3-17	H3	High
7	223412	226338	2926	3	Interstitial	H3-17	H3	High
7	721540	900602	179062	154	Interstitial	H3-17	H3	High
8	424107	424654	547	2	Interstitial	H3-17	H3	High
8	501802	503584	1782	4	Interstitial	H3-17	H3	High
9	27474	27623	149	2	Interstitial	H3-17	H3	High
9	184882	185069	187	2	Interstitial	H3-17	H3	High
9	297409	297770	361	2	Interstitial	H3-17	H3	High
9	408007	408135	128	2	Interstitial	H3-17	H3	High
9	117460	177342	59882	87	Interstitial	H3-17	H3	High
10	296390	296720	330	2	Interstitial	H3-17	H3	High
10	243297	287425	44128	5	Interstitial	H3-17	H3	High
10	388847	391827	2980	9	Interstitial	H3-17	H3	High
10	576763	621882	45119	15	Interstitial	H3-17	H3	High
10	127983	238293	110310	25	Interstitial	H3-17	H3	High
11	487359	554056	66697	8	Interstitial	H3-17	H3	High
11	37264	67142	29878	34	Interstitial	H3-17	H3	High
11	241934	400060	158126	69	Interstitial	H3-17	H3	High
12	196445	198524	2079	2	Interstitial	H3-17	H3	High
12	738514	741576	3062	2	Interstitial	H3-17	H3	High
12	325950	328766	2816	5	Interstitial	H3-17	H3	High
12	598165	605511	7346	5	Interstitial	H3-17	H3	High
12	338404	344662	6258	14	Interstitial	H3-17	H3	High
12	31312	101246	69934	36	Interstitial	H3-17	H3	High
12	757799	869302	111503	203	Interstitial	H3-17	H3	High
13	861688	873000	11312	2	Interstitial	H3-17	H3	High
13	714121	716247	2126	3	Interstitial	H3-17	H3	High
13	886250	894981	8731	3	Interstitial	H3-17	H3	High
13	331981	332188	207	4	Interstitial	H3-17	H3	High
13	829384	838735	9351	11	Interstitial	H3-17	H3	High
13	556810	656993	100183	33	Interstitial	H3-17	H3	High
13	396349	510974	114625	105	Interstitial	H3-17	H3	High
13	42648	170344	127696	127	Interstitial	H3-17	H3	High
14	599526	601260	1734	2	Interstitial	H3-17	H3	High
14	184133	484648	300515	331	Interstitial	H3-17	H3	High
15	22760	202113	179353	133	Interstitial	H3-17	H3	High
15	424128	986944	562816	470	Interstitial	H3-17	H3	High
16	170500	170979	479	2	Interstitial	H3-17	H3	High
16	706966	717180	10214	14	Interstitial	H3-17	H3	High
16	299614	428584	128970	37	Interstitial	H3-17	H3	High
16	762491	890290	127799	40	Interstitial	H3-17	H3	High
16	34211	134678	100467	152	Interstitial	H3-17	H3	High
1	112843	115302	2459	2	Interstitial	H3-18	H3	High
1	30654	64230	33576	23	Interstitial	H3-18	H3	High
2	391649	397725	6076	2	Interstitial	H3-18	H3	High
2	634860	696936	62076	62	Interstitial	H3-18	H3	High
4	1422253	1466401	44148	36	Interstitial	H3-18	H3	High
4	548599	641546	92947	63	Interstitial	H3-18	H3	High
4	1240406	1336963	96557	76	Interstitial	H3-18	H3	High
5	187599	187761	162	4	Interstitial	H3-18	H3	High
6	28364	98398	70034	56	Interstitial	H3-18	H3	High
7	472168	477040	4872	7	Interstitial	H3-18	H3	High
7	848819	851964	3145	9	Interstitial	H3-18	H3	High
7	852534	895910	43376	20	Interstitial	H3-18	H3	High
7	405489	424855	19366	23	Interstitial	H3-18	H3	High
7	1011013	1025035	14022	40	Interstitial	H3-18	H3	High
8	194189	194453	264	2	Interstitial	H3-18	H3	High
8	389598	390442	844	2	Interstitial	H3-18	H3	High
8	487503	539159	51656	54	Interstitial	H3-18	H3	High
8	203867	347440	143573	142	Interstitial	H3-18	H3	High
9	75265	75515	250	2	Interstitial	H3-18	H3	High
9	347227	350331	3104	2	Interstitial	H3-18	H3	High
9	381543	381974	431	2	Interstitial	H3-18	H3	High
9	406140	406297	157	2	Interstitial	H3-18	H3	High
9	394156	399437	5281	8	Interstitial	H3-18	H3	High
9	210820	317185	106365	219	Interstitial	H3-18	H3	High
10	155584	163363	7779	2	Interstitial	H3-18	H3	High
10	67613	127856	60243	15	Interstitial	H3-18	H3	High
10	488984	662771	173787	42	Interstitial	H3-18	H3	High
11	83049	160014	76965	35	Interstitial	H3-18	H3	High
11	173540	258566	85026	38	Interstitial	H3-18	H3	High
12	252152	254958	2806	2	Interstitial	H3-18	H3	High
12	341354	342175	821	2	Interstitial	H3-18	H3	High
12	247463	249987	2524	5	Interstitial	H3-18	H3	High
12	871934	955976	84042	110	Interstitial	H3-18	H3	High
12	757900	822638	64738	111	Interstitial	H3-18	H3	High
12	388050	518828	130778	147	Interstitial	H3-18	H3	High
13	623342	653920	30578	5	Interstitial	H3-18	H3	High
13	49842	74650	24808	51	Interstitial	H3-18	H3	High
14	642217	754487	112270	59	Interstitial	H3-18	H3	High
14	433665	480461	46796	76	Interstitial	H3-18	H3	High
14	23078	113851	90773	96	Interstitial	H3-18	H3	High
14	302379	433326	130947	167	Interstitial	H3-18	H3	High
15	926104	961285	35181	22	Interstitial	H3-18	H3	High
15	458702	612318	153616	123	Interstitial	H3-18	H3	High
16	266799	279893	13094	8	Interstitial	H3-18	H3	High
16	604149	637975	33826	65	Interstitial	H3-18	H3	High
16	32233	72217	39984	70	Interstitial	H3-18	H3	High
16	638436	777832	139396	151	Interstitial	H3-18	H3	High
16	76076	228097	152021	225	Interstitial	H3-18	H3	High
4	1056221	1056645	424	2	Interstitial	H3-19	H3	High
4	1352134	1352356	222	2	Interstitial	H3-19	H3	High
9	262817	262945	128	2	Interstitial	H3-19	H3	High
9	313550	314380	830	2	Interstitial	H3-19	H3	High
9	387305	387444	139	2	Interstitial	H3-19	H3	High
9	260093	260194	101	3	Interstitial	H3-19	H3	High
9	149262	149434	172	4	Interstitial	H3-19	H3	High
12	52729	52923	194	2	Interstitial	H3-19	H3	High
12	537782	538191	409	2	Interstitial	H3-19	H3	High
12	722613	722697	84	2	Interstitial	H3-19	H3	High
12	792402	792651	249	3	Interstitial	H3-19	H3	High
15	679009	680351	1342	3	Interstitial	H3-19	H3	High
4	737794	738024	230	2	Interstitial	H3-20	H3	High
4	363782	367855	4073	4	Interstitial	H3-20	H3	High
4	21108	309513	288405	83	Interstitial	H3-20	H3	High
4	893187	1366423	473236	261	Interstitial	H3-20	H3	High
5	70250	72699	2449	6	Interstitial	H3-20	H3	High
6	74676	74850	174	2	Interstitial	H3-20	H3	High
7	616175	619515	3340	9	Interstitial	H3-20	H3	High
7	621428	969198	347770	153	Interstitial	H3-20	H3	High
8	490249	491020	771	2	Interstitial	H3-20	H3	High
8	133500	421665	288165	151	Interstitial	H3-20	H3	High
9	336202	336345	143	2	Interstitial	H3-20	H3	High
9	406090	406297	207	2	Interstitial	H3-20	H3	High
9	298121	298199	78	3	Interstitial	H3-20	H3	High
11	194996	197350	2354	2	Interstitial	H3-20	H3	High
11	476735	479221	2486	2	Interstitial	H3-20	H3	High
11	571291	571355	64	2	Interstitial	H3-20	H3	High
11	611661	615685	4024	3	Interstitial	H3-20	H3	High
12	102665	109584	6919	2	Interstitial	H3-20	H3	High
12	790764	869087	78323	69	Interstitial	H3-20	H3	High
12	575217	789059	213842	91	Interstitial	H3-20	H3	High
13	309818	316136	6318	5	Interstitial	H3-20	H3	High
13	243137	248464	5327	6	Interstitial	H3-20	H3	High
13	352907	363259	10352	9	Interstitial	H3-20	H3	High
13	673590	771913	98323	59	Interstitial	H3-20	H3	High
15	821640	1066444	244804	156	Interstitial	H3-20	H3	High
16	118128	118664	536	2	Interstitial	H3-20	H3	High
16	680422	886635	206213	78	Interstitial	H3-20	H3	High
3	305957	308328	2371	3	Terminal	H3-01	H3	High
9	421486	424300	2814	2	Terminal	H3-01	H3	High
9	426919	427385	466	2	Terminal	H3-01	H3	High
11	2867	220156	217289	180	Terminal	H3-01	H3	High
12	244753	1059171	814418	736	Terminal	H3-01	H3	High
5	7205	9698	2493	6	Terminal	H3-02	H3	High
7	1083051	1083148	97	2	Terminal	H3-02	H3	High
9	427423	427915	492	2	Terminal	H3-02	H3	High
9	426747	426940	193	4	Terminal	H3-02	H3	High
13	497475	912105	414630	116	Terminal	H3-02	H3	High
2	12348	71922	59574	12	Terminal	H3-03	H3	High
3	11268	48937	37669	37	Terminal	H3-03	H3	High
4	1489196	1523727	34531	148	Terminal	H3-03	H3	High
4	11723	410494	398771	190	Terminal	H3-03	H3	High
5	525373	563461	38088	7	Terminal	H3-03	H3	High
6	182067	253828	71761	42	Terminal	H3-03	H3	High
7	3978	9108	5130	18	Terminal	H3-03	H3	High
7	1001529	1083187	81658	109	Terminal	H3-03	H3	High
9	389678	437475	47797	237	Terminal	H3-03	H3	High
10	727486	736034	8548	18	Terminal	H3-03	H3	High
10	714430	727163	12733	35	Terminal	H3-03	H3	High
12	14565	20443	5878	2	Terminal	H3-03	H3	High
13	8656	228285	219629	238	Terminal	H3-03	H3	High
14	10071	39687	29616	44	Terminal	H3-03	H3	High
6	14140	121279	107139	43	Terminal	H3-04	H3	High
7	1083051	1083187	136	3	Terminal	H3-04	H3	High
7	9108	24652	15544	42	Terminal	H3-04	H3	High
7	960198	1081495	121297	86	Terminal	H3-04	H3	High
8	8987	56686	47699	33	Terminal	H3-04	H3	High
8	190413	553806	363393	185	Terminal	H3-04	H3	High
9	419267	423718	4451	2	Terminal	H3-04	H3	High
9	437339	437706	367	2	Terminal	H3-04	H3	High
9	19539	335256	315717	352	Terminal	H3-04	H3	High
11	2867	77673	74806	90	Terminal	H3-04	H3	High
14	708964	780416	71452	31	Terminal	H3-04	H3	High
16	923229	937017	13788	7	Terminal	H3-04	H3	High
2	274413	802154	527741	370	Terminal	H3-05	H3	High
4	11751	104899	93148	77	Terminal	H3-05	H3	High
4	1412981	1523071	110090	212	Terminal	H3-05	H3	High
5	6847	28574	21727	91	Terminal	H3-05	H3	High
12	320958	1061580	740622	716	Terminal	H3-05	H3	High
14	10180	10473	293	2	Terminal	H3-05	H3	High
16	887924	937017	49093	59	Terminal	H3-05	H3	High
3	11232	78098	66866	27	Terminal	H3-06	H3	High
4	772121	1523727	751606	461	Terminal	H3-06	H3	High
5	8474	36707	28233	41	Terminal	H3-06	H3	High
6	7686	8311	625	6	Terminal	H3-06	H3	High
7	1083051	1083167	116	2	Terminal	H3-06	H3	High
7	13362	400707	387345	131	Terminal	H3-06	H3	High
13	409424	912313	502889	209	Terminal	H3-06	H3	High
3	305678	307001	1323	5	Terminal	H3-07	H3	High
8	9899	10648	749	2	Terminal	H3-07	H3	High
11	2867	8417	5550	7	Terminal	H3-07	H3	High
11	9223	18803	9580	14	Terminal	H3-07	H3	High
12	1058893	1059295	402	2	Terminal	H3-07	H3	High
13	10536	11558	1022	2	Terminal	H3-07	H3	High
13	17647	18819	1172	3	Terminal	H3-07	H3	High
13	8702	10032	1330	5	Terminal	H3-07	H3	High
13	13698	14774	1076	8	Terminal	H3-07	H3	High
14	781294	781408	114	3	Terminal	H3-07	H3	High
2	738343	809337	70994	52	Terminal	H3-08	H3	High
2	12348	512686	500338	231	Terminal	H3-08	H3	High
3	305678	309984	4306	12	Terminal	H3-08	H3	High
3	11268	302632	291364	154	Terminal	H3-08	H3	High
4	1408313	1523678	115365	195	Terminal	H3-08	H3	High
5	6847	568386	561539	348	Terminal	H3-08	H3	High
6	13973	253828	239855	115	Terminal	H3-08	H3	High
7	841836	1075666	233830	161	Terminal	H3-08	H3	High
7	4682	841431	836749	546	Terminal	H3-08	H3	High
8	9665	36446	26781	42	Terminal	H3-08	H3	High
9	421486	424300	2814	2	Terminal	H3-08	H3	High
10	22888	727950	705062	246	Terminal	H3-08	H3	High
11	2867	657519	654652	302	Terminal	H3-08	H3	High
12	888338	1059477	171139	155	Terminal	H3-08	H3	High
12	15538	687226	671688	414	Terminal	H3-08	H3	High
13	8523	917106	908583	615	Terminal	H3-08	H3	High
14	758876	781408	22532	22	Terminal	H3-08	H3	High
14	15025	365231	350206	195	Terminal	H3-08	H3	High
15	12683	59685	47002	27	Terminal	H3-08	H3	High
16	49213	948024	898811	574	Terminal	H3-08	H3	High
7	1083051	1083167	116	2	Terminal	H3-09	H3	High
9	420418	424300	3882	2	Terminal	H3-09	H3	High
9	429526	429602	76	2	Terminal	H3-09	H3	High
11	4278	94984	90706	77	Terminal	H3-09	H3	High
12	652247	1059978	407731	312	Terminal	H3-09	H3	High
16	659714	942520	282806	155	Terminal	H3-09	H3	High
3	305983	308492	2509	7	Terminal	H3-10	H3	High
3	11268	70954	59686	49	Terminal	H3-10	H3	High
4	838170	1523226	685056	673	Terminal	H3-10	H3	High
8	8987	41739	32752	31	Terminal	H3-10	H3	High
9	428306	428388	82	2	Terminal	H3-10	H3	High
9	427020	427134	114	3	Terminal	H3-10	H3	High
9	19539	231364	211825	237	Terminal	H3-10	H3	High
10	15964	275663	259699	43	Terminal	H3-10	H3	High
11	640847	657519	16672	4	Terminal	H3-10	H3	High
12	409837	1061460	651623	578	Terminal	H3-10	H3	High
13	8537	22228	13691	33	Terminal	H3-10	H3	High
14	14867	327113	312246	166	Terminal	H3-10	H3	High
3	306097	306851	754	7	Terminal	H3-11	H3	High
4	1517521	1517726	205	2	Terminal	H3-11	H3	High
4	1512340	1512701	361	3	Terminal	H3-11	H3	High
7	1083051	1083148	97	2	Terminal	H3-11	H3	High
1	180916	212931	32015	64	Terminal	H3-12	H3	High
2	9526	160691	151165	39	Terminal	H3-12	H3	High
3	11232	78532	67300	139	Terminal	H3-12	H3	High
5	553226	568386	15160	3	Terminal	H3-12	H3	High
5	6847	40550	33703	154	Terminal	H3-12	H3	High
7	955565	1077356	121791	284	Terminal	H3-12	H3	High
8	8987	51514	42527	93	Terminal	H3-12	H3	High
11	18626	22180	3554	7	Terminal	H3-12	H3	High
12	720897	1061592	340695	756	Terminal	H3-12	H3	High
14	13749	64833	51084	129	Terminal	H3-12	H3	High
15	2225	44363	42138	6	Terminal	H3-12	H3	High
2	10964	809337	798373	453	Terminal	H3-13	H3	High
3	305678	306673	995	6	Terminal	H3-13	H3	High
3	11268	302632	291364	217	Terminal	H3-13	H3	High
4	11796	1523071	1511275	1201	Terminal	H3-13	H3	High
5	7205	568386	561181	407	Terminal	H3-13	H3	High
6	9001	250511	241510	142	Terminal	H3-13	H3	High
7	3927	1075666	1071739	771	Terminal	H3-13	H3	High
8	8987	539159	530172	353	Terminal	H3-13	H3	High
9	24249	438162	413913	378	Terminal	H3-13	H3	High
10	367212	735999	368787	199	Terminal	H3-13	H3	High
11	2867	657519	654652	320	Terminal	H3-13	H3	High
12	790682	1059171	268489	295	Terminal	H3-13	H3	High
13	8523	38750	30227	55	Terminal	H3-13	H3	High
13	40411	917106	876695	643	Terminal	H3-13	H3	High
14	9920	781048	771128	503	Terminal	H3-13	H3	High
15	101047	1075380	974333	629	Terminal	H3-13	H3	High
16	33864	934076	900212	624	Terminal	H3-13	H3	High
3	102306	306855	204549	240	Terminal	H3-14	H3	High
4	1125614	1523727	398113	594	Terminal	H3-14	H3	High
7	1083051	1083148	97	2	Terminal	H3-14	H3	High
9	432550	433026	476	3	Terminal	H3-14	H3	High
9	19539	289412	269873	423	Terminal	H3-14	H3	High
10	15964	21123	5159	2	Terminal	H3-14	H3	High
12	13757	14565	808	2	Terminal	H3-14	H3	High
12	475526	1061931	586405	800	Terminal	H3-14	H3	High
14	781294	781408	114	3	Terminal	H3-14	H3	High
3	206398	302687	96289	47	Terminal	H3-15	H3	High
7	1078404	1083187	4783	7	Terminal	H3-15	H3	High
9	431022	431274	252	5	Terminal	H3-15	H3	High
12	1060098	1061592	1494	2	Terminal	H3-15	H3	High
14	14494	18719	4225	3	Terminal	H3-15	H3	High
2	640764	802154	161390	144	Terminal	H3-16	H3	High
4	1505557	1512984	7427	60	Terminal	H3-16	H3	High
4	1513727	1522560	8833	60	Terminal	H3-16	H3	High
5	329751	568386	238635	72	Terminal	H3-16	H3	High
5	6847	30851	24004	80	Terminal	H3-16	H3	High
6	7730	8947	1217	2	Terminal	H3-16	H3	High
7	13855	14033	178	2	Terminal	H3-16	H3	High
9	431728	431988	260	2	Terminal	H3-16	H3	High
9	426747	426880	133	3	Terminal	H3-16	H3	High
14	13671	130676	117005	133	Terminal	H3-16	H3	High
2	10964	40257	29293	4	Terminal	H3-17	H3	High
3	305914	306958	1044	8	Terminal	H3-17	H3	High
3	240465	302687	62222	44	Terminal	H3-17	H3	High
3	11268	70514	59246	59	Terminal	H3-17	H3	High
4	11796	210987	199191	132	Terminal	H3-17	H3	High
5	341116	568386	227270	74	Terminal	H3-17	H3	High
7	3978	19298	15320	24	Terminal	H3-17	H3	High
7	949671	1074295	124624	161	Terminal	H3-17	H3	High
9	421486	424300	2814	2	Terminal	H3-17	H3	High
9	430146	430253	107	2	Terminal	H3-17	H3	High
9	432550	433026	476	3	Terminal	H3-17	H3	High
12	14565	26753	12188	5	Terminal	H3-17	H3	High
12	1003015	1061209	58194	28	Terminal	H3-17	H3	High
14	10831	60418	49587	61	Terminal	H3-17	H3	High
14	694095	781048	86953	82	Terminal	H3-17	H3	High
1	196742	212931	16189	3	Terminal	H3-18	H3	High
2	10964	85137	74173	13	Terminal	H3-18	H3	High
4	11864	351054	339190	214	Terminal	H3-18	H3	High
5	335875	568386	232511	68	Terminal	H3-18	H3	High
5	6847	25358	18511	70	Terminal	H3-18	H3	High
7	4142	402444	398302	306	Terminal	H3-18	H3	High
8	9665	31989	22324	36	Terminal	H3-18	H3	High
10	727505	727897	392	9	Terminal	H3-18	H3	High
10	672643	727090	54447	81	Terminal	H3-18	H3	High
11	592123	657519	65396	40	Terminal	H3-18	H3	High
11	2867	78273	75406	126	Terminal	H3-18	H3	High
12	1054568	1059751	5183	10	Terminal	H3-18	H3	High
12	14565	99073	84508	32	Terminal	H3-18	H3	High
14	755612	779432	23820	26	Terminal	H3-18	H3	High
16	905037	940754	35717	44	Terminal	H3-18	H3	High
4	1492240	1523727	31487	110	Terminal	H3-19	H3	High
7	1078425	1082215	3790	2	Terminal	H3-19	H3	High
7	10730	229607	218877	129	Terminal	H3-19	H3	High
2	9526	182082	172556	19	Terminal	H3-20	H3	High
3	212177	302687	90510	34	Terminal	H3-20	H3	High
5	423700	567785	144085	15	Terminal	H3-20	H3	High
6	249515	253044	3529	2	Terminal	H3-20	H3	High
7	971402	1079192	107790	81	Terminal	H3-20	H3	High
9	437343	437573	230	2	Terminal	H3-20	H3	High
10	705485	728013	22528	57	Terminal	H3-20	H3	High
11	6746	68684	61938	84	Terminal	H3-20	H3	High
12	873522	1061056	187534	120	Terminal	H3-20	H3	High
13	8537	47113	38576	43	Terminal	H3-20	H3	High
13	775271	905645	130374	43	Terminal	H3-20	H3	High
[truncated: 20,830 more rows]
