# Supplementary material for: Loss of heterozygosity results in rapid but variable genome homogenization across yeast genetic backgrounds
Source: eLife. 2021 Jun 23;10:e70339. doi: 10.7554/eLife.70339 (PMC8245132; doi:10.7554/eLife.70339)
Supplement: Supplementary file 4. — SV-percentage spore viability in the MA lines; statistical significance of differences in spore viability between ancestral diploid and the derived MA lines were determined using the p-values from Fisher’s exact test (GraphPad prism). N – number of tetrads analyzed for spore viability, ns – not significant; p>0.05. [file elife-70339-supp4.xlsx]

## Sheet: Sheet1
Supplementary file 4 - Meiotic spore viability in the MA lines, H9-8 and H9-11 excluded as they did not sporulate. SV-percentage spore viability in the MA lines; Statistical significance of differences in spore viability between ancestral diploid and the derived MA lines were determined using the p values from Fisher’s exact test (Graphpad prism).
N-number of tetrads analyzed for spore viability, n.s.-p value >0.05
Strain/ Line ID	N	SV	p-Value
H1_ancestor	24	0.916667	NA
H2_ancestor	24	0.927083	NA
H3_ancestor	24	0.895833	NA
H4_ancestor	48	0.432292	NA
H5_ancestor	48	0.458333	NA
H6_ancestor	48	0.760417	NA
H7_ancestor	48	0.78125	NA
H8_ancestor	52	0.355769	NA
H9_ancestor	48	0.614583	NA
H1-1	24	0.927083	n.s.
H1-2	24	1	0.0067
H1-3	24	0.885417	n.s.
H1-4	24	0.958333	n.s.
H1-5	25	0.9	n.s.
H1-6	24	0.885417	n.s.
H1-7	24	0.916667	n.s.
H1-8	24	0.927083	n.s.
H1-9	24	0.96875	n.s.
H1-10	24	0.958333	n.s.
H1-11	24	1	0.0067
H1-12	24	0.958333	n.s.
H1-13	24	0.927083	n.s.
H1-14	24	0.916667	n.s.
H1-15	24	0.958333	n.s.
H1-16	24	0.90625	n.s.
H1-17	24	0.958333	n.s.
H1-18	24	0.895833	n.s.
H1-19	24	0.90625	n.s.
H1-20	24	1	0.0067
H2-1	24	0.958333	n.s.
H2-2	24	0.885417	n.s.
H2-3	24	0.958333	n.s.
H2-4	25	0.9	n.s.
H2-5	24	0.927083	n.s.
H2-6	24	0.916667	n.s.
H2-7	24	0.958333	n.s.
H2-8	24	0.96875	n.s.
H2-9	24	0.927083	n.s.
H2-10	24	0.916667	n.s.
H2-11	24	0.958333	n.s.
H2-12	24	0.90625	n.s.
H3-1	24	0.958333	n.s.
H3-2	24	0.895833	n.s.
H3-3	24	0.916667	n.s.
H3-4	24	0.927083	n.s.
H3-5	24	0.927083	n.s.
H3-6	24	0.916667	n.s.
H3-7	24	0.958333	n.s.
H3-8	24	0.958333	n.s.
H3-9	24	0.958333	n.s.
H3-10	24	1	n.s.
H3-11	24	0.958333	n.s.
H3-12	24	0.927083	n.s.
H3-13	24	0.989583	0.0096
H3-14	24	0.916667	n.s.
H3-15	24	0.927083	n.s.
H3-16	24	0.96875	n.s.
H3-17	24	0.958333	n.s.
H3-18	24	1	n.s.
H3-19	24	0.958333	n.s.
H3-20	24	0.927083	n.s.
H4-1	48	0.552083	0.024
H4-2	48	0.541667	0.041
H4-3	48	0.53125	0.07
H4-4	48	0.546875	0.031
H4-5	48	0.520833	0.1
H4-6	48	0.541667	0.0134
H4-7	48	0.5625	0.014
H4-8	48	0.578125	0.0058
H4-9	48	0.5	0.2
H4-10	48	0.541667	0.041
H4-11	50	0.6	0.0012
H4-12	48	0.53125	0.07
H4-13	48	0.520833	0.1
H4-14	48	0.53125	0.06
H4-15	48	0.552083	0.024
H4-16	48	0.552083	0.024
H4-17	48	0.46875	0.54
H4-18	48	0.520833	0.1
H4-19	48	0.515625	0.12
H4-20	48	0.5625	0.014
H5-1	48	0.557292	n.s.
H5-2	48	0.5625	n.s.
H5-3	48	0.598958	0.0078
H5-4	48	0.484375	n.s.
H5-5	48	0.567708	0.041
H5-6	50	0.54	n.s.
H5-7	48	0.552083	n.s.
H5-8	48	0.53125	n.s.
H5-9	45	0.522222	n.s.
H5-10	48	0.567708	0.041
H5-11	48	0.557292	n.s.
H5-12	48	0.546875	n.s.
H5-13	48	0.567708	0.041
H5-14	48	0.9375	<0.00001
H5-15	48	0.505208	n.s.
H5-16	48	0.541667	n.s.
H5-17	48	0.53125	n.s.
H5-18	48	0.557292	n.s.
H5-19	48	0.53125	n.s.
H5-20	48	0.557292	n.s.
H6-1	48	0.802083	n.s.
H6-2	48	0.8125	n.s.
H6-3	48	0.833333	n.s.
H6-4	48	0.817708	n.s.
H6-5	48	0.9375	<0.00001
H6-6	48	0.895833	0.0006
H6-7	48	0.807292	n.s.
H6-8	48	0.807292	n.s.
H6-9	49	0.714286	n.s.
H6-10	50	0.805	n.s.
H6-11	50	0.78	n.s.
H6-12	52	0.706731	n.s.
H6-13	51	0.79902	n.s.
H6-14	48	0.807292	n.s.
H6-15	50	0.705	n.s.
H6-16	50	0.815	n.s.
H6-17	48	0.927083	<0.00001
H6-18	24	0.958333	<0.00001
H6-19	24	0.84375	n.s.
H6-20	48	0.567708	0.0001
H7-1	48	0.770833	n.s.
H7-2	48	0.796875	n.s.
H7-3	48	0.567708	<0.00001
H7-4	48	0.84375	n.s.
H7-5	48	0.760417	n.s.
H7-6	48	0.807292	n.s.
H7-7	48	0.807292	n.s.
H7-8	48	0.630208	0.0017
H7-9	50	0.805	n.s.
H7-10	50	0.78	n.s.
H7-11	48	0.697917	n.s.
H7-12	48	0.802083	n.s.
H7-14	48	0.755208	n.s.
H7-15	48	0.71875	n.s.
H7-16	45	0.805556	n.s.
H7-17	48	0.890625	0.005
H7-18	48	0.78125	n.s.
H7-19	48	0.901042	0.002
H8-1	44	0.460227	0.047
H8-2	48	0.484375	0.01
H8-3	48	0.494792	0.006
H8-4	48	0.885417	<0.00001
H8-5	48	0.53125	0.0004
H8-6	48	0.885417	<0.00001
H8-7	53	0.5	0.0031
H8-8	48	0.385417	n.s.
H8-9	48	0.552083	0.0001
H8-10	50	0.505	0.0027
H8-11	49	0.55102	0.0001
H8-12	48	0.567708	<0.00001
H8-13	48	0.552083	0.0001
H8-15	48	0.489583	0.008
H8-16	48	0.505208	0.0033
H8-17	48	0.567708	<0.00001
H8-18	51	0.573529	<0.00001
H8-19	48	0.484375	0.01
H8-20	48	0.505208	0.033
H9-1	48	0.854167	<0.00001
H9-2	48	0.770833	0.0013
H9-3	48	0.765625	0.0019
H9-4	48	0.927083	<0.00001
H9-5	48	0.697917	n.s.
H9-6	48	0.619792	n.s.
H9-7	48	0.927083	<0.00001
H9-9	48	0.880208	<0.00001
H9-10	49	0.688776	n.s.
H9-12	48	0.692708	n.s.
H9-13	48	0.619792	n.s.
H9-14	48	0.9375	<0.00001
H9-15	48	0.635417	n.s.
H9-16	48	0.583333	n.s.
H9-17	48	0.625	n.s.
H9-18	48	0.604167	n.s.
H9-19	48	0.645833	n.s.
H7-20	48	0.78125	n.s.
