# Supplementary material for: Loss of heterozygosity results in rapid but variable genome homogenization across yeast genetic backgrounds
Source: eLife. 2021 Jun 23;10:e70339. doi: 10.7554/eLife.70339 (PMC8245132; doi:10.7554/eLife.70339)
Supplement: Supplementary file 5. — Multi-nucleotide mutations (MNMs) highlighted in purple. [file elife-70339-supp5.xlsx]

## Sheet: Sheet1
Supplementary file 5- List of SNMs and MNMs identified in the MA lines. MNMs are highlighted.
Chromosome	Position	Line ID	Ref allele	Alt allele	Status
Chr 7	138	H1-01	G	T	Het
Chr 5	144	H1-08	T	A	Het
Chr 3	972	H9-04	A	G	Het
Chr 8	1399	H1-08	G	T	Het
Chr 11	1593	H6-13	G	T	Het
Chr 4	2153	H3-3	G	A	Het
Chr 15	5291	H8-17	T	G	Het
Chr 7	5675	H2-20	T	G	Het
Chr 6	5967	H1-17	G	A	Het
Chr 6	6002	H1-18	C	T	Het
Chr 3	6008	H9-04	C	G	Het
Chr 3	6344	H9-04	G	A	Het
Chr 6	6353	H1-08	G C	A A	Het
Chr 5	6486	H4-3	A	G	Het
Chr 6	6542	H6-17	T	G	Het
Chr 7	6836	H4-1	C	A	Het
Chr 8	7456	H9-14	A	G	Het
Chr 2	7788	H5-3	C	A	Het
Chr 14	7906	H2-16	G	A	Het
Chr 7	7966	H9-04	G	A	Het
Chr 9	8317	H9-01	T	C	Het
Chr 9	8320	H9-01	G	A	Het
Chr 14	9214	H9-14	G	A	Het
Chr 14	9229	H9-14	G	A	Het
Chr 14	9236	H9-14	A	G	Het
Chr 14	9288	H9-14	T	C	Het
Chr 15	11942	H9-04	G	A	Het
Chr 7	12165	H7-13	G	C	Het
Chr 1	12269	H6-13	C	T	Het
Chr 1	12618	H4-20	T	C	Het
Chr 8	12630	H8-10	T	C	Het
Chr 1	13284	H1-03	G	T	Het
Chr 6	13690	H9-01	C	T	Het
Chr 14	14062	H1-15	G	T	Het
Chr 13	14299	H7-16	T	C	Het
Chr 6	14608	H9-04	A	G	Het
Chr 7	14637	H9-18	A	G	Het
Chr 12	16971	H9-15	G	A	Het
Chr 12	17015	H4-10	G	A	Het
Chr 14	17215	H2-10	G	C	Het
Chr 14	17219	H2-10	T	C	Het
Chr 2	18141	H9-02	C	T	Het
Chr 13	18411	H9-15	A	G	Het
Chr 5	20302	H9-04	G	T	Het
Chr 5	20305	H9-04	C	T	Het
Chr 16	21222	H1-09	G	A	Het
Chr 8	21525	H4-16	C	T	Het
Chr 6	21599	H9-09	A	G	Het
Chr 16	21690	H2-15	AG	CA	Het
Chr 7	21892	H3-15	CAG	ACA	Het
Chr 15	22176	H5-20	A	G	Het
Chr 15	23647	H1-01	A	T	Het
Chr 3	24504	H8-16	A	C	Het
Chr 13	24568	H7-20	G	A	Het
Chr 13	25552	H8-16	A	T	Het
Chr 7	27002	H8-15	A	G	Het
Chr 15	27930	H1-03	C	G	Het
Chr 16	28101	H4-6	G	T	Het
Chr 15	29144	H2-20	A	C	Het
Chr 15	29999	H4-17	A	G	Het
Chr 6	30085	H1-01	T	A	Het
Chr 1	30202	H3-12	C	T	Het
Chr 15	31099	H9-11	G	T	Het
Chr 16	32229	H1-16	C	A	Het
Chr 16	32917	H3-7	G	A	Het
Chr 2	33550	H1-03	G	A	Het
Chr 13	33680	H3-7	T	C	Het
Chr 13	33903	H8-12	A	G	Het
Chr 4	34051	H4-20	A	G	Het
Chr 12	34137	H5-11	C	T	Het
Chr 4	34394	H9-15	C	T	Het
Chr 16	37125	H6-12	A	C	Het
Chr 1	37147	H1-03	C	T	Het
Chr 4	37243	H4-20	G	A	Het
Chr 12	37489	H5-7	C	A	Het
Chr 13	37845	H8-18	A	T	Het
Chr 8	37931	H5-10	T	A	Het
Chr 10	43709	H6-13	T	C	Het
Chr 5	44059	H9-17	A	C	Het
Chr 2	44075	H9-05	T	C	Het
Chr 4	44306	H3-17	A	T	Het
Chr 4	44309	H3-17	A	T	Het
Chr 7	46634	H2-16	A	G	Het
Chr 4	46774	H9-11	A	G	Het
Chr 8	47011	H9-05	C	A	Het
Chr 7	49371	H4-17	T	A	Het
Chr 13	50860	H8-13	G	A	Het
Chr 8	51671	H4-19	A	G	Het
Chr 7	53334	H3-19	A	G	Het
Chr 7	54205	H4-2	C	G	Het
Chr 10	54534	H4-1	G	A	Het
Chr 9	55011	H1-08	T	C	Het
Chr 3	56979	H3-7	G	A	Het
Chr 15	59973	H6-16	A	G	Het
Chr 10	61814	H7-15	G	A	Het
Chr 4	64507	H6-14	G	A	Het
Chr 12	64859	H6-10	G	T	Het
Chr 1	66238	H6-13	G	A	Het
Chr 13	67183	H9-18	C	T	Het
Chr 8	69180	H4-16	G	A	Het
Chr 2	70549	H6-19	G	T	Het
Chr 6	71424	H1-11	C	G	Het
Chr 5	72457	H8-12	C	T	Het
Chr 5	73233	H5-6	A	G	Het
Chr 10	74905	H3-6	G	A	Het
Chr 7	76194	H3-7	C	G	Het
Chr 13	78101	H4-3	T	C	Het
Chr 15	79304	H8-16	A	T	Het
Chr 2	79865	H9-05	C	A	Het
Chr 5	81181	H5-9	A	G	Het
Chr 11	87934	H6-16	A	T	Het
Chr 13	88622	H5-8	T	C	Het
Chr 2	89547	H8-12	G	A	Het
Chr 3	90918	H1-11	A	G	Het
Chr 15	93175	H8-11	A	T	Het
Chr 14	93369	H6-07	G	A	Het
Chr 2	93735	H5-2	T	A	Het
Chr 4	93973	H2-18	A	G	Het
Chr 10	94841	H4-14	A	T	Het
Chr 4	94972	H9-17	C	T	Het
Chr 5	97323	H6-12	C	T	Het
Chr 15	97793	H9-18	T	C	Het
Chr 4	98559	H9-15	A	C	Het
Chr 11	99191	H2-13	A	G	Het
Chr 13	101452	H9-19	G	T	Het
Chr 15	102304	H1-19	G	A	Het
Chr 12	103613	H4-2	GG	AA	Het
Chr 9	103859	H2-17	G	A	Het
Chr 11	106126	H5-12	A	G	Het
Chr 16	106555	H5-18	A	G	Het
Chr 2	107206	H1-01	C	A	Het
Chr 8	107488	H9-16	A	C	Het
Chr 15	107620	H5-12	C	G	Het
Chr 13	108386	H6-09	A	G	Het
Chr 6	108637	H9-01	C	A	Het
Chr 5	109639	H1-14	C	A	Het
Chr 12	110108	H5-9	A	T	Het
Chr 7	112937	H6-19	T	G	Het
Chr 7	112943	H6-19	A	G	Het
Chr 11	115797	H2-10	A	G	Het
Chr 3	120900	H2-18	G	A	Het
Chr 15	121075	H9-02	T	C	Het
Chr 12	123810	H6-15	A	G	Het
Chr 12	125325	H9-08	G	A	Het
Chr 7	125337	H4-20	G	T	Het
Chr 5	125830	H6-20	T	C	Het
Chr 3	127307	H3-7	G	A	Het
Chr 11	127752	H5-16	C	T	Het
Chr 4	128873	H8-13	T	A	Het
Chr 4	128885	H8-13	CG	TA	Het
Chr 12	129222	H6-16	A	T	Het
Chr 12	129494	H9-17	G	T	Het
Chr 7	131912	H9-16	G	T	Het
Chr 3	132079	H6-16	A	C	Het
Chr 4	132747	H4-19	T	A	Het
Chr 10	133040	H8-19	G	A	Het
Chr 4	134809	H3-4	C	T	Het
Chr 10	134936	H1-04	T	A	Het
Chr 14	134959	H6-04	T	G	Het
Chr 9	136407	H2-15	G	A	Het
Chr 14	136413	H4-16	C	A	Het
Chr 13	136602	H1-14	T	C	Het
Chr 13	138729	H8-13	T	G	Het
Chr 15	140385	H4-19	C	T	Het
Chr 16	141040	H6-10	G	A	Het
Chr 1	144328	H6-13	C	A	Het
Chr 11	144754	H2-14	C	T	Het
Chr 11	144781	H9-04	T	C	Het
Chr 16	147622	H2-12	T	A	Het
Chr 8	147816	H8-4	T	A	Het
Chr 8	147817	H8-4	T	A	Het
Chr 4	148274	H3-20	T	C	Het
Chr 5	148602	H1-03	G	C	Het
Chr 7	148891	H3-7	C	T	Het
Chr 10	149272	H5-19	G	T	Het
Chr 9	149341	H2-18	G	T	Het
Chr 5	150265	H9-16	C	T	Het
Chr 2	150781	H4-3	T	C	Het
Chr 2	154999	H4-17	T	G	Het
Chr 8	155635	H4-7	G	A	Het
Chr 15	156746	H4-12	A	G	Het
Chr 7	156753	H4-16	A	T	Het
Chr 8	157721	H4-20	T	A	Het
Chr 5	158761	H2-11	C	T	Het
Chr 8	159082	H8-6	T	A	Het
Chr 2	159118	H6-18	C	G	Het
Chr 11	160132	H1-08	C	A	Het
Chr 15	160438	H2-19	C	T	Het
Chr 15	162252	H8-7	T	A	Het
Chr 15	162719	H6-05	C	A	Het
Chr 13	162799	H8-13	A	T	Het
Chr 13	162884	H1-01	T A	G G	Het
Chr 2	163967	H4-11	A	G	Het
Chr 10	164076	H8-6	T	G	Het
Chr 10	164077	H8-6	C	A	Het
Chr 16	164592	H2-10	T	G	Het
Chr 2	167941	H8-13	C	T	Het
Chr 3	168169	H4-3	A	G	Het
Chr 2	168610	H3-15	G	T	Het
Chr 8	172603	H1-20	G	A	Het
Chr 13	173441	H3-3	T	A	Het
Chr 4	175125	H6-11	C	T	Het
Chr 7	176937	H3-4	T	C	Het
Chr 14	177866	H6-11	G	A	Het
Chr 16	179412	H1-07	C	A	Het
Chr 12	179892	H6-16	A	T	Het
Chr 7	180628	H9-02	C	T	Het
Chr 11	182679	H5-17	A	T	Het
Chr 3	182869	H6-09	G	A	Het
Chr 13	183800	H2-9	A	T	Het
Chr 13	183815	H2-9	TA	CC	Het
Chr 13	183824	H2-9	G	T	Het
Chr 8	184138	H2-9	C	T	Het
Chr 11	184501	H1-18	G	A	Het
Chr 15	188491	H1-11	A	T	Het
Chr 6	189110	H1-01	G	A	Het
Chr 16	189526	H4-20	C	G	Het
Chr 8	189764	H5-4	A	G	Het
Chr 15	190903	H6-07	A	T	Het
Chr 6	191655	H8-1	C	T	Het
Chr 1	191845	H3-7	G	A	Het
Chr 2	193394	H4-1	C	T	Het
Chr 16	193869	H8-6	T	C	Het
Chr 16	194050	H9-04	C	T	Het
Chr 2	195246	H6-08	C	A	Het
Chr 5	195948	H6-14	A	G	Het
Chr 13	198376	H9-18	A	T	Het
Chr 5	199772	H1-08	G	T	Het
Chr 11	202996	H9-04	A	G	Het
Chr 1	203786	H9-04	T	C	Het
Chr 1	203789	H9-04	C	T	Het
Chr 1	203795	H9-04	T	C	Het
Chr 1	203808	H9-04	G	A	Het
Chr 1	203810	H9-04	A	C	Het
Chr 2	204050	H5-18	C	T	Het
Chr 15	204512	H5-20	C	A	Het
Chr 8	204738	H9-16	A	C	Het
Chr 2	205780	H9-11	C	T	Het
Chr 1	206064	H5-2	G	A	Het
Chr 1	206066	H5-20	C	T	Het
Chr 1	206270	H9-04	A	G	Het
Chr 1	206315	H2-20	C	T	Het
Chr 6	207652	H2-17	G	A	Het
Chr 12	208278	H7-16	C	T	Het
Chr 1	208499	H1-14	G	A	Het
Chr 7	208570	H5-6	G	A	Het
Chr 12	210659	H8-11	A	T	Het
Chr 9	210693	H1-01	A	G	Het
Chr 16	211047	H2-9	C	A	Het
Chr 15	211667	H5-1	T	C	Het
Chr 10	211696	H9-08	G	T	Het
Chr 4	212616	H8-17	T	C	Het
Chr 15	213335	H4-6	A	G	Het
Chr 2	216794	H2-9	T	C	Het
Chr 4	217745	H5-4	G	C	Het
Chr 16	221710	H4-3	G	A	Het
Chr 16	221729	H4-3	T	A	Het
Chr 3	222533	H5-4	G	A	Het
Chr 13	223500	H2-11	C	T	Het
Chr 16	224116	H6-14	T	C	Het
Chr 12	224760	H3-7	C	T	Het
Chr 15	225208	H9-08	C	T	Het
Chr 13	225831	H4-16	A	G	Het
Chr 7	226063	H2-20	A	G	Het
Chr 5	226955	H7-11	A	C	Het
Chr 10	227393	H8-1	T	C	Het
Chr 13	227401	H2-17	G	A	Het
Chr 5	227406	H2-13	G	A	Het
Chr 4	227641	H8-1	G	A	Het
Chr 14	228519	H1-06	G	C	Het
Chr 15	230837	H8-3	C	G	Het
Chr 4	233134	H2-18	A	G	Het
Chr 11	233216	H2-17	C	A	Het
Chr 8	233237	H8-3	C	T	Het
Chr 13	234660	H6-15	G	T	Het
Chr 13	235479	H6-20	G	A	Het
Chr 13	236416	H4-18	T	G	Het
Chr 16	236621	H6-14	A	G	Het
Chr 8	237030	H2-15	A	G	Het
Chr 9	238111	H5-1	C	T	Het
Chr 8	238615	H9-16	G	T	Het
Chr 15	238827	H8-12	A	G	Het
Chr 5	239097	H5-3	T	A	Het
Chr 4	241159	H7-3	T	C	Het
Chr 15	244687	H8-20	C	T	Het
Chr 7	244856	H4-12	C	G	Het
Chr 7	245291	H1-14	C	A	Het
Chr 6	245578	H4-19	T	A	Het
Chr 9	247495	H1-14	C	A	Het
Chr 7	247869	H4-16	T	A	Het
Chr 6	249889	H9-14	T	G	Het
Chr 11	249915	H2-11	T	C	Het
Chr 7	252303	H2-19	A	T	Het
Chr 10	253753	H7-11	C	A	Het
Chr 6	255149	H9-01	C	T	Het
Chr 6	259119	H9-01	T	G	Het
Chr 9	260232	H7-7	C	T	Het
Chr 14	261149	H4-14	C	T	Het
Chr 5	261160	H6-09	G	A	Het
Chr 10	262925	H8-4	A	G	Het
Chr 15	263454	H7-8	G	T	Het
Chr 5	264848	H8-20	A	T	Het
Chr 14	265688	H3-7	T	G	Het
Chr 15	269224	H2-9	T	A	Het
Chr 9	269835	H2-17	C	T	Het
Chr 4	269895	H7-14	T	C	Het
Chr 14	270150	H8-2	A	T	Het
Chr 10	270752	H5-3	C	A	Het
Chr 10	270767	H5-4	A	G	Het
Chr 16	276167	H4-17	T	A	Het
Chr 2	277417	H9-07	T	A	Het
Chr 2	277438	H9-07	G	A	Het
Chr 10	278260	H6-08	G	C	Het
Chr 4	278671	H7-1	C	T	Het
Chr 2	279600	H4-20	T	C	Het
Chr 10	279687	H4-19	C	G	Het
Chr 11	280791	H6-12	C	T	Het
Chr 14	280923	H1-10	C	A	Het
Chr 12	281539	H7-4	G	T	Het
Chr 11	282549	H6-12	A	T	Het
Chr 13	282738	H4-14	G	A	Het
Chr 14	285068	H5-1	G	A	Het
Chr 3	286153	H5-4	G	A	Het
Chr 4	287301	H3-15	C	T	Het
Chr 5	288542	H1-08	G	T	Het
Chr 13	291044	H9-02	C	T	Het
Chr 5	293304	H9-19	C	A	Het
Chr 11	293598	H9-15	G	A	Het
Chr 10	293697	H3-15	C	T	Het
Chr 10	296685	H1-12	C	A	Het
Chr 15	297155	H3-9	T	G	Het
Chr 16	297335	H5-10	A	T	Het
Chr 12	300942	H1-13	G	A	Het
Chr 2	301736	H9-11	G	T	Het
Chr 11	303432	H8-13	T	C	Het
Chr 11	303435	H8-15	C	T	Het
Chr 4	303736	H6-08	G	A	Het
Chr 8	303767	H5-18	T	A	Het
Chr 3	304079	H4-19	G	C	Het
Chr 14	304330	H1-18	C	T	Het
Chr 3	305288	H5-9	A	T	Het
Chr 3	307317	H9-01	T	C	Het
Chr 12	307324	H4-17	G	A	Het
Chr 5	308278	H5-4	G	C	Het
Chr 8	310569	H4-3	T	A	Het
Chr 16	310686	H5-7	C	T	Het
Chr 11	314054	H5-8	A	G	Het
Chr 12	314272	H5-20	T	A	Het
Chr 3	314387	H4-17	G	T	Het
Chr 3	314390	H9-04	C	G	Het
Chr 8	315558	H3-11	C	T	Het
Chr 7	315731	H3-7	G	A	Het
Chr 13	319851	H9-05	C	A	Het
Chr 2	320226	H8-10	A	G	Het
Chr 6	320258	H9-18	C	T	Het
Chr 5	320982	H3-16	T	A	Het
Chr 5	321565	H5-16	A	T	Het
Chr 7	321781	H5-12	T	C	Het
Chr 13	324169	H7-7	A	T	Het
Chr 10	324369	H7-11	A	T	Het
Chr 9	325047	H1-14	T	C	Het
Chr 12	325255	H4-12	A	G	Het
Chr 14	325920	H9-03	A	G	Het
Chr 10	328451	H3-19	A	G	Het
Chr 5	333901	H9-12	G	A	Het
Chr 9	334887	H9-01	T	C	Het
Chr 14	335341	H3-7	A	T	Het
Chr 2	335546	H1-19	G	A	Het
Chr 2	336700	H6-07	T	C	Het
Chr 11	337777	H3-16	G	T	Het
Chr 16	340842	H4-9	T	A	Het
Chr 5	340960	H4-16	G	A	Het
Chr 2	341451	H4-12	A	G	Het
Chr 13	343019	H1-13	G	A	Het
Chr 2	344668	H4-10	G	A	Het
Chr 15	344973	H1-17	G	A	Het
Chr 14	345093	H1-13	C	G	Het
Chr 12	345968	H6-19	G	C	Het
Chr 13	346501	H7-16	T	G	Het
Chr 13	349342	H4-11	C	A	Het
Chr 11	350190	H5-10	A	G	Het
Chr 16	350370	H2-12	T	C	Het
Chr 11	351286	H9-02	G	T	Het
Chr 11	352319	H9-16	C	A	Het
Chr 11	353727	H6-09	G	A	Het
Chr 13	354117	H8-18	C	T	Het
Chr 7	354140	H8-5	G	T	Het
Chr 7	356557	H3-12	G	A	Het
Chr 4	360146	H9-15	C	T	Het
Chr 15	362126	H4-11	A	G	Het
Chr 11	366020	H9-16	C	G	Het
Chr 14	366179	H9-18	G	T	Het
Chr 11	367134	H2-14	T	C	Het
Chr 15	367258	H7-15	G	A	Het
Chr 11	368386	H9-12	A	C	Het
Chr 13	369042	H3-15	T	C	Het
Chr 9	369078	H3-7	T	C	Het
Chr 13	369092	H5-2	A	T	Het
Chr 5	370340	H1-17	G	T	Het
Chr 16	370460	H1-09	G	T	Het
Chr 2	371146	H3-20	C	T	Het
Chr 8	371252	H1-14	T	C	Het
Chr 8	371405	H9-03	T	G	Het
Chr 6	372156	H9-18	T	A	Het
Chr 16	373348	H4-17	C	T	Het
Chr 16	373642	H8-12	A	T	Het
Chr 2	374164	H8-11	C	T	Het
Chr 7	374343	H6-11	G	T	Het
Chr 9	374515	H6-14	G	A	Het
Chr 15	377924	H8-19	T	C	Het
Chr 8	379524	H6-14	C	T	Het
Chr 15	381330	H6-08	C	T	Het
Chr 5	384158	H5-17	T	C	Het
Chr 4	385408	H6-14	G	T	Het
Chr 2	385705	H5-3	T	C	Het
Chr 15	386088	H1-19	G	T	Het
Chr 8	387730	H8-2	T	A	Het
Chr 9	388841	H9-09	A	T	Het
Chr 15	389611	H4-4	G	A	Het
Chr 9	389949	H8-13	C	G	Het
Chr 12	390961	H6-13	C	A	Het
Chr 7	391249	H8-20	G	A	Het
Chr 9	391300	H9-01	A	T	Het
Chr 12	398371	H6-05	T	A	Het
Chr 9	398466	H4-3	T	A	Het
Chr 9	399281	H2-12	T	C	Het
Chr 8	399688	H4-10	G	T	Het
Chr 10	400222	H6-14	A	G	Het
Chr 15	400347	H1-06	A	G	Het
Chr 14	401578	H6-10	T	G	Het
Chr 4	403661	H8-12	A	G	Het
Chr 2	405209	H8-4	C	A	Het
Chr 14	405831	H5-12	T	A	Het
Chr 12	406382	H5-13	C	T	Het
Chr 7	406774	H4-11	G	T	Het
Chr 4	408664	H3-15	C	T	Het
Chr 9	409106	H7-20	A	T	Het
Chr 14	410626	H4-8	G	T	Het
Chr 14	415411	H7-12	G	C	Het
Chr 12	417465	H3-6	G	A	Het
Chr 5	420215	H5-6	C	T	Het
Chr 15	420487	H5-4	G	A	Het
Chr 15	420493	H5-4	C	T	Het
Chr 12	422273	H3-7	A	C	Het
Chr 12	422406	H3-4	A	T	Het
Chr 10	422953	H6-19	A	T	Het
Chr 4	425145	H9-17	A	G	Het
Chr 9	425707	H4-14	T	A	Het
Chr 12	426805	H3-7	T	G	Het
Chr 15	428174	H6-19	C	T	Het
Chr 5	428720	H7-16	C	T	Het
Chr 7	429416	H9-14	T	A	Het
Chr 2	429890	H2-16	T	C	Het
Chr 9	429951	H2-12	C	T	Het
Chr 5	432100	H6-18	A	T	Het
Chr 9	433894	H9-04	A	G	Het
Chr 11	436076	H5-10	A	G	Het
Chr 10	436355	H6-14	T	C	Het
Chr 9	439033	H3-14	C	A	Het
Chr 12	440640	H2-18	G	A	Het
Chr 12	440649	H2-18	C	T	Het
Chr 15	441438	H1-14	A	G	Het
Chr 15	441523	H1-08	G	T	Het
Chr 15	441524	H1-09	G	C	Het
Chr 8	442160	H5-16	C	G	Het
Chr 16	448100	H5-10	A	T	Het
Chr 7	449898	H3-7	C	T	Het
Chr 11	452114	H8-16	C	T	Het
Chr 1	452642	H9-12	A	C	Het
Chr 14	452871	H9-16	C	T	Het
Chr 14	455774	H1-11	G	A	Het
Chr 12	456782	H9-08	A	C	Het
Chr 13	458697	H6-19	T	C	Het
Chr 15	459723	H6-06	T	G	Het
Chr 2	460202	H4-14	AT	GC	Het
Chr 15	460364	H9-18	C	T	Het
Chr 14	467483	H1-13	A	G	Het
Chr 7	470069	H2-10	A	T	Het
Chr 4	470165	H3-4	C	G	Het
Chr 15	472180	H7-14	T	A	Het
Chr 7	473568	H1-01	T	C	Het
Chr 11	474932	H5-17	G	A	Het
Chr 4	477503	H2-15	C	A	Het
Chr 3	479116	H9-05	C	T	Het
Chr 13	480545	H8-5	G	A	Het
Chr 14	481850	H1-06	G	A	Het
Chr 8	482848	H1-12	C	A	Het
Chr 16	483092	H4-3	G	A	Het
Chr 15	484673	H8-8	T	C	Het
Chr 16	485873	H2-17	T	G	Het
Chr 13	486215	H3-17	G	A	Het
Chr 8	486368	H3-7	C	T	Het
Chr 2	486944	H3-10	G	A	Het
Chr 14	488617	H1-08	G	T	Het
Chr 13	491129	H8-19	T	C	Het
Chr 8	491344	H4-20	G	A	Het
Chr 14	494769	H3-7	G	T	Het
Chr 4	495483	H5-16	T	G	Het
Chr 15	497758	H4-12	A	G	Het
Chr 10	501450	H8-19	G	C	Het
Chr 4	501876	H9-17	C	T	Het
Chr 8	503796	H9-19	C	A	Het
Chr 11	504193	H1-10	C	T	Het
Chr 4	504808	H8-4	T	A	Het
Chr 2	505837	H6-16	A	G	Het
Chr 11	506850	H1-01	G	T	Het
Chr 12	507468	H9-14	A	C	Het
Chr 12	508437	H8-10	G	A	Het
Chr 13	509210	H9-05	A	G	Het
Chr 14	510440	H6-13	G	A	Het
Chr 4	511337	H9-14	T	C	Het
Chr 11	511838	H8-4	A	T	Het
Chr 16	513619	H5-1	G	A	Het
Chr 10	513874	H2-15	A	G	Het
Chr 11	516778	H3-4	C	T	Het
Chr 2	517934	H8-5	A	G	Het
Chr 14	521017	H9-08	C	G	Het
Chr 4	521215	H1-17	C	T	Het
Chr 15	523808	H3-14	C	G	Het
Chr 13	525698	H6-14	C	T	Het
Chr 15	526250	H9-16	T	C	Het
Chr 16	526866	H8-2	G	A	Het
Chr 5	527253	H6-19	G	A	Het
Chr 10	527709	H1-12	C	T	Het
Chr 13	529396	H7-5	A	G	Het
Chr 13	533737	H3-5	T	C	Het
Chr 13	533743	H3-5	G	C	Het
Chr 13	533749	H3-5	G	A	Het
Chr 7	534807	H1-12	T	C	Het
Chr 12	535323	H6-12	C	T	Het
Chr 8	536617	H5-4	G	A	Het
Chr 4	538525	H2-20	G	T	Het
Chr 15	538889	H8-5	G	A	Het
Chr 16	542141	H2-13	G	C	Het
Chr 4	542448	H6-10	C	A	Het
Chr 12	543480	H8-12	A	T	Het
Chr 12	545897	H1-12	A	T	Het
Chr 15	546780	H9-12	T	A	Het
Chr 11	547743	H1-04	C	A	Het
Chr 2	550268	H7-11	C	T	Het
Chr 4	553432	H3-7	T	A	Het
Chr 7	553498	H7-8	G CA	A GT	Het
Chr 7	553504	H7-8	G	A	Het
Chr 7	553510	H7-8	G	A	Het
Chr 5	555581	H3-7	A	G	Het
Chr 5	555586	H3-7	T	C	Het
Chr 5	555598	H3-7	C	T	Het
Chr 5	555607	H3-7	T	C	Het
Chr 11	555859	H1-01	T	G	Het
Chr 16	556434	H3-15	G	A	Het
Chr 7	557969	H3-7	T	C	Het
Chr 4	558508	H9-14	T	C	Het
Chr 13	558884	H8-16	A	G	Het
Chr 12	558972	H9-05	T	C	Het
Chr 14	559947	H2-15	C	A	Het
Chr 4	564927	H9-09	A	T	Het
Chr 4	566007	H8-18	A	G	Het
Chr 12	568371	H5-6	A	G	Het
Chr 12	568893	H1-02	A	G	Het
Chr 15	569249	H5-8	C	T	Het
Chr 4	570541	H9-09	T	C	Het
Chr 4	570542	H9-09	A	T	Het
Chr 14	570971	H9-04	C	T	Het
Chr 2	572881	H1-10	T	C	Het
Chr 11	573754	H4-20	G	A	Het
Chr 10	576330	H6-08	G	T	Het
Chr 10	577364	H4-15	C	T	Het
Chr 11	579792	H8-17	T	C	Het
Chr 2	580078	H6-10	G	A	Het
Chr 12	581051	H3-10	G	A	Het
Chr 12	581698	H8-10	A	G	Het
Chr 14	582650	H9-16	G	T	Het
Chr 4	583401	H4-8	G	A	Het
Chr 15	584384	H6-07	A	G	Het
Chr 11	585903	H7-7	A	G	Het
Chr 2	589579	H4-17	T	A	Het
Chr 2	591285	H3-15	T	C	Het
Chr 14	593156	H6-10	T	G	Het
Chr 8	593845	H9-12	G	T	Het
Chr 2	595803	H7-20	T	C	Het
Chr 2	596903	H5-4	C	A	Het
Chr 10	598472	H4-1	A	C	Het
Chr 7	598676	H3-19	A	G	Het
Chr 15	600572	H1-01	G	T	Het
Chr 15	600580	H1-02	C	T	Het
Chr 11	602158	H9-02	A	G	Het
Chr 15	603545	H5-18	T	C	Het
Chr 7	607298	H3-7	A	G	Het
Chr 15	608420	H9-18	C	T	Het
Chr 13	609648	H7-6	T	C	Het
Chr 12	614178	H4-9	G	C	Het
Chr 4	615553	H8-2	T	G	Het
Chr 11	619475	H7-8	G	A	Het
Chr 7	620454	H8-9	T	A	Het
Chr 2	623027	H2-11	T	C	Het
Chr 16	625686	H1-12	C	A	Het
Chr 10	627156	H4-11	C	A	Het
Chr 10	630716	H3-1	C	T	Het
Chr 14	632398	H9-04	A	G	Het
Chr 14	632411	H9-04	G	T	Het
Chr 4	632545	H9-12	G	T	Het
Chr 4	632790	H8-9	T	A	Het
Chr 7	633795	H9-03	C	A	Het
Chr 15	636985	H9-02	T	C	Het
Chr 7	636995	H4-19	C	T	Het
Chr 7	637295	H2-9	T	C	Het
Chr 12	638589	H8-15	A	G	Het
Chr 11	642912	H2-16	G	A	Het
Chr 2	643489	H9-01	G	T	Het
Chr 12	647881	H3-6	C	G	Het
Chr 16	650513	H9-07	A	G	Het
Chr 14	652959	H6-05	C	G	Het
Chr 12	655382	H9-03	G	A	Het
Chr 15	657111	H7-5	A	G	Het
Chr 16	658422	H4-7	C	T	Het
Chr 13	659236	H9-03	C	A	Het
Chr 16	666726	H3-14	A	T	Het
Chr 14	670582	H2-12	T	C	Het
Chr 12	672317	H4-10	T	C	Het
Chr 12	674079	H8-9	A	C	Het
Chr 14	674407	H5-1	G	T	Het
Chr 2	679452	H6-16	C	A	Het
Chr 16	681226	H6-20	T	C	Het
Chr 14	682483	H5-9	C	A	Het
Chr 2	687901	H5-3	C	A	Het
Chr 16	688199	H7-15	A	G	Het
Chr 10	688567	H3-2	A	G	Het
Chr 6	689382	H9-17	G	T	Het
Chr 16	689766	H6-15	C	T	Het
Chr 14	690208	H3-4	T	A	Het
Chr 1	694632	H9-17	G	T	Het
Chr 13	696794	H3-9	C	A	Het
Chr 10	697654	H5-14	G	A	Het
Chr 13	697993	H8-1	A	T	Het
Chr 15	698383	H4-6	G	C	Het
Chr 15	699014	H3-20	C	G	Het
Chr 2	702600	H3-8	C	T	Het
Chr 10	705571	H9-14	G	A	Het
Chr 13	706596	H2-14	A	T	Het
Chr 16	708778	H9-02	A	T	Het
Chr 16	709421	H6-10	G	A	Het
Chr 10	710873	H1-14	G	T	Het
Chr 2	711208	H5-3	T	A	Het
Chr 4	712423	H3-18	G	A	Het
Chr 4	712427	H3-18	G	A	Het
Chr 4	712428	H3-18	G	A	Het
Chr 4	713871	H3-15	C	T	Het
Chr 2	715239	H9-19	A	G	Het
Chr 14	715430	H3-2	T	C	Het
Chr 7	715650	H3-14	T	C	Het
Chr 7	715664	H3-14	T	C	Het
Chr 14	716055	H3-7	G	A	Het
Chr 16	718286	H3-20	G	A	Het
Chr 16	723074	H5-18	A	T	Het
Chr 4	723586	H6-11	C	G	Het
Chr 7	724919	H3-7	C	G	Het
Chr 7	724939	H3-7	G	A	Het
Chr 15	725348	H6-16	T	A	Het
Chr 13	726302	H5-9	C	A	Het
Chr 10	727695	H2-14	C	T	Het
Chr 16	728444	H1-07	G	C	Het
Chr 10	729273	H9-01	A	G	Het
Chr 4	730077	H3-7	A	G	Het
Chr 2	732818	H2-14	G	T	Het
Chr 4	733052	H8-2	A	T	Het
Chr 16	734709	H6-02	C	T	Het
Chr 14	735580	H4-17	G	A	Het
Chr 12	739681	H5-2	G	T	Het
Chr 4	742015	H7-15	A	T	Het
Chr 14	743040	H4-17	C	G	Het
Chr 14	744823	H2-15	C	T	Het
Chr 13	744974	H4-16	C	T	Het
Chr 10	745653	H6-04	T	G	Het
Chr 2	749349	H5-15	T	A	Het
Chr 16	749484	H3-15	A	T	Het
Chr 14	749513	H3-7	C	G	Het
Chr 12	750193	H9-17	G	A	Het
Chr 16	754774	H4-9	A	T	Het
Chr 13	755485	H1-13	G	A	Het
Chr 16	756540	H1-11	G	T	Het
Chr 12	761520	H7-16	T	A	Het
Chr 15	764062	H3-7	G	A	Het
Chr 16	764653	H4-9	G	A	Het
Chr 7	765258	H9-02	G	C	Het
Chr 15	767794	H3-7	C	T	Het
Chr 13	767923	H8-15	T	G	Het
Chr 13	769276	H9-08	C	T	Het
Chr 16	769344	H9-09	C	T	Het
Chr 2	773821	H8-15	T	A	Het
Chr 12	774006	H1-13	C	T	Het
Chr 14	776279	H9-04	T	C	Het
Chr 14	776288	H9-04	C	T	Het
Chr 14	776641	H6-12	A	T	Het
Chr 4	778367	H4-18	G	T	Het
Chr 16	779544	H2-18	C	T	Het
Chr 14	781018	H9-14	G	C	Het
Chr 4	783351	H2-9	C	A	Het
Chr 12	787060	H7-14	A	G	Het
Chr 12	789234	H8-10	T	A	Het
Chr 15	793644	H1-12	A	T	Het
Chr 7	794971	H8-15	T	C	Het
Chr 7	795046	H9-03	C	A	Het
Chr 2	795266	H3-3	T	A	Het
Chr 2	796754	H3-20	A	G	Het
Chr 16	799452	H5-18	G	T	Het
Chr 12	800867	H7-3	T	A	Het
Chr 2	801899	H9-09	T	C	Het
Chr 4	802805	H1-08	C	A	Het
Chr 2	807992	H7-7	C	G	Het
Chr 12	808189	H4-10	T	C	Het
Chr 2	808627	H9-07	T	G	Het
Chr 15	809591	H4-5	T	A	Het
Chr 7	811192	H8-15	C	T	Het
Chr 16	812199	H6-19	G	T	Het
Chr 15	813536	H1-14	C	T	Het
Chr 15	815574	H6-09	G	C	Het
Chr 12	817221	H3-7	G	A	Het
Chr 13	817815	H5-11	G	T	Het
Chr 13	819224	H9-15	T	C	Het
Chr 15	819395	H9-11	C	A	Het
Chr 13	823106	H1-13	C	A	Het
Chr 12	825825	H7-8	C	A	Het
Chr 12	833715	H6-06	C	T	Het
Chr 12	833741	H4-20	T	C	Het
Chr 12	833741	H8-11	A TC	G CA	Het
Chr 4	834564	H6-10	G	A	Het
Chr 16	838482	H9-04	G	T	Het
Chr 15	842029	H1-14	G	T	Het
Chr 16	843829	H8-17	A	T	Het
Chr 4	845065	H2-15	G	A	Het
Chr 7	845677	H1-12	G	T	Het
Chr 13	850019	H5-4	GC	AT	Het
Chr 12	851089	H8-15	A	G	Het
Chr 7	854497	H6-05	T	C	Het
Chr 12	857000	H8-2	T	A	Het
Chr 16	857030	H2-17	T	A	Het
Chr 15	859120	H7-4	A	T	Het
Chr 13	860130	H8-18	G	T	Het
Chr 7	861259	H7-16	T	A	Het
Chr 4	861828	H3-9	T	A	Het
Chr 12	872544	H5-12	A	C	Het
Chr 7	876399	H2-20	G	T	Het
Chr 7	877185	H5-16	T	C	Het
Chr 15	877477	H9-19	G	T	Het
Chr 12	882976	H3-7	T	C	Het
Chr 13	886072	H8-4	A	G	Het
Chr 4	890067	H8-6	A	T	Het
Chr 13	890540	H6-18	G	A	Het
Chr 15	895880	H6-18	A	T	Het
Chr 15	898841	H3-7	T	C	Het
Chr 15	900442	H1-12	G	T	Het
Chr 6	903545	H9-18	G	A	Het
Chr 4	908649	H3-7	A	G	Het
Chr 4	909828	H5-1	A	G	Het
Chr 13	909997	H6-11	G	A	Het
Chr 4	910968	H3-19	C	T	Het
Chr 5	913026	H9-02	C	A	Het
Chr 12	915700	H9-13	C	A	Het
Chr 16	916537	H5-9	G	A	Het
Chr 4	917464	H2-16	C	A	Het
Chr 7	919258	H2-14	T	C	Het
Chr 13	920961	H6-03	A C	C A	Het
Chr 16	921595	H5-4	G	A	Het
Chr 13	922715	H8-6	C	T	Het
Chr 13	924073	H1-14	C	G	Het
Chr 16	925491	H7-17	A	T	Het
Chr 16	929968	H3-7	G	T	Het
Chr 7	930302	H6-19	A	C	Het
Chr 12	935518	H2-16	T	A	Het
Chr 16	940405	H1-11	C	A	Het
Chr 15	947306	H6-08	C	T	Het
Chr 7	947442	H1-03	C	A	Het
Chr 4	948760	H6-15	C	T	Het
Chr 12	954084	H6-08	C	A	Het
Chr 4	961744	H7-5	G	T	Het
Chr 7	963899	H5-10	T	C	Het
Chr 8	963932	H9-18	G	A	Het
Chr 4	967584	H7-10	T	C	Het
Chr 15	970964	H9-04	G	A	Het
Chr 12	975414	H6-11	C	G	Het
Chr 4	976573	H5-12	A	G	Het
Chr 7	981418	H3-14	G	A	Het
Chr 12	987115	H8-12	A	T	Het
Chr 7	992004	H5-12	T	C	Het
Chr 7	995088	H1-20	G	A	Het
Chr 12	1003612	H8-7	C	T	Het
Chr 15	1006931	H5-14	T	G	Het
Chr 7	1010714	H1-10	C	A	Het
Chr 15	1011105	H2-15	C	A	Het
Chr 8	1011909	H9-03	C	A	Het
Chr 12	1017365	H2-14	T	A	Het
Chr 15	1034038	H9-13	G	T	Het
Chr 15	1039707	H6-05	G	A	Het
Chr 7	1042162	H8-19	T	C	Het
Chr 7	1046802	H1-12	C	A	Het
Chr 4	1055412	H2-10	A	G	Het
Chr 7	1055500	H6-06	G	A	Het
Chr 4	1055660	H8-9	C	A	Het
Chr 4	1059212	H4-13	G	A	Het
Chr 4	1059944	H1-02	T	C	Het
Chr 4	1059954	H1-02	T	C	Het
Chr 12	1063966	H1-08	G	A	Het
Chr 7	1068941	H9-14	C	T	Het
Chr 4	1073654	H3-9	T	C	Het
Chr 15	1075085	H1-01	C	A	Het
Chr 7	1078507	H6-17	C	T	Het
Chr 7	1082280	H6-17	G	T	Het
Chr 7	1082282	H6-17	T	C	Het
Chr 7	1082439	H9-04	A	G	Het
Chr 7	1083474	H7-17	A	G	Het
Chr 7	1083760	H6-17	T	A	Het
Chr 7	1084074	H6-17	G	A	Het
Chr 4	1085646	H5-9	G	A	Het
Chr 4	1102285	H3-15	A	T	Het
Chr 4	1113629	H2-17	G	A	Het
Chr 4	1151759	H3-5	T	C	Het
Chr 4	1226589	H5-17	A	T	Het
Chr 4	1250751	H5-3	T	A	Het
Chr 4	1261007	H1-17	C	A	Het
Chr 4	1306661	H2-15	A	C	Het
Chr 4	1307519	H7-1	C	A	Het
Chr 4	1331299	H3-15	A	T	Het
Chr 4	1352461	H3-16	A	G	Het
Chr 3	1355880	H9-11	G	T	Het
Chr 4	1386977	H3-13	T	A	Het
Chr 4	1390856	H2-15	G	C	Het
Chr 4	1401432	H6-10	T	G	Het
Chr 4	1404681	H2-9	A	G	Het
Chr 4	1434175	H4-3	G	C	Het
Chr 4	1440565	H5-4	A	G	Het
Chr 4	1443643	H4-11	A	T	Het
Chr 4	1468518	H4-2	A	C	Het
Chr 4	1483665	H3-4	A	T	Het
Chr 4	1483704	H3-4	G	A	Het
Chr 4	1483710	H3-4	A	G	Het
Chr 4	1483720	H3-4	C	T	Het
Chr 4	1484038	H3-7	G	A	Het
Chr 4	1489546	H2-17	A	T	Het
Chr 4	1503965	H1-01	G	T	Het
Chr 4	1515661	H3-7	A	G	Het
Chr 4	1519957	H3-10	C	A	Het
Chr 12	897	H9-17	G	A	Hom
Chr 2	2485	H1-07	C	G	Hom
Chr 2	2495	H1-07	G	A	Hom
Chr 7	3932	H6-17	A	T	Hom
Chr 7	6270	H6-17	G	A	Hom
Chr 14	8869	H6-13	C	T	Hom
Chr 14	9611	H6-17	T	C	Hom
Chr 1	12667	H8-6	G	A	Hom
Chr 13	13956	H9-18	A	G	Hom
Chr 14	14055	H6-17	G	A	Hom
Chr 14	14335	H6-17	T	C	Hom
Chr 6	17293	H1-16	G	T	Hom
Chr 4	17886	H6-17	A	G	Hom
Chr 5	19363	H6-19	G	A	Hom
Chr 5	19395	H9-02	G	A	Hom
Chr 13	28441	H9-18	A	G	Hom
Chr 6	37129	H3-15	T	C	Hom
Chr 14	38045	H6-17	G	C	Hom
Chr 10	71844	H9-12	G	A	Hom
Chr 10	96710	H9-10	A	T	Hom
Chr 12	113903	H4-2	G	A	Hom
Chr 15	124644	H2-16	G	C	Hom
Chr 13	142186	H5-18	C	A	Hom
Chr 1	145448	H1-01	C	T	Hom
Chr 12	166750	H2-16	G	T	Hom
Chr 16	170285	H3-3	A	C	Hom
Chr 10	171000	H1-01	T	C	Hom
Chr 1	201196	H1-20	A T	T G	Hom
Chr 8	212144	H7-17	G	T	Hom
Chr 4	221066	H3-13	G	C	Hom
Chr 14	226745	H6-17	T	G	Hom
Chr 4	228731	H7-16	A	T	Hom
Chr 15	232797	H5-9	T	C	Hom
Chr 16	235893	H3-3	A	G	Hom
Chr 14	240913	H1-05	G	A	Hom
Chr 6	265220	H6-19	T	G	Hom
Chr 10	282789	H1-02	G	A	Hom
Chr 11	290483	H1-04	T	A	Hom
Chr 13	317007	H8-4	T	C	Hom
Chr 10	318732	H3-7	A	G	Hom
Chr 16	347715	H8-6	T	C	Hom
Chr 12	348724	H8-15	G	T	Hom
Chr 11	349222	H6-10	G	T	Hom
Chr 10	350824	H1-02	A	G	Hom
Chr 10	370464	H5-15	T	C	Hom
Chr 7	404584	H6-17	T	G	Hom
Chr 7	404609	H6-17	G	A	Hom
Chr 2	412748	H1-15	T	G	Hom
Chr 7	425145	H1-16	C	T	Hom
Chr 9	439186	H1-17	A	G	Hom
Chr 9	439188	H1-18	G	A	Hom
Chr 14	443130	H6-07	T	A	Hom
Chr 10	497802	H7-10	A	C	Hom
Chr 15	511738	H3-15	A	T	Hom
Chr 11	513266	H4-13	A	T	Hom
Chr 13	528825	H8-6	G	C	Hom
Chr 13	572920	H1-05	G	A	Hom
Chr 12	582620	H6-19	A	T	Hom
Chr 16	607356	H3-14	T	C	Hom
Chr 4	618338	H6-17	C	T	Hom
Chr 12	697461	H4-2	C	A	Hom
Chr 14	782109	H6-15	C	T	Hom
Chr 12	792359	H6-03	T	A	Hom
Chr 2	811710	H6-15	A	C	Hom
Chr 2	811731	H6-15	A	C	Hom
Chr 2	811749	H6-15	G	A	Hom
Chr 2	811927	H6-15	A	G	Hom
Chr 4	818477	H5-14	G	T	Hom
Chr 4	871083	H1-15	C	T	Hom
Chr 16	880328	H1-07	A	G	Hom
Chr 13	890762	H9-19	G	A	Hom
Chr 13	919225	H6-12	C	T	Hom
Chr 7	922365	H4-14	C	A	Hom
Chr 15	952113	H4-2	C	T	Hom
Chr 7	995088	H6-20	T	G	Hom
Chr 12	1021911	H4-2	T	A	Hom
Chr 12	1063285	H4-20	CGAG	TTGA	Hom
Chr 15	1074244	H2-12	C	T	Hom
Chr 7	1076820	H6-17	C	T	Hom
Chr 7	1082456	H6-17	T	C	Hom
Chr 7	1083765	H6-17	C	T	Hom
Chr 7	1083769	H6-17	A	G	Hom
Chr 4	1129591	H2-16	C	T	Hom
Chr 4	1339781	H2-12	G	A	Hom
Chr 4	1342573	H4-2	T	A	Hom
