# Supplementary material for: Loss of heterozygosity results in rapid but variable genome homogenization across yeast genetic backgrounds
Source: eLife. 2021 Jun 23;10:e70339. doi: 10.7554/eLife.70339 (PMC8245132; doi:10.7554/eLife.70339)
Supplement: Supplementary file 6. — Chi-square test was performed using the Microsoft excel function Chisq.test(). [file elife-70339-supp6.xlsx]

## Sheet: Sheet1
Supplementary file 6- Chi-square test p-values for the SNM spectrum variation.
Background	Transitions		Transversions				Chi squared test p-value	Ts/Tv ratio	Chi squared test p-value	GC>AT/AT>GC bias	Chi squared test p-value
	A:G	C:T	A:T	A:C	G:C	G:T
H1	33	22	9	21	9	24	0.00356918	0.873016	n.s.	3.16667	0.011
H2	20	24	9	10	3	8	5.42591e-06	1.46667	n.s.	1.2963	n.s.
H3	40	40	19	7	10	7	0.0289973	1.86047	0.018	1.35	n.s.
H4	37	19	20	8	9	10	0.00982027	1.19149	n.s.	1.74074	n.s.
H5	27	22	18	10	4	6	0.00046297	1.28947	n.s.	1.40741	n.s.
H6	32	25	14	14	7	18	0.154334	1.07547	n.s.	1.69697	n.s.
H7	12	11	11	5	4	4	4.02673e-12	0.958333	n.s.	1.28571	n.s.
H8	22	23	22	4	3	7	5.98012e-06	1.25	n.s.	0.931034	n.s.
H9	22	25	5	20	3	18	2.93244e-05	1.02174	n.s.	2.26923	n.s.
