# Supplementary material for: Loss of heterozygosity results in rapid but variable genome homogenization across yeast genetic backgrounds
Source: eLife. 2021 Jun 23;10:e70339. doi: 10.7554/eLife.70339 (PMC8245132; doi:10.7554/eLife.70339)
Supplement: Supplementary file 7. [file elife-70339-supp7.xlsx]

## Sheet: Sheet1
Supplementary file 7- Strains used in the study. Accession number: PRJEB43186.
Dataset title: "Data obtained from 169 S. cerevisiae mutation accumulation lines to study patterns of loss of heterozygosity". Dataset url: https://www.ncbi.nlm.nih.gov/sra/?term=PRJEB43186
S. no.	Line ID	Parent cross	Mean coverage
1	H1-1	ABS x BKL	92.99
2	H1-2	ABS x BKL	111.65
3	H1-3	ABS x BKL	89.83
4	H1-4	ABS x BKL	90.06
5	H1-5	ABS x BKL	90.75
6	H1-6	ABS x BKL	84.37
7	H1-7	ABS x BKL	85.81
8	H1-8	ABS x BKL	93.06
9	H1-9	ABS x BKL	90.04
10	H1-10	ABS x BKL	92.05
11	H1-11	ABS x BKL	86.84
12	H1-12	ABS x BKL	83.44
13	H1-13	ABS x BKL	87.57
14	H1-14	ABS x BKL	87.54
15	H1-15	ABS x BKL	91.09
16	H1-16	ABS x BKL	89.18
17	H1-17	ABS x BKL	88.03
18	H1-18	ABS x BKL	87.43
19	H1-19	ABS x BKL	88.8
20	H1-20	ABS x BKL	88.08
21	H2-9	ABP x BFQ	5.76
22	H2-10	ABP x BFQ	7.06
23	H2-11	ABP x BFQ	4.92
24	H2-12	ABP x BFQ	6.93
25	H2-13	ABP x BFQ	15.31
26	H2-14	ABP x BFQ	5.1
27	H2-15	ABP x BFQ	14.76
28	H2-16	ABP x BFQ	6.11
29	H2-17	ABP x BFQ	6.04
30	H2-18	ABP x BFQ	5.21
31	H2-19	ABP x BFQ	6.49
32	H2-20	ABP x BFQ	10.63
33	H3-1	BAP x BAN	6.39
34	H3-2	BAP x BAN	5.45
35	H3-3	BAP x BAN	6.59
36	H3-4	BAP x BAN	5.42
37	H3-5	BAP x BAN	6.67
38	H3-6	BAP x BAN	5.41
39	H3-7	BAP x BAN	7.23
40	H3-8	BAP x BAN	6.19
41	H3-9	BAP x BAN	5.53
42	H3-10	BAP x BAN	6.28
43	H3-11	BAP x BAN	9.61
44	H3-12	BAP x BAN	10.18
45	H3-13	BAP x BAN	6.26
46	H3-14	BAP x BAN	7.79
47	H3-15	BAP x BAN	6.92
48	H3-16	BAP x BAN	8.09
49	H3-17	BAP x BAN	6.99
50	H3-18	BAP x BAN	7.13
51	H3-19	BAP x BAN	5.91
52	H3-20	BAP x BAN	5.37
53	H4-1	BTI x ABA	6.7
54	H4-2	BTI x ABA	7.2
55	H4-3	BTI x ABA	8.09
56	H4-4	BTI x ABA	8.05
57	H4-5	BTI x ABA	8.17
58	H4-6	BTI x ABA	7.71
59	H4-7	BTI x ABA	10.31
60	H4-8	BTI x ABA	8.56
61	H4-9	BTI x ABA	4.15
62	H4-10	BTI x ABA	4.79
63	H4-11	BTI x ABA	6.25
64	H4-12	BTI x ABA	4.39
65	H4-13	BTI x ABA	4.43
66	H4-14	BTI x ABA	3.28
67	H4-15	BTI x ABA	11.03
68	H4-16	BTI x ABA	4.46
69	H4-17	BTI x ABA	9.84
70	H4-18	BTI x ABA	10.25
71	H4-19	BTI x ABA	10.87
72	H4-20	BTI x ABA	10.44
73	H5-1	ACD x AKQ	5.12
74	H5-2	ACD x AKQ	9.87
75	H5-3	ACD x AKQ	8.34
76	H5-4	ACD x AKQ	7.49
77	H5-5	ACD x AKQ	12.64
78	H5-6	ACD x AKQ	9.96
79	H5-7	ACD x AKQ	14.6
80	H5-8	ACD x AKQ	7.36
81	H5-9	ACD x AKQ	5.51
82	H5-10	ACD x AKQ	6.12
83	H5-11	ACD x AKQ	8.6
84	H5-12	ACD x AKQ	7.06
85	H5-13	ACD x AKQ	11.91
86	H5-14	ACD x AKQ	6.75
87	H5-15	ACD x AKQ	9.37
88	H5-16	ACD x AKQ	8.87
89	H5-17	ACD x AKQ	7.05
90	H5-18	ACD x AKQ	7.66
91	H5-19	ACD x AKQ	7.09
92	H5-20	ACD x AKQ	6.64
93	H6-1	ACK x CMQ	116.47
94	H6-2	ACK x CMQ	108.48
95	H6-3	ACK x CMQ	134.09
96	H6-4	ACK x CMQ	89.13
97	H6-5	ACK x CMQ	83.12
98	H6-6	ACK x CMQ	142.56
99	H6-7	ACK x CMQ	126.77
100	H6-8	ACK x CMQ	136.77
101	H6-9	ACK x CMQ	132.73
102	H6-10	ACK x CMQ	118.18
103	H6-11	ACK x CMQ	102.65
104	H6-12	ACK x CMQ	121.54
105	H6-13	ACK x CMQ	123.37
106	H6-14	ACK x CMQ	106.25
107	H6-15	ACK x CMQ	74.56
108	H6-16	ACK x CMQ	143.22
109	H6-17	ACK x CMQ	135.22
110	H6-18	ACK x CMQ	141.71
111	H6-19	ACK x CMQ	138.31
112	H6-20	ACK x CMQ	113.17
113	H7-1	ACG x BAK	5.42
114	H7-2	ACG x BAK	7.74
115	H7-3	ACG x BAK	5.52
116	H7-4	ACG x BAK	7.1
117	H7-5	ACG x BAK	7.31
118	H7-6	ACG x BAK	8.65
119	H7-7	ACG x BAK	3.76
120	H7-8	ACG x BAK	7.12
121	H7-9	ACG x BAK	3.97
122	H7-10	ACG x BAK	6.04
123	H7-11	ACG x BAK	6.6
124	H7-12	ACG x BAK	6.71
125	H7-14	ACG x BAK	3.09
126	H7-15	ACG x BAK	4.89
127	H7-16	ACG x BAK	4.43
128	H7-17	ACG x BAK	3.41
129	H7-18	ACG x BAK	3.81
130	H7-19	ACG x BAK	4.61
131	H7-20	ACG x BAK	3.86
132	H8-1	CGD x AKE	5.67
133	H8-2	CGD x AKE	6.04
134	H8-3	CGD x AKE	7.08
135	H8-4	CGD x AKE	7.86
136	H8-5	CGD x AKE	8.96
137	H8-6	CGD x AKE	10.62
138	H8-7	CGD x AKE	6.01
139	H8-8	CGD x AKE	8.16
140	H8-9	CGD x AKE	4.48
141	H8-10	CGD x AKE	6.99
142	H8-11	CGD x AKE	8.42
143	H8-12	CGD x AKE	7.5
144	H8-13	CGD x AKE	5.67
145	H8-15	CGD x AKE	4.1
146	H8-16	CGD x AKE	5.97
147	H8-17	CGD x AKE	5.72
148	H8-18	CGD x AKE	5.45
149	H8-19	CGD x AKE	6.52
150	H8-20	CGD x AKE	8.27
151	H9-1	BAM x CPG	107.36
152	H9-2	BAM x CPG	85.55
153	H9-3	BAM x CPG	88.06
154	H9-4	BAM x CPG	91.08
155	H9-5	BAM x CPG	120.3
156	H9-6	BAM x CPG	131.12
157	H9-7	BAM x CPG	93.6
158	H9-8	BAM x CPG	103.21
159	H9-9	BAM x CPG	115.44
160	H9-10	BAM x CPG	119.28
161	H9-11	BAM x CPG	98.79
162	H9-12	BAM x CPG	106.38
163	H9-13	BAM x CPG	110.77
164	H9-14	BAM x CPG	120.35
165	H9-15	BAM x CPG	122.92
166	H9-16	BAM x CPG	133.98
167	H9-17	BAM x CPG	89.14
168	H9-18	BAM x CPG	81.33
169	H9-19	BAM x CPG	93.84
